# Supplementary material
Source: JCI journal article supplement (doi:10.1172/jci.insight.204463)
Supplement: sd1 [file 1]

Supplemental Table 1: *Baseline characteristics of the EXSCEL clinical trial cohort that did not have proteomics versus EXSCEL proteomics cohort selected at random.*

|                                                   | EXSCEL Cohort without Proteomics | EXSCEL Cohort with Proteomics | *p     |
|---------------------------------------------------|----------------------------------|-------------------------------|--------|
| n                                                 | 9627                             | 5125                          |        |
| Age (mean (SD))                                   | 61.65 (9.40)                     | 62.31 (9.38)                  | <0.001 |
| Sex = M (%)                                       | 5985 (62.2)                      | 3164 (61.7)                   | 0.619  |
| Pooled race group (%)                             |                                  |                               | <0.001 |
| Black                                             | 804 (8.4)                        | 74 (1.4)                      |        |
| White                                             | 6774 (70.4)                      | 4401 (85.9)                   |        |
| Treatment Arm (%)                                 |                                  |                               | 0.004  |
| EQW 2 mg                                          | 4789 (49.7)                      | 2555 (49.9)                   |        |
| Not Treated                                       | 33 (0.3)                         | 3 (0.1)                       |        |
| Placebo                                           | 4805 (49.9)                      | 2567 (50.1)                   |        |
| Body Mass Index (mean (SD))                       | 32.26 (6.40)                     | 33.46 (6.32)                  | <0.001 |
| Atrial fibrillation/atrial flutter (%)            | 561 (5.8)                        | 438 (8.5)                     | <0.001 |
| Prior CV Event (for stratification) = Y (%)       | 7084 (73.6)                      | 3698 (72.2)                   | 0.065  |
| Duration of Diabetes at BL (mean (SD))            | 13.13 (8.26)                     | 13.00 (8.29)                  | 0.347  |
| Smoking Status at BL (%)                          |                                  |                               | 0.172  |
| Current                                           | 1156 (12.0)                      | 565 (11.0)                    |        |
| Former                                            | 3779 (39.3)                      | 2012 (39.3)                   |        |
| Never                                             | 4685 (48.7)                      | 2548 (49.7)                   |        |
| Systolic BP at BL (mean (SD))                     | 135.39 (17.36)                   | 135.59 (15.95)                | 0.512  |
| Diastolic BP at Baseline (mean (SD))              | 78.04 (10.26)                    | 78.26 (10.29)                 | 0.212  |
| Total Cholesterol at Baseline (mg/dl) (mean (SD)) | 173.81 (140.93)                  | 177.65 (101.94)               | 0.094  |
| LDL at Baseline (mg/dl) (mean (SD))               | 94.14 (62.75)                    | 96.46 (42.35)                 | 0.032  |
| HDL at Baseline (mg/dl) (mean (SD))               | 43.77 (27.92)                    | 44.36 (21.12)                 | 0.211  |
| eGFR at Baseline (mean (SD))                      | 81.62 (20.37)                    | 81.40 (20.19)                 | 0.54   |
| Hb A1c at Baseline (mean (SD))                    | 8.09 (0.97)                      | 8.15 (0.94)                   | <0.001 |
| Creatinine at Baseline (mg/dl) (mean (SD))        | 0.98 (0.29)                      | 0.98 (0.28)                   | 0.497  |
| Hypertension Therapy at Baseline = Y (%)          | 9471 (98.4)                      | 5053 (98.6)                   | 0.347  |
| Aspirin Therapy at Baseline = Y (%)               | 6098 (63.3)                      | 3282 (64.0)                   | 0.413  |
| Statin Therapy at Baseline = Y (%)                | 7044 (73.2)                      | 3801 (74.2)                   | 0.198  |

\*P-values based on t-test for continuous variables and Pearson's chi-squared test for categorical variables.

Supplemental Table 2: *Baseline characteristics of validation cohort CHS overall and stratified by baseline CVD.*

|                                                   | Full Proteomics Cohort | No Prevalent CVD | CVD at Baseline | *p-value |
|---------------------------------------------------|------------------------|------------------|-----------------|----------|
| N                                                 | 3,085                  | 2,763            | 322             |          |
| Age (mean (SD))                                   | 74.4 (4.9)             | 74.3 (4.8)       | 75.0 (5.1)      | 0.012    |
| Female, N (%)                                     | 1,875 (60.8)           | 1,730 (62.6)     | 145 (45.0)      | <0.001   |
| Self-reported Race                                |                        |                  |                 | 0.024    |
| Black, N (%)                                      | 495 (16.0)             | 423 (15.3)       | 72 (22.4)       |          |
| Other, N (%)                                      | 16 (0.5)               | 15 (0.5)         | 1 (0.3)         |          |
| White, N (%)                                      | 2,574 (83.4)           | 2,325 (84.1)     | 240 (83.9)      |          |
| BMI (mean (SD))                                   | 26.6 (4.5)             | 26.6 (4.5)       | 26.6 (4.5)      | 0.721    |
| DM, N (%)                                         | 457 (14.8)             | 381 (13.8)       | 76 (23.6)       | <0.001   |
| Smoking                                           |                        |                  |                 | 0.059    |
| Former, N (%)                                     | 1,360 (44.1)           | 1,198 (43.4)     | 162 (50.3)      |          |
| Current, N (%)                                    | 291 (9.4)              | 264 (9.6)        | 27 (8.4)        |          |
| Never, N (%)                                      | 1,434 (46.5)           | 1,301 (47.1)     | 133 (41.3)      |          |
| Systolic BP at Baseline (mean (SD))               | 135.6 (21.2)           | 135.5 (21.0)     | 136.5 (22.7)    | 0.520    |
| Diastolic BP at Baseline (mean (SD))              | 71.3 (10.9)            | 71.4 (10.8)      | 70.2 (11.3)     | 0.149    |
| Total Cholesterol at Baseline (mg/dl) (mean (SD)) | 202.4 (37.2)           | 202.4 (36.5)     | 202.9 (42.8)    | 0.659    |
| LDL at Baseline (mg/dl) (mean (SD))               | 121.1 (33.6)           | 120.8 (33.0)     | 123.6 (38.5)    | 0.386    |
| HDL at Baseline (mg/dl) (mean (SD))               | 54.1 (14.2)            | 54.6 (14.2)      | 49.9 (13.7)     | <0.001   |
| eGFR at Baseline (mean (SD))                      | 70.2 (16.3)            | 70.8 (15.9)      | 65.4 (19.2)     | <0.001   |
| Aspirin Therapy at Baseline, N (%)                | 90 (2.9)               | 69 (2.5)         | 21 (6.5)        | <0.001   |
| Statin Therapy at Baseline, N (%)                 | 160 (5.2)              | 127 (4.6)        | 33 (10.2)       | <0.001   |

\*P-values based on t-test for continuous variables and Pearson's chi-squared test for categorical variables.

Supplemental Table 3: *Baseline characteristics of validation cohort PROMISE overall and stratified by MACE.*

|                         | Full Validation Cohort | No MACE     | MACE        | *p-value |
|-------------------------|------------------------|-------------|-------------|----------|
| n                       | 860                    | 821         | 38          |          |
| Age (mean (SD))         | 59.7 (8.1)             | 59.6 (8.1)  | 61.9 (9.4)  | 0.1      |
| Female (%)              | 286 (33.3)             | 276 (33.6)  | 10 (26.3)   | 0.4      |
| Race (%)                |                        |             |             | 0.6      |
| American Indian, N (%)  | 4 (0.5)                | 4 (0.5)     | 0 (0.0)     |          |
| White, N (%)            | 771 (90.2)             | 738 (90.3)  | 33 (86.8)   |          |
| Black, N (%)            | 65 (7.6)               | 60 (7.3)    | 5 (13.2)    |          |
| Asian, N (%)            | 11 (1.3)               | 11 (1.3)    | 0 (0.0)     |          |
| Pacific Islander, N (%) | 4 (0.5)                | 4 (0.5)     | 0 (0.0)     |          |
| BMI (mean (SD))         | 30.52 (5.7)            | 30.60 (5.7) | 28.89 (4.0) | 0.08     |
| Smoker (%)              |                        |             |             | 0.03     |
| Never, N (%)            | 375 (43.7)             | 366 (44.6)  | 9 (23.7)    |          |
| Current, N (%)          | 185 (21.5)             | 176 (21.4)  | 9 (23.7)    |          |
| Former, N (%)           | 299 (34.8)             | 279 (34.0)  | 20 (52.6)   |          |
| History of T2DM (%)     | 178 (20.7)             | 170 (20.7)  | 8 (21.1)    | 1        |
| History of HTN (%)      | 562 (65.4)             | 540 (65.8)  | 22 (57.9)   | 0.4      |
| History of CVD (%)      | 32 (3.7)               | 32 (3.9)    | 0 (0.0)     | 0.4      |
| History of HF (%)       | 46 (5.4)               | 44 (5.4)    | 2 (5.3)     | 1        |
| History of HLD (%)      | 554 (64.5)             | 531 (64.7)  | 23 (60.5)   | 0.7      |

|                                |              |              |              |     |
|--------------------------------|--------------|--------------|--------------|-----|
| eGFR (mean (SD))               | 80.14 (18.9) | 80.07 (18.8) | 81.66 (21.6) | 0.6 |
| Statin therapy at Baseline (%) | 366 (44.8)   | 351 (44.9)   | 15 (41.7)    | 0.8 |

\*P-values based on t-test for continuous variables and Pearson's chi-squared test for categorical variables.

Supplement Table 4: *Significant proteins from multivariable Cox proportional hazards models associated with MACE in EXSCEL proteomics cohort (N=1,278).*

| Protein                                                                                   | H<br>R         | Lower<br>Confidence<br>Limit | Upper<br>Confidence<br>Limit | Standard<br>Error | p-<br>value  | FDR<br>adjusted p-<br>value |
|-------------------------------------------------------------------------------------------|----------------|------------------------------|------------------------------|-------------------|--------------|-----------------------------|
| <b>Tetranectin</b>                                                                        | 0.1<br>65      | 0.121                        | 0.227                        | 0.16              | 3.56E-<br>29 | 8.86E-26                    |
| <b>Tumor necrosis factor ligand superfamily member 15</b>                                 | 3.8<br>77      | 3.032                        | 4.957                        | 0.125             | 3.19E-<br>27 | 5.30E-24                    |
| <b>Angiopoietin-2</b>                                                                     | 2.5<br>3       | 2.114                        | 3.029                        | 0.0918            | 4.86E-<br>24 | 6.04E-21                    |
| <b>Natriuretic peptides B</b>                                                             | 1.8<br>79      | 1.638                        | 2.155                        | 0.07              | 1.99E-<br>19 | 1.98E-16                    |
| <b>Lipopolysaccharide-binding protein</b>                                                 | 9.0<br>03      | 5.564                        | 14.568                       | 0.246             | 3.58E-<br>19 | 2.97E-16                    |
| <b>Coiled-coil domain-containing protein 126</b>                                          | 0.3<br>08      | 0.237                        | 0.399                        | 0.133             | 7.96E-<br>19 | 5.66E-16                    |
| <b>Alpha-1-antichymotrypsin</b>                                                           | 11.<br>22<br>1 | 6.561                        | 19.191                       | 0.274             | 1.04E-<br>18 | 6.46E-16                    |
| <b>Collagen alpha-1(XXVIII) chain</b>                                                     | 3.7<br>86      | 2.783                        | 5.151                        | 0.157             | 2.38E-<br>17 | 1.24E-14                    |
| <b>Palmitoleoyl-protein carboxylesterase NOTUM</b>                                        | 0.4<br>56      | 0.38                         | 0.547                        | 0.0927            | 2.50E-<br>17 | 1.24E-14                    |
| <b>Protein jagged-1</b>                                                                   | 2.4<br>82      | 2.009                        | 3.067                        | 0.108             | 3.50E-<br>17 | 1.59E-14                    |
| <b>Group XIIB secretory phospholipase A2-like protein</b>                                 | 0.3<br>13      | 0.239                        | 0.411                        | 0.138             | 4.87E-<br>17 | 2.02E-14                    |
| <b>Hemopexin</b>                                                                          | 7.8<br>22      | 4.82                         | 12.692                       | 0.247             | 8.28E-<br>17 | 3.17E-14                    |
| <b>Neuroblastoma suppressor of tumorigenicity 1</b>                                       | 2.0<br>88      | 1.751                        | 2.49                         | 0.0898            | 2.40E-<br>16 | 6.72E-14                    |
| <b>WAP four-disulfide core domain protein 2</b>                                           | 2.5<br>86      | 2.061                        | 3.244                        | 0.116             | 2.18E-<br>16 | 6.72E-14                    |
| <b>Fibulin-1</b>                                                                          | 6.7<br>39      | 4.275                        | 10.623                       | 0.232             | 2.10E-<br>16 | 6.72E-14                    |
| <b>Ficolin-1</b>                                                                          | 1.8<br>21      | 1.579                        | 2.1                          | 0.0729            | 1.94E-<br>16 | 6.72E-14                    |
| <b>Immunoglobulin G</b>                                                                   | 7.0<br>97      | 4.443                        | 11.338                       | 0.239             | 2.43E-<br>16 | 6.72E-14                    |
| <b>Beta-2-microglobulin</b>                                                               | 3.4<br>61      | 2.561                        | 4.678                        | 0.154             | 6.43E-<br>16 | 1.68E-13                    |
| <b>Alpha-2-HS-glycoprotein</b>                                                            | 0.1<br>42      | 0.088                        | 0.229                        | 0.243             | 1.08E-<br>15 | 2.69E-13                    |
| <b>Sushi, von Willebrand factor type A, EGF and pentraxin domain-containing protein 1</b> | 2.1<br>64      | 1.788                        | 2.618                        | 0.0973            | 2.09E-<br>15 | 4.96E-13                    |
| <b>Follistatin-related protein 3</b>                                                      | 3.4<br>8       | 2.552                        | 4.745                        | 0.158             | 3.18E-<br>15 | 7.19E-13                    |
| <b>Complement component C9</b>                                                            | 4.6<br>99      | 3.163                        | 6.979                        | 0.202             | 1.77E-<br>14 | 3.84E-12                    |
| <b>Asialoglycoprotein receptor 1</b>                                                      | 2.6<br>61      | 2.071                        | 3.42                         | 0.128             | 1.96E-<br>14 | 4.07E-12                    |
| <b>Cadherin-3</b>                                                                         | 0.2<br>49      | 0.174                        | 0.357                        | 0.184             | 3.93E-<br>14 | 7.84E-12                    |
| <b>EGF-containing fibulin-like extracellular matrix protein 1</b>                         | 3.0<br>12      | 2.25                         | 4.032                        | 0.149             | 1.25E-<br>13 | 2.39E-11                    |
| <b>Epidermal growth factor receptor</b>                                                   | 0.1<br>35      | 0.08                         | 0.23                         | 0.27              | 1.35E-<br>13 | 2.49E-11                    |
| <b>Collagen alpha-3(VI) chain</b>                                                         | 3.2<br>05      | 2.35                         | 4.371                        | 0.158             | 1.89E-<br>13 | 3.35E-11                    |
| <b>Cholinesterase</b>                                                                     | 0.3<br>03      | 0.22                         | 0.416                        | 0.163             | 2.08E-<br>13 | 3.57E-11                    |
| <b>Extracellular tyrosine-protein kinase PKDCC</b>                                        | 0.2<br>04      | 0.133                        | 0.312                        | 0.217             | 2.30E-<br>13 | 3.82E-11                    |
| <b>Zinc finger protein 18</b>                                                             | 0.1<br>27      | 0.073                        | 0.222                        | 0.286             | 4.85E-<br>13 | 7.78E-11                    |
| <b>Sodium-coupled monocarboxylate transporter 1</b>                                       | 2.3<br>08      | 1.838                        | 2.898                        | 0.116             | 5.87E-<br>13 | 9.14E-11                    |

|                                                                                           |                |       |        |        |              |          |
|-------------------------------------------------------------------------------------------|----------------|-------|--------|--------|--------------|----------|
| <b>Ganglioside GM2 activator</b>                                                          | 2.7<br>13      | 2.066 | 3.563  | 0.139  | 6.97E-<br>13 | 1.05E-10 |
| <b>Tumor necrosis factor receptor superfamily member 1A</b>                               | 2.4<br>51      | 1.914 | 3.139  | 0.126  | 1.22E-<br>12 | 1.78E-10 |
| <b>Alpha-internexin</b>                                                                   | 1.7<br>75      | 1.515 | 2.079  | 0.0808 | 1.25E-<br>12 | 1.78E-10 |
| <b>Cystatin-C</b>                                                                         | 3.5<br>11      | 2.48  | 4.971  | 0.177  | 1.46E-<br>12 | 1.96E-10 |
| <b>R-spondin-4</b>                                                                        | 2.3<br>16      | 1.835 | 2.921  | 0.119  | 1.42E-<br>12 | 1.96E-10 |
| <b>Insulin-like growth factor-binding protein 2</b>                                       | 1.8<br>54      | 1.562 | 2.2    | 0.0874 | 1.62E-<br>12 | 2.07E-10 |
| <b>Fibulin-5</b>                                                                          | 2.9<br>02      | 2.16  | 3.899  | 0.151  | 1.58E-<br>12 | 2.07E-10 |
| <b>Copper transport protein ATOX1</b>                                                     | 1.8<br>41      | 1.552 | 2.184  | 0.0873 | 2.66E-<br>12 | 3.31E-10 |
| <b>E3 ubiquitin-protein ligase DTX1</b>                                                   | 0.2<br>58      | 0.176 | 0.377  | 0.194  | 2.99E-<br>12 | 3.63E-10 |
| <b>Syndecan-3</b>                                                                         | 0.3<br>78      | 0.287 | 0.497  | 0.14   | 3.60E-<br>12 | 4.27E-10 |
| <b>Selenoprotein M</b>                                                                    | 2.4<br>87      | 1.918 | 3.223  | 0.132  | 6.03E-<br>12 | 6.98E-10 |
| <b>Sushi, von Willebrand factor type A, EGF and pentraxin domain-containing protein 1</b> | 1.8<br>96      | 1.579 | 2.277  | 0.0934 | 7.28E-<br>12 | 7.97E-10 |
| <b>Alcohol dehydrogenase 1A</b>                                                           | 0.5<br>78      | 0.494 | 0.676  | 0.08   | 7.19E-<br>12 | 7.97E-10 |
| <b>Peflin</b>                                                                             | 3.0<br>16      | 2.199 | 4.136  | 0.161  | 7.36E-<br>12 | 7.97E-10 |
| <b>Serotransferrin</b>                                                                    | 6.7<br>23      | 3.888 | 11.624 | 0.279  | 9.05E-<br>12 | 9.58E-10 |
| <b>Growth hormone receptor</b>                                                            | 0.4<br>21      | 0.328 | 0.54   | 0.128  | 1.23E-<br>11 | 1.25E-09 |
| <b>Surfeit locus protein 1</b>                                                            | 0.4<br>87      | 0.396 | 0.6    | 0.106  | 1.22E-<br>11 | 1.25E-09 |
| <b>Plastin-2</b>                                                                          | 0.3<br>68      | 0.276 | 0.492  | 0.148  | 1.31E-<br>11 | 1.30E-09 |
| <b>Uncharacterized protein C3orf18</b>                                                    | 0.1<br>99      | 0.125 | 0.318  | 0.239  | 1.49E-<br>11 | 1.45E-09 |
| <b>Matrix-remodeling-associated protein 7</b>                                             | 2.0<br>73      | 1.676 | 2.564  | 0.109  | 1.83E-<br>11 | 1.75E-09 |
| <b>Intercellular adhesion molecule 5</b>                                                  | 2.1<br>06      | 1.691 | 2.623  | 0.112  | 2.98E-<br>11 | 2.80E-09 |
| <b>Endoglin</b>                                                                           | 2.5<br>04      | 1.909 | 3.286  | 0.139  | 3.40E-<br>11 | 3.13E-09 |
| <b>Transgelin</b>                                                                         | 2.2<br>12      | 1.749 | 2.799  | 0.12   | 3.73E-<br>11 | 3.37E-09 |
| <b>Cartilage acidic protein 1</b>                                                         | 0.4<br>09      | 0.314 | 0.534  | 0.136  | 4.66E-<br>11 | 4.14E-09 |
| <b>Ectonucleoside triphosphate diphosphohydrolase 5</b>                                   | 0.3<br>83      | 0.287 | 0.511  | 0.147  | 7.68E-<br>11 | 6.70E-09 |
| <b>Integral membrane protein 2B</b>                                                       | 1.8<br>08      | 1.511 | 2.162  | 0.0913 | 9.00E-<br>11 | 7.72E-09 |
| <b>Acidic leucine-rich nuclear phosphoprotein 32 family member B</b>                      | 2.0<br>6       | 1.652 | 2.567  | 0.112  | 1.29E-<br>10 | 1.09E-08 |
| <b>Complement factor H</b>                                                                | 16.<br>57<br>3 | 7.037 | 39.031 | 0.437  | 1.32E-<br>10 | 1.10E-08 |
| <b>Spondin-1</b>                                                                          | 2.9<br>06      | 2.098 | 4.025  | 0.166  | 1.39E-<br>10 | 1.13E-08 |
| <b>Alcohol dehydrogenase 4</b>                                                            | 0.6<br>77      | 0.6   | 0.762  | 0.061  | 1.46E-<br>10 | 1.17E-08 |
| <b>Shadow of prion protein</b>                                                            | 1.6<br>68      | 1.426 | 1.951  | 0.08   | 1.62E-<br>10 | 1.28E-08 |
| <b>Delta-like protein 4</b>                                                               | 1.9<br>68      | 1.598 | 2.423  | 0.106  | 1.89E-<br>10 | 1.47E-08 |
| <b>Uncharacterized protein C14orf93</b>                                                   | 0.3<br>39      | 0.243 | 0.474  | 0.17   | 2.20E-<br>10 | 1.69E-08 |

|                                                             |           |       |       |        |          |          |
|-------------------------------------------------------------|-----------|-------|-------|--------|----------|----------|
| Zona pellucida-binding protein 1                            | 0.1<br>14 | 0.058 | 0.223 | 0.342  | 2.30E-10 | 1.73E-08 |
| Growth/differentiation factor 15                            | 1.6<br>95 | 1.438 | 1.998 | 0.0839 | 3.26E-10 | 2.42E-08 |
| Ephrin-B2                                                   | 2.3<br>11 | 1.778 | 3.005 | 0.134  | 4.02E-10 | 2.94E-08 |
| tRNA (guanine-N(7)-)-methyltransferase                      | 0.2<br>19 | 0.136 | 0.353 | 0.244  | 4.60E-10 | 3.32E-08 |
| Chymotrypsin-like elastase family member 1                  | 1.8<br>86 | 1.544 | 2.304 | 0.102  | 5.01E-10 | 3.57E-08 |
| Hippocalcin-like protein 1                                  | 0.3<br>08 | 0.213 | 0.447 | 0.19   | 5.25E-10 | 3.68E-08 |
| Kallikrein-11                                               | 2.4<br>02 | 1.818 | 3.174 | 0.142  | 7.11E-10 | 4.91E-08 |
| Titin                                                       | 1.5<br>65 | 1.357 | 1.805 | 0.0728 | 7.85E-10 | 5.36E-08 |
| Inactive tyrosine-protein kinase 7                          | 3.1<br>37 | 2.178 | 4.518 | 0.186  | 8.19E-10 | 5.51E-08 |
| Periostin                                                   | 2.0<br>7  | 1.64  | 2.611 | 0.119  | 8.71E-10 | 5.73E-08 |
| Sodium/potassium-transporting ATPase subunit beta-1         | 0.5<br>3  | 0.432 | 0.649 | 0.104  | 8.75E-10 | 5.73E-08 |
| DnaJ homolog subfamily B member 12                          | 1.8<br>3  | 1.506 | 2.222 | 0.0992 | 1.13E-09 | 7.11E-08 |
| Solute carrier family 22 member 16                          | 0.5<br>64 | 0.469 | 0.678 | 0.0942 | 1.13E-09 | 7.11E-08 |
| Biglycan                                                    | 2.0<br>57 | 1.631 | 2.594 | 0.118  | 1.12E-09 | 7.11E-08 |
| C-reactive protein                                          | 1.4<br>67 | 1.296 | 1.66  | 0.0631 | 1.25E-09 | 7.77E-08 |
| Alcohol dehydrogenase 1C                                    | 0.7<br>53 | 0.687 | 0.826 | 0.0468 | 1.42E-09 | 8.70E-08 |
| WAP four-disulfide core domain protein 1                    | 2.2<br>31 | 1.72  | 2.894 | 0.133  | 1.46E-09 | 8.86E-08 |
| Troponin T, cardiac muscle                                  | 1.5<br>47 | 1.343 | 1.783 | 0.0723 | 1.60E-09 | 9.61E-08 |
| Latent-transforming growth factor beta-binding protein 4    | 2.2<br>88 | 1.747 | 2.995 | 0.137  | 1.74E-09 | 1.03E-07 |
| Growth factor receptor-bound protein 7                      | 0.2<br>47 | 0.156 | 0.39  | 0.234  | 2.11E-09 | 1.24E-07 |
| Resistin                                                    | 1.9<br>87 | 1.586 | 2.49  | 0.115  | 2.46E-09 | 1.42E-07 |
| Alpha-1-microglobulin                                       | 4.3<br>55 | 2.682 | 7.07  | 0.247  | 2.67E-09 | 1.53E-07 |
| Roundabout homolog 1                                        | 2.1<br>76 | 1.684 | 2.811 | 0.131  | 2.74E-09 | 1.55E-07 |
| Alpha-N-acetylgalactosaminide alpha-2,6-sialyltransferase 2 | 0.4<br>72 | 0.368 | 0.605 | 0.127  | 2.95E-09 | 1.63E-07 |
| Intercellular adhesion molecule 5                           | 2.0<br>94 | 1.64  | 2.673 | 0.125  | 2.95E-09 | 1.63E-07 |
| Lymphotoxin alpha2:beta1                                    | 0.3<br>71 | 0.268 | 0.515 | 0.167  | 2.98E-09 | 1.63E-07 |
| rRNA 2'-O-methyltransferase fibrillar                       | 0.2<br>59 | 0.165 | 0.406 | 0.23   | 3.98E-09 | 2.15E-07 |
| Protocadherin-10                                            | 1.8<br>06 | 1.483 | 2.2   | 0.101  | 4.13E-09 | 2.20E-07 |
| Plasminogen                                                 | 0.2<br>43 | 0.152 | 0.39  | 0.24   | 4.16E-09 | 2.20E-07 |
| Apolipoprotein B                                            | 1.7<br>49 | 1.451 | 2.11  | 0.0956 | 4.90E-09 | 2.57E-07 |
| Vascular endothelial growth factor D                        | 1.8<br>44 | 1.501 | 2.265 | 0.105  | 5.60E-09 | 2.90E-07 |
| Ephrin-A5                                                   | 2.4<br>44 | 1.809 | 3.303 | 0.154  | 5.82E-09 | 2.99E-07 |
| Twisted gastrulation protein homolog 1                      | 3.1<br>8  | 2.149 | 4.704 | 0.2    | 7.06E-09 | 3.59E-07 |
| Scavenger receptor class F member 2                         | 3.3<br>23 | 2.211 | 4.994 | 0.208  | 7.55E-09 | 3.80E-07 |

|                                                                              |       |       |       |        |          |          |
|------------------------------------------------------------------------------|-------|-------|-------|--------|----------|----------|
| <b>Cadherin-7</b>                                                            | 0.57  | 0.471 | 0.69  | 0.0975 | 8.06E-09 | 3.96E-07 |
| <b>C-type lectin domain family 4 member G</b>                                | 1.895 | 1.525 | 2.355 | 0.111  | 8.04E-09 | 3.96E-07 |
| <b>Torsin-1A-interacting protein 1</b>                                       | 0.51  | 0.405 | 0.641 | 0.117  | 8.19E-09 | 3.96E-07 |
| <b>Apolipoprotein A-I</b>                                                    | 0.523 | 0.419 | 0.652 | 0.112  | 8.15E-09 | 3.96E-07 |
| <b>Heat shock 70 kDa protein 1A</b>                                          | 0.377 | 0.27  | 0.525 | 0.169  | 8.42E-09 | 4.03E-07 |
| <b>Selenoprotein W</b>                                                       | 1.634 | 1.381 | 1.933 | 0.0857 | 1.02E-08 | 4.79E-07 |
| <b>Trefoil factor 3</b>                                                      | 1.993 | 1.574 | 2.524 | 0.12   | 1.02E-08 | 4.79E-07 |
| <b>Ran-binding protein 3</b>                                                 | 1.9   | 1.525 | 2.368 | 0.112  | 1.04E-08 | 4.84E-07 |
| <b>Hexokinase-1</b>                                                          | 0.362 | 0.255 | 0.513 | 0.178  | 1.13E-08 | 5.20E-07 |
| <b>Trefoil factor 2</b>                                                      | 1.66  | 1.395 | 1.975 | 0.0888 | 1.14E-08 | 5.21E-07 |
| <b>Leukocyte immunoglobulin-like receptor subfamily A member 5</b>           | 2.042 | 1.597 | 2.61  | 0.125  | 1.20E-08 | 5.45E-07 |
| <b>Thioredoxin-interacting protein</b>                                       | 0.412 | 0.304 | 0.56  | 0.156  | 1.37E-08 | 6.17E-07 |
| <b>Mannan-binding lectin serine protease 1</b>                               | 0.221 | 0.131 | 0.373 | 0.267  | 1.50E-08 | 6.69E-07 |
| <b>Alpha-2-antiplasmin</b>                                                   | 0.388 | 0.279 | 0.538 | 0.168  | 1.54E-08 | 6.77E-07 |
| <b>Serum amyloid A-1 protein</b>                                             | 1.26  | 1.163 | 1.366 | 0.0409 | 1.57E-08 | 6.86E-07 |
| <b>Rho GTPase-activating protein 1</b>                                       | 1.862 | 1.501 | 2.31  | 0.11   | 1.60E-08 | 6.90E-07 |
| <b>Fructose-bisphosphate aldolase C</b>                                      | 0.517 | 0.411 | 0.65  | 0.117  | 1.61E-08 | 6.90E-07 |
| <b>Kininogen-1</b>                                                           | 0.228 | 0.137 | 0.382 | 0.262  | 1.72E-08 | 7.32E-07 |
| <b>Potassium voltage-gated channel subfamily E regulatory beta subunit 5</b> | 0.352 | 0.245 | 0.507 | 0.185  | 1.78E-08 | 7.52E-07 |
| <b>Glycerol-3-phosphate dehydrogenase [NAD(+)], cytoplasmic</b>              | 0.663 | 0.574 | 0.765 | 0.0732 | 1.82E-08 | 7.63E-07 |
| <b>Pyrroline-5-carboxylate reductase 2</b>                                   | 0.277 | 0.177 | 0.433 | 0.228  | 1.85E-08 | 7.67E-07 |
| <b>CD27 antigen</b>                                                          | 0.414 | 0.304 | 0.563 | 0.157  | 1.92E-08 | 7.88E-07 |
| <b>Protein Wnt-3a</b>                                                        | 0.48  | 0.371 | 0.62  | 0.131  | 2.10E-08 | 8.57E-07 |
| <b>Vesicular integral-membrane protein VIP36</b>                             | 2.72  | 1.915 | 3.864 | 0.179  | 2.26E-08 | 9.14E-07 |
| <b>Adhesion G protein-coupled receptor E2</b>                                | 0.618 | 0.522 | 0.732 | 0.0861 | 2.30E-08 | 9.23E-07 |
| <b>Leucine-rich repeat-containing protein 74A</b>                            | 0.296 | 0.194 | 0.454 | 0.218  | 2.32E-08 | 9.25E-07 |
| <b>Tenascin</b>                                                              | 2.362 | 1.747 | 3.193 | 0.154  | 2.37E-08 | 9.36E-07 |
| <b>Macrophage metalloelastase</b>                                            | 1.56  | 1.334 | 1.823 | 0.0797 | 2.43E-08 | 9.52E-07 |
| <b>Fibrinogen-like protein 1</b>                                             | 1.514 | 1.308 | 1.752 | 0.0745 | 2.61E-08 | 1.01E-06 |
| <b>Valine--tRNA ligase</b>                                                   | 0.476 | 0.366 | 0.618 | 0.134  | 2.67E-08 | 1.03E-06 |
| <b>Ephrin type-A receptor 2</b>                                              | 1.996 | 1.564 | 2.546 | 0.124  | 2.74E-08 | 1.05E-06 |
| <b>Follistatin-related protein 1</b>                                         | 4.46  | 2.628 | 7.57  | 0.27   | 3.04E-08 | 1.16E-06 |
| <b>Liver carboxylesterase 1</b>                                              | 0.482 | 0.372 | 0.624 | 0.132  | 3.07E-08 | 1.16E-06 |
| <b>Fructose-bisphosphate aldolase B</b>                                      | 0.69  | 0.605 | 0.787 | 0.0673 | 3.45E-08 | 1.29E-06 |

|                                                                               |       |       |       |        |          |          |
|-------------------------------------------------------------------------------|-------|-------|-------|--------|----------|----------|
| <b>Marginal zone B- and B1-cell-specific protein</b>                          | 1.639 | 1.375 | 1.954 | 0.0897 | 3.66E-08 | 1.36E-06 |
| <b>Iron-sulfur cluster co-chaperone protein HscB, mitochondrial</b>           | 0.397 | 0.286 | 0.551 | 0.168  | 3.70E-08 | 1.36E-06 |
| <b>Endothelial differentiation-related factor 1</b>                           | 0.412 | 0.3   | 0.565 | 0.161  | 3.76E-08 | 1.37E-06 |
| <b>Carbohydrate sulfotransferase 12</b>                                       | 2.191 | 1.657 | 2.897 | 0.143  | 3.76E-08 | 1.37E-06 |
| <b>Acyl-CoA-binding domain-containing protein 6</b>                           | 2.341 | 1.729 | 3.169 | 0.155  | 3.79E-08 | 1.37E-06 |
| <b>CD59 glycoprotein</b>                                                      | 2.101 | 1.612 | 2.737 | 0.135  | 3.88E-08 | 1.39E-06 |
| <b>Hemoglobin subunit delta</b>                                               | 0.345 | 0.236 | 0.505 | 0.194  | 4.08E-08 | 1.45E-06 |
| <b>Regulator of G-protein signaling 8</b>                                     | 0.406 | 0.294 | 0.56  | 0.165  | 4.23E-08 | 1.49E-06 |
| <b>Tumor necrosis factor ligand superfamily member 14</b>                     | 0.327 | 0.219 | 0.488 | 0.204  | 4.38E-08 | 1.53E-06 |
| <b>Protein delta homolog 2</b>                                                | 1.736 | 1.425 | 2.116 | 0.101  | 4.62E-08 | 1.61E-06 |
| <b>Interleukin-1 receptor type 2</b>                                          | 0.386 | 0.274 | 0.544 | 0.175  | 5.06E-08 | 1.75E-06 |
| <b>Aminoacylase-1</b>                                                         | 0.708 | 0.626 | 0.802 | 0.0633 | 5.18E-08 | 1.78E-06 |
| <b>Peroxidasin homolog</b>                                                    | 1.594 | 1.347 | 1.886 | 0.086  | 5.98E-08 | 2.04E-06 |
| <b>Apolipoprotein F</b>                                                       | 1.569 | 1.333 | 1.847 | 0.0832 | 6.10E-08 | 2.07E-06 |
| <b>Tyrosine-protein kinase transmembrane receptor ROR2</b>                    | 1.811 | 1.46  | 2.246 | 0.11   | 6.46E-08 | 2.17E-06 |
| <b>Alpha-1,6-mannosyl-glycoprotein 2-beta-N-acetylglucosaminyltransferase</b> | 0.295 | 0.189 | 0.459 | 0.226  | 6.60E-08 | 2.21E-06 |
| <b>SAM pointed domain-containing Ets transcription factor</b>                 | 0.254 | 0.154 | 0.418 | 0.254  | 6.94E-08 | 2.30E-06 |
| <b>Pulmonary surfactant-associated protein D</b>                              | 1.49  | 1.289 | 1.722 | 0.074  | 7.19E-08 | 2.37E-06 |
| <b>Cyclic AMP-dependent transcription factor ATF-6 alpha</b>                  | 0.375 | 0.263 | 0.537 | 0.182  | 7.67E-08 | 2.50E-06 |
| <b>Tumor necrosis factor receptor type 1-associated DEATH domain protein</b>  | 0.551 | 0.443 | 0.685 | 0.111  | 7.69E-08 | 2.50E-06 |
| <b>Transcription regulator protein BACH1</b>                                  | 0.351 | 0.24  | 0.515 | 0.195  | 8.00E-08 | 2.59E-06 |
| <b>Ras-related protein Rab-17</b>                                             | 0.467 | 0.354 | 0.617 | 0.142  | 8.08E-08 | 2.60E-06 |
| <b>Lysozyme C</b>                                                             | 1.766 | 1.435 | 2.174 | 0.106  | 8.19E-08 | 2.61E-06 |
| <b>OTU domain-containing protein 5</b>                                        | 0.566 | 0.46  | 0.697 | 0.106  | 8.51E-08 | 2.70E-06 |
| <b>Complement component C1q receptor</b>                                      | 2.689 | 1.87  | 3.867 | 0.185  | 9.46E-08 | 2.96E-06 |
| <b>Inhibin beta A chain:Inhibin beta B chain heterodimer</b>                  | 1.826 | 1.464 | 2.277 | 0.113  | 9.41E-08 | 2.96E-06 |
| <b>Biotinidase</b>                                                            | 0.376 | 0.262 | 0.539 | 0.184  | 9.94E-08 | 3.09E-06 |
| <b>Guanylate-binding protein 6</b>                                            | 0.422 | 0.307 | 0.579 | 0.162  | 1.01E-07 | 3.12E-06 |
| <b>Apolipoprotein A-IV</b>                                                    | 0.668 | 0.576 | 0.775 | 0.0757 | 1.02E-07 | 3.12E-06 |
| <b>Neuropeptide S</b>                                                         | 0.513 | 0.401 | 0.657 | 0.126  | 1.15E-07 | 3.50E-06 |
| <b>Endothelin-converting enzyme 1</b>                                         | 0.303 | 0.194 | 0.471 | 0.226  | 1.19E-07 | 3.62E-06 |
| <b>Glutaminy-peptide cyclotransferase</b>                                     | 1.655 | 1.373 | 1.995 | 0.0952 | 1.21E-07 | 3.64E-06 |
| <b>Growth arrest-specific protein 1</b>                                       | 2.004 | 1.549 | 2.593 | 0.131  | 1.22E-07 | 3.67E-06 |
| <b>Heat shock 70 kDa protein 6</b>                                            | 0.199 | 0.11  | 0.363 | 0.305  | 1.24E-07 | 3.69E-06 |

|                                                                    |           |       |       |        |              |          |
|--------------------------------------------------------------------|-----------|-------|-------|--------|--------------|----------|
| <b>Fc receptor-like protein 6</b>                                  | 0.3<br>14 | 0.205 | 0.483 | 0.219  | 1.26E-<br>07 | 3.74E-06 |
| <b>Syntaxin-binding protein 6</b>                                  | 0.5<br>04 | 0.39  | 0.65  | 0.13   | 1.36E-<br>07 | 4.00E-06 |
| <b>IGF-like family receptor 1</b>                                  | 1.5<br>4  | 1.311 | 1.808 | 0.0819 | 1.39E-<br>07 | 4.07E-06 |
| <b>Alpha-N-acetylgalactosaminide alpha-2,6-sialyltransferase 1</b> | 0.3<br>98 | 0.282 | 0.561 | 0.175  | 1.41E-<br>07 | 4.11E-06 |
| <b>SLAM family member 8</b>                                        | 1.4<br>56 | 1.265 | 1.674 | 0.0714 | 1.47E-<br>07 | 4.25E-06 |
| <b>B melanoma antigen 3</b>                                        | 0.5<br>14 | 0.401 | 0.659 | 0.127  | 1.51E-<br>07 | 4.36E-06 |
| <b>Leucine-rich repeat-containing G-protein coupled receptor 5</b> | 0.3<br>1  | 0.2   | 0.48  | 0.223  | 1.52E-<br>07 | 4.36E-06 |
| <b>Protocadherin gamma-C3</b>                                      | 0.6<br>58 | 0.562 | 0.769 | 0.0801 | 1.65E-<br>07 | 4.58E-06 |
| <b>14-3-3 protein gamma</b>                                        | 1.8<br>61 | 1.475 | 2.348 | 0.119  | 1.64E-<br>07 | 4.58E-06 |
| <b>Zinc finger protein 175</b>                                     | 0.2<br>57 | 0.154 | 0.427 | 0.26   | 1.62E-<br>07 | 4.58E-06 |
| <b>Interleukin-37</b>                                              | 0.4<br>9  | 0.376 | 0.64  | 0.136  | 1.63E-<br>07 | 4.58E-06 |
| <b>Cysteine-rich PDZ-binding protein</b>                           | 0.3<br>97 | 0.28  | 0.561 | 0.177  | 1.64E-<br>07 | 4.58E-06 |
| <b>Histone-lysine N-methyltransferase EHMT2</b>                    | 0.4<br>87 | 0.372 | 0.638 | 0.137  | 1.65E-<br>07 | 4.58E-06 |
| <b>Cytochrome c oxidase subunit 4 isoform 2, mitochondrial</b>     | 0.3<br>94 | 0.278 | 0.559 | 0.178  | 1.67E-<br>07 | 4.60E-06 |
| <b>Myelin regulatory factor</b>                                    | 0.3<br>09 | 0.199 | 0.48  | 0.225  | 1.71E-<br>07 | 4.67E-06 |
| <b>Carboxypeptidase E</b>                                          | 0.3<br>29 | 0.216 | 0.499 | 0.213  | 1.75E-<br>07 | 4.76E-06 |
| <b>Phosphoenolpyruvate carboxykinase, cytosolic [GTP]</b>          | 0.4<br>43 | 0.326 | 0.602 | 0.156  | 1.91E-<br>07 | 5.17E-06 |
| <b>Apolipoprotein M</b>                                            | 0.4<br>12 | 0.295 | 0.575 | 0.17   | 1.97E-<br>07 | 5.30E-06 |
| <b>Fructose-1,6-bisphosphatase 1</b>                               | 0.6<br>91 | 0.6   | 0.794 | 0.0713 | 2.10E-<br>07 | 5.61E-06 |
| <b>Anthrax toxin receptor 2</b>                                    | 0.5<br>43 | 0.431 | 0.684 | 0.118  | 2.19E-<br>07 | 5.79E-06 |
| <b>Protein shisa-2 homolog</b>                                     | 0.3<br>81 | 0.264 | 0.549 | 0.186  | 2.19E-<br>07 | 5.79E-06 |
| <b>Retinoblastoma-like protein 2</b>                               | 1.8<br>62 | 1.472 | 2.355 | 0.12   | 2.20E-<br>07 | 5.80E-06 |
| <b>Suppressor of fused homolog</b>                                 | 0.2<br>4  | 0.14  | 0.413 | 0.276  | 2.37E-<br>07 | 6.19E-06 |
| <b>Tenascin</b>                                                    | 1.8<br>81 | 1.48  | 2.39  | 0.122  | 2.37E-<br>07 | 6.19E-06 |
| <b>Chymotrypsin-like protease CTRL-1</b>                           | 0.4<br>35 | 0.317 | 0.597 | 0.161  | 2.44E-<br>07 | 6.33E-06 |
| <b>Metalloproteinase inhibitor 1</b>                               | 2.2<br>92 | 1.672 | 3.14  | 0.161  | 2.48E-<br>07 | 6.40E-06 |
| <b>Fatty acid-binding protein, adipocyte</b>                       | 1.6<br>85 | 1.382 | 2.055 | 0.101  | 2.58E-<br>07 | 6.63E-06 |
| <b>Rho GTPase-activating protein 1</b>                             | 1.4<br>76 | 1.272 | 1.713 | 0.0759 | 2.82E-<br>07 | 7.20E-06 |
| <b>CD48 antigen</b>                                                | 1.9<br>62 | 1.517 | 2.538 | 0.131  | 2.85E-<br>07 | 7.25E-06 |
| <b>Beta-klotho</b>                                                 | 0.5<br>65 | 0.454 | 0.703 | 0.111  | 2.92E-<br>07 | 7.38E-06 |
| <b>Thrombospondin-2</b>                                            | 1.4<br>06 | 1.234 | 1.603 | 0.0667 | 3.11E-<br>07 | 7.83E-06 |
| <b>Inactive gamma-glutamyltranspeptidase 2</b>                     | 0.6<br>96 | 0.605 | 0.799 | 0.071  | 3.14E-<br>07 | 7.84E-06 |
| <b>Proteasome subunit alpha type-1</b>                             | 0.3<br>75 | 0.258 | 0.547 | 0.192  | 3.17E-<br>07 | 7.84E-06 |
| <b>Hedgehog-interacting protein</b>                                | 0.3<br>59 | 0.243 | 0.532 | 0.2    | 3.16E-<br>07 | 7.84E-06 |

|                                                            |       |       |       |        |          |          |
|------------------------------------------------------------|-------|-------|-------|--------|----------|----------|
| <b>Baculoviral IAP repeat-containing protein 5</b>         | 0.282 | 0.174 | 0.458 | 0.248  | 3.20E-07 | 7.90E-06 |
| <b>Interleukin-36 receptor antagonist protein</b>          | 0.608 | 0.502 | 0.736 | 0.0974 | 3.30E-07 | 8.10E-06 |
| <b>Noelin</b>                                              | 1.585 | 1.328 | 1.893 | 0.0905 | 3.51E-07 | 8.53E-06 |
| <b>Complement component C7</b>                             | 3.126 | 2.016 | 4.848 | 0.224  | 3.51E-07 | 8.53E-06 |
| <b>Adapter molecule crk</b>                                | 1.43  | 1.245 | 1.642 | 0.0706 | 4.04E-07 | 9.76E-06 |
| <b>Heat shock protein beta-6</b>                           | 1.731 | 1.4   | 2.14  | 0.108  | 4.07E-07 | 9.80E-06 |
| <b>Neuroendocrine protein 7B2</b>                          | 0.614 | 0.509 | 0.742 | 0.0962 | 4.12E-07 | 9.86E-06 |
| <b>Discoidin domain-containing receptor 2</b>              | 1.619 | 1.342 | 1.952 | 0.0957 | 4.78E-07 | 1.14E-05 |
| <b>Ficolin-3</b>                                           | 0.575 | 0.463 | 0.713 | 0.11   | 4.84E-07 | 1.14E-05 |
| <b>PTB domain-containing engulfment adapter protein 1</b>  | 0.449 | 0.329 | 0.613 | 0.159  | 4.80E-07 | 1.14E-05 |
| <b>Oncostatin-M</b>                                        | 0.568 | 0.456 | 0.708 | 0.112  | 4.82E-07 | 1.14E-05 |
| <b>Kinesin-like protein KIF16B</b>                         | 0.311 | 0.198 | 0.491 | 0.232  | 5.06E-07 | 1.18E-05 |
| <b>Frizzled-10</b>                                         | 0.42  | 0.299 | 0.589 | 0.173  | 5.18E-07 | 1.21E-05 |
| <b>Phosphatidylinositol transfer protein beta isoform</b>  | 0.345 | 0.228 | 0.523 | 0.212  | 5.29E-07 | 1.22E-05 |
| <b>Coagulation factor Xa</b>                               | 0.581 | 0.47  | 0.718 | 0.108  | 5.40E-07 | 1.24E-05 |
| <b>Microfibrillar-associated protein 2</b>                 | 1.806 | 1.433 | 2.275 | 0.118  | 5.49E-07 | 1.26E-05 |
| <b>Radiation-inducible immediate-early gene IEX-1</b>      | 0.352 | 0.234 | 0.53  | 0.209  | 5.54E-07 | 1.27E-05 |
| <b>Ras-related and estrogen-regulated growth inhibitor</b> | 0.27  | 0.162 | 0.451 | 0.262  | 5.68E-07 | 1.28E-05 |
| <b>U6 snRNA-associated Sm-like protein LSm4</b>            | 0.379 | 0.259 | 0.554 | 0.194  | 5.66E-07 | 1.28E-05 |
| <b>Semaphorin-6B</b>                                       | 2.099 | 1.57  | 2.807 | 0.148  | 5.65E-07 | 1.28E-05 |
| <b>Cartilage intermediate layer protein 2</b>              | 0.555 | 0.441 | 0.699 | 0.118  | 5.85E-07 | 1.31E-05 |
| <b>Protein MENT</b>                                        | 0.546 | 0.43  | 0.692 | 0.121  | 5.87E-07 | 1.31E-05 |
| <b>SPARC-related modular calcium-binding protein 2</b>     | 2.223 | 1.624 | 3.043 | 0.16   | 6.06E-07 | 1.35E-05 |
| <b>Troponin I, fast skeletal muscle</b>                    | 1.382 | 1.217 | 1.57  | 0.065  | 6.23E-07 | 1.38E-05 |
| <b>Butyrophilin subfamily 3 member A3</b>                  | 1.701 | 1.38  | 2.096 | 0.107  | 6.37E-07 | 1.40E-05 |
| <b>Hematopoietic prostaglandin D synthase</b>              | 0.542 | 0.425 | 0.689 | 0.123  | 6.39E-07 | 1.40E-05 |
| <b>Sialic acid-binding Ig-like lectin 12</b>               | 0.447 | 0.325 | 0.613 | 0.162  | 6.49E-07 | 1.41E-05 |
| <b>Tenascin</b>                                            | 1.954 | 1.501 | 2.544 | 0.135  | 6.50E-07 | 1.41E-05 |
| <b>Kallistatin</b>                                         | 0.278 | 0.168 | 0.46  | 0.257  | 6.52E-07 | 1.41E-05 |
| <b>Ubiquitin D</b>                                         | 0.276 | 0.166 | 0.458 | 0.259  | 6.61E-07 | 1.43E-05 |
| <b>Beta-defensin 132</b>                                   | 0.557 | 0.443 | 0.702 | 0.118  | 6.67E-07 | 1.43E-05 |
| <b>Heparan-sulfate 6-O-sulfotransferase 2</b>              | 1.683 | 1.37  | 2.067 | 0.105  | 6.91E-07 | 1.48E-05 |
| <b>G-protein coupled receptor 26</b>                       | 0.361 | 0.242 | 0.54  | 0.205  | 7.04E-07 | 1.49E-05 |
| <b>Melanoma-associated antigen 5</b>                       | 0.614 | 0.507 | 0.745 | 0.0982 | 7.05E-07 | 1.49E-05 |

|                                                                   |           |       |       |        |          |          |
|-------------------------------------------------------------------|-----------|-------|-------|--------|----------|----------|
| <b>Insulin-like growth factor-binding protein 7</b>               | 2.3<br>73 | 1.685 | 3.342 | 0.175  | 7.48E-07 | 1.58E-05 |
| <b>Insulin growth factor-like family member 3</b>                 | 0.4<br>97 | 0.377 | 0.656 | 0.141  | 7.55E-07 | 1.59E-05 |
| <b>IQ domain-containing protein F1</b>                            | 0.3<br>6  | 0.24  | 0.54  | 0.207  | 7.74E-07 | 1.62E-05 |
| <b>Growth/differentiation factor 11/8</b>                         | 0.4<br>62 | 0.34  | 0.628 | 0.157  | 8.18E-07 | 1.70E-05 |
| <b>Oxidized Protein deglycase DJ-1</b>                            | 0.4<br>62 | 0.339 | 0.628 | 0.157  | 8.35E-07 | 1.73E-05 |
| <b>Alpha-parvin</b>                                               | 1.6<br>28 | 1.341 | 1.976 | 0.0989 | 8.53E-07 | 1.76E-05 |
| <b>Galanin</b>                                                    | 0.2<br>68 | 0.158 | 0.453 | 0.269  | 9.44E-07 | 1.94E-05 |
| <b>Very low-density lipoprotein receptor</b>                      | 0.4<br>34 | 0.311 | 0.606 | 0.17   | 9.64E-07 | 1.97E-05 |
| <b>Kininogen, HMW, Two Chain</b>                                  | 0.6<br>31 | 0.524 | 0.759 | 0.0943 | 1.02E-06 | 2.07E-05 |
| <b>Urotensin-2</b>                                                | 0.4<br>44 | 0.32  | 0.614 | 0.166  | 1.02E-06 | 2.07E-05 |
| <b>Ceruloplasmin</b>                                              | 0.4<br>64 | 0.341 | 0.631 | 0.157  | 1.02E-06 | 2.07E-05 |
| <b>Microfibril-associated glycoprotein 4</b>                      | 1.5<br>35 | 1.293 | 1.824 | 0.0878 | 1.04E-06 | 2.09E-05 |
| <b>Colipase-like protein 2</b>                                    | 0.3<br>66 | 0.244 | 0.548 | 0.206  | 1.07E-06 | 2.15E-05 |
| <b>Kynurenine--oxoglutarate transaminase 1</b>                    | 0.2<br>94 | 0.18  | 0.481 | 0.251  | 1.09E-06 | 2.18E-05 |
| <b>Dual specificity mitogen-activated protein kinase kinase 1</b> | 1.5<br>96 | 1.322 | 1.927 | 0.0961 | 1.13E-06 | 2.25E-05 |
| <b>Mucin-16</b>                                                   | 1.4<br>26 | 1.236 | 1.646 | 0.073  | 1.16E-06 | 2.30E-05 |
| <b>Neuromedin-B</b>                                               | 1.8<br>12 | 1.425 | 2.304 | 0.122  | 1.21E-06 | 2.40E-05 |
| <b>T-lymphocyte surface antigen Ly-9</b>                          | 1.7<br>54 | 1.398 | 2.201 | 0.116  | 1.23E-06 | 2.41E-05 |
| <b>BPI fold-containing family A member 2</b>                      | 0.6<br>08 | 0.497 | 0.743 | 0.103  | 1.26E-06 | 2.46E-05 |
| <b>Peregrin</b>                                                   | 0.2<br>85 | 0.172 | 0.474 | 0.259  | 1.30E-06 | 2.54E-05 |
| <b>Fibroblast growth factor 23</b>                                | 1.4<br>42 | 1.243 | 1.673 | 0.0757 | 1.33E-06 | 2.58E-05 |
| <b>Prostaglandin-H2 D-isomerase</b>                               | 2.0<br>05 | 1.512 | 2.66  | 0.144  | 1.37E-06 | 2.65E-05 |
| <b>Hepatitis A virus cellular receptor 1</b>                      | 1.2<br>97 | 1.167 | 1.442 | 0.0539 | 1.37E-06 | 2.65E-05 |
| <b>C1GALT1-specific chaperone 1</b>                               | 0.4<br>92 | 0.369 | 0.656 | 0.147  | 1.38E-06 | 2.66E-05 |
| <b>Neurexophilin-2</b>                                            | 0.6<br>93 | 0.597 | 0.804 | 0.0762 | 1.42E-06 | 2.73E-05 |
| <b>Ribonuclease K6</b>                                            | 1.5<br>79 | 1.311 | 1.901 | 0.0948 | 1.46E-06 | 2.79E-05 |
| <b>Atrial natriuretic factor</b>                                  | 1.7<br>12 | 1.375 | 2.131 | 0.112  | 1.51E-06 | 2.86E-05 |
| <b>R-spondin-1</b>                                                | 1.6<br>26 | 1.334 | 1.982 | 0.101  | 1.52E-06 | 2.87E-05 |
| <b>BPI fold-containing family A member 1</b>                      | 0.3<br>45 | 0.223 | 0.533 | 0.222  | 1.66E-06 | 3.12E-05 |
| <b>2'-deoxynucleoside 5'-phosphate N-hydrolase 1</b>              | 0.3<br>55 | 0.233 | 0.543 | 0.216  | 1.66E-06 | 3.12E-05 |
| <b>Collagen alpha-1(XV) chain</b>                                 | 2.4<br>76 | 1.708 | 3.588 | 0.189  | 1.69E-06 | 3.15E-05 |
| <b>Nuclear pore complex-interacting protein family member B3</b>  | 0.3<br>98 | 0.273 | 0.58  | 0.192  | 1.69E-06 | 3.15E-05 |
| <b>Early endosome antigen 1</b>                                   | 0.3<br>81 | 0.257 | 0.566 | 0.202  | 1.70E-06 | 3.15E-05 |
| <b>Neuronal pentraxin-2</b>                                       | 0.4<br>36 | 0.31  | 0.613 | 0.174  | 1.81E-06 | 3.36E-05 |

|                                                                         |           |       |       |        |          |          |
|-------------------------------------------------------------------------|-----------|-------|-------|--------|----------|----------|
| <b>Secreted frizzled-related protein 2</b>                              | 0.3<br>21 | 0.201 | 0.512 | 0.238  | 1.88E-06 | 3.47E-05 |
| <b>Cyclic AMP-responsive element-binding protein 3-like protein 4</b>   | 1.9<br>82 | 1.494 | 2.63  | 0.144  | 2.12E-06 | 3.89E-05 |
| <b>Tartrate-resistant acid phosphatase type 5</b>                       | 0.4<br>7  | 0.344 | 0.642 | 0.16   | 2.18E-06 | 3.99E-05 |
| <b>Rap guanine nucleotide exchange factor 5</b>                         | 0.4<br>9  | 0.364 | 0.658 | 0.151  | 2.26E-06 | 4.11E-05 |
| <b>Cathepsin H</b>                                                      | 1.6<br>16 | 1.324 | 1.972 | 0.102  | 2.26E-06 | 4.11E-05 |
| <b>Hephaestin-like protein 1</b>                                        | 0.2<br>61 | 0.15  | 0.456 | 0.284  | 2.27E-06 | 4.12E-05 |
| <b>Leukocyte cell-derived chemotaxin-2</b>                              | 0.6<br>68 | 0.565 | 0.79  | 0.0855 | 2.39E-06 | 4.31E-05 |
| <b>Troponin T, fast skeletal muscle</b>                                 | 0.4<br>56 | 0.329 | 0.632 | 0.167  | 2.49E-06 | 4.47E-05 |
| <b>Bone morphogenetic protein 7</b>                                     | 1.7<br>91 | 1.405 | 2.284 | 0.124  | 2.56E-06 | 4.58E-05 |
| <b>Bone morphogenetic protein 4</b>                                     | 1.6<br>98 | 1.362 | 2.118 | 0.113  | 2.61E-06 | 4.65E-05 |
| <b>Ectonucleotide pyrophosphatase/phosphodiesterase family member 5</b> | 0.6<br>27 | 0.516 | 0.762 | 0.0996 | 2.83E-06 | 5.04E-05 |
| <b>Keratin-associated protein 2-4</b>                                   | 1.6<br>94 | 1.359 | 2.113 | 0.113  | 2.88E-06 | 5.09E-05 |
| <b>Transmembrane protein 185A</b>                                       | 0.4<br>23 | 0.295 | 0.606 | 0.184  | 2.88E-06 | 5.09E-05 |
| <b>Brorin</b>                                                           | 1.8<br>55 | 1.432 | 2.403 | 0.132  | 2.91E-06 | 5.12E-05 |
| <b>Mannosyl-oligosaccharide 1,2-alpha-mannosidase 1B</b>                | 0.4<br>45 | 0.316 | 0.625 | 0.174  | 3.10E-06 | 5.44E-05 |
| <b>Coagulation Factor X</b>                                             | 0.5<br>9  | 0.473 | 0.737 | 0.113  | 3.18E-06 | 5.56E-05 |
| <b>Cytosolic non-specific dipeptidase</b>                               | 0.4<br>66 | 0.338 | 0.643 | 0.164  | 3.24E-06 | 5.64E-05 |
| <b>Oral cancer-overexpressed protein 1</b>                              | 0.6<br>75 | 0.571 | 0.797 | 0.0849 | 3.55E-06 | 6.16E-05 |
| <b>Insulin-like growth factor-binding protein 6</b>                     | 2.9<br>5  | 1.867 | 4.661 | 0.233  | 3.58E-06 | 6.18E-05 |
| <b>Forkhead box protein J2</b>                                          | 1.3<br>14 | 1.171 | 1.475 | 0.0589 | 3.59E-06 | 6.19E-05 |
| <b>Mast cell-expressed membrane protein 1</b>                           | 0.4<br>21 | 0.292 | 0.607 | 0.187  | 3.66E-06 | 6.28E-05 |
| <b>BMP and activin membrane-bound inhibitor homolog</b>                 | 1.5<br>69 | 1.296 | 1.9   | 0.0975 | 3.77E-06 | 6.43E-05 |
| <b>A-kinase anchor protein 7 isoforms alpha and beta</b>                | 0.3<br>51 | 0.225 | 0.547 | 0.226  | 3.77E-06 | 6.43E-05 |
| <b>Beta-crystallin B1</b>                                               | 1.4<br>05 | 1.216 | 1.622 | 0.0735 | 3.81E-06 | 6.48E-05 |
| <b>Retinoblastoma-associated protein</b>                                | 0.3<br>33 | 0.209 | 0.531 | 0.238  | 3.86E-06 | 6.53E-05 |
| <b>Trefoil factor 3</b>                                                 | 1.7<br>01 | 1.357 | 2.131 | 0.115  | 3.94E-06 | 6.66E-05 |
| <b>Zinc transporter 3</b>                                               | 0.5<br>68 | 0.446 | 0.722 | 0.123  | 4.08E-06 | 6.86E-05 |
| <b>Secreted frizzled-related protein 1</b>                              | 1.5<br>61 | 1.292 | 1.888 | 0.0968 | 4.17E-06 | 6.99E-05 |
| <b>Activin receptor type-2A</b>                                         | 0.3<br>53 | 0.227 | 0.55  | 0.226  | 4.25E-06 | 7.11E-05 |
| <b>Monocyte differentiation antigen CD14, soluble</b>                   | 3.0<br>45 | 1.893 | 4.897 | 0.242  | 4.38E-06 | 7.29E-05 |
| <b>Myotubularin-related protein 1</b>                                   | 0.3<br>56 | 0.229 | 0.554 | 0.225  | 4.54E-06 | 7.54E-05 |
| <b>Peptidase inhibitor 15</b>                                           | 0.2<br>84 | 0.166 | 0.487 | 0.275  | 4.60E-06 | 7.61E-05 |
| <b>Tenascin</b>                                                         | 1.9<br>39 | 1.46  | 2.575 | 0.145  | 4.69E-06 | 7.74E-05 |
| <b>Eukaryotic initiation factor 4A-I</b>                                | 1.2<br>63 | 1.142 | 1.396 | 0.0512 | 5.05E-06 | 8.29E-05 |

|                                                                          |       |       |       |        |          |             |
|--------------------------------------------------------------------------|-------|-------|-------|--------|----------|-------------|
| Scavenger receptor class A member 5                                      | 1.569 | 1.293 | 1.904 | 0.0988 | 5.12E-06 | 8.38E-05    |
| Interleukin-7                                                            | 1.608 | 1.31  | 1.973 | 0.104  | 5.41E-06 | 8.84E-05    |
| ATP synthase subunit beta, mitochondrial                                 | 0.542 | 0.416 | 0.706 | 0.135  | 5.62E-06 | 9.14E-05    |
| Transcription initiation factor TFIIID subunit 10                        | 0.534 | 0.407 | 0.7   | 0.139  | 5.87E-06 | 9.51E-05    |
| Hexokinase-3                                                             | 0.395 | 0.264 | 0.591 | 0.205  | 5.95E-06 | 9.62E-05    |
| Complement factor H-related protein 5                                    | 2.255 | 1.586 | 3.207 | 0.18   | 6.00E-06 | 9.66E-05    |
| Neutrophil gelatinase-associated lipocalin                               | 1.691 | 1.347 | 2.123 | 0.116  | 6.04E-06 | 9.68E-05    |
| Serine/threonine-protein kinase receptor R3                              | 1.429 | 1.224 | 1.668 | 0.0789 | 6.04E-06 | 9.68E-05    |
| Zymogen granule protein 16 homolog B                                     | 1.383 | 1.202 | 1.592 | 0.0717 | 6.20E-06 | 9.90E-05    |
| Microtubule-associated proteins 1A/1B light chain 3A                     | 1.484 | 1.25  | 1.761 | 0.0873 | 6.28E-06 | 1.00E-04    |
| Triggering receptor expressed on myeloid cells 1                         | 1.712 | 1.355 | 2.163 | 0.119  | 6.53E-06 | 0.000103581 |
| T-cell antigen CD7                                                       | 1.37  | 1.195 | 1.571 | 0.0698 | 6.57E-06 | 0.000103773 |
| Beta-Ala-His dipeptidase                                                 | 0.782 | 0.703 | 0.87  | 0.0545 | 6.59E-06 | 0.000103904 |
| Aldo-keto reductase family 1 member B10                                  | 0.721 | 0.625 | 0.831 | 0.0726 | 6.69E-06 | 0.00010502  |
| Carboxypeptidase N subunit 2                                             | 0.428 | 0.296 | 0.62  | 0.188  | 6.86E-06 | 0.000107413 |
| Macrophage-stimulating protein receptor                                  | 0.468 | 0.336 | 0.651 | 0.169  | 6.98E-06 | 0.000108212 |
| Cyclin-dependent kinase 5:Cyclin-dependent kinase 5 activator 1 complex  | 0.596 | 0.476 | 0.747 | 0.115  | 6.97E-06 | 0.000108212 |
| Protein S100-A13                                                         | 1.404 | 1.211 | 1.628 | 0.0755 | 6.96E-06 | 0.000108212 |
| Pappalysin-1                                                             | 1.512 | 1.263 | 1.812 | 0.0921 | 7.06E-06 | 0.000109096 |
| Sorbitol dehydrogenase                                                   | 0.747 | 0.657 | 0.849 | 0.0651 | 7.41E-06 | 0.000113821 |
| Leucine-rich repeat and fibronectin type-III domain-containing protein 5 | 0.536 | 0.408 | 0.704 | 0.139  | 7.41E-06 | 0.000113821 |
| Angiostatin                                                              | 0.352 | 0.223 | 0.556 | 0.233  | 7.56E-06 | 0.000115491 |
| Myosin regulatory light chain 2, atrial isoform                          | 0.559 | 0.433 | 0.721 | 0.13   | 7.58E-06 | 0.000115491 |
| Tyrosine-protein kinase ZAP-70                                           | 0.689 | 0.585 | 0.811 | 0.0833 | 7.56E-06 | 0.000115491 |
| Retinal dehydrogenase 1                                                  | 0.735 | 0.642 | 0.841 | 0.0688 | 7.82E-06 | 0.000118726 |
| Zinc finger protein 276                                                  | 0.626 | 0.51  | 0.769 | 0.105  | 8.29E-06 | 0.000125446 |
| Plasma kallikrein                                                        | 0.356 | 0.226 | 0.56  | 0.232  | 8.42E-06 | 0.000127037 |
| ADP-dependent glucokinase                                                | 2.172 | 1.543 | 3.057 | 0.175  | 8.84E-06 | 0.000133048 |
| tRNA-dihydrouridine(20) synthase [NAD(P)+]-like                          | 0.555 | 0.428 | 0.72  | 0.132  | 8.90E-06 | 0.000133072 |
| Vacuolar protein sorting-associated protein 28 homolog                   | 0.569 | 0.444 | 0.73  | 0.127  | 8.88E-06 | 0.000133072 |
| Protein CASC4                                                            | 1.667 | 1.33  | 2.09  | 0.115  | 9.26E-06 | 0.000138106 |
| Lysosomal acid phosphatase                                               | 1.272 | 1.144 | 1.415 | 0.0544 | 9.41E-06 | 0.000139853 |
| Kallikrein-10                                                            | 1.588 | 1.294 | 1.949 | 0.104  | 9.59E-06 | 0.000142042 |
| Transmembrane emp24 domain-containing protein 10                         | 1.587 | 1.293 | 1.947 | 0.104  | 9.88E-06 | 0.000145992 |

|                                                                                      |           |       |       |        |              |                 |
|--------------------------------------------------------------------------------------|-----------|-------|-------|--------|--------------|-----------------|
| <b>Signaling lymphocytic activation molecule</b>                                     | 1.4<br>82 | 1.245 | 1.764 | 0.089  | 1.00E-<br>05 | 0.00014749<br>6 |
| <b>Selenoprotein S</b>                                                               | 0.5<br>64 | 0.437 | 0.728 | 0.13   | 1.05E-<br>05 | 0.00015434<br>1 |
| <b>TOM1-like protein 2</b>                                                           | 0.5<br>24 | 0.393 | 0.698 | 0.147  | 1.05E-<br>05 | 0.00015434<br>1 |
| <b>Inter-alpha-trypsin inhibitor heavy chain H3</b>                                  | 1.7<br>91 | 1.382 | 2.321 | 0.132  | 1.06E-<br>05 | 0.00015472<br>4 |
| <b>Tumor necrosis factor receptor superfamily member 4</b>                           | 1.7<br>93 | 1.383 | 2.326 | 0.133  | 1.07E-<br>05 | 0.00015585<br>5 |
| <b>Glutathione S-transferase A1</b>                                                  | 0.6<br>27 | 0.509 | 0.772 | 0.106  | 1.08E-<br>05 | 0.00015692      |
| <b>Tropomyosin beta chain</b>                                                        | 0.6<br>65 | 0.555 | 0.798 | 0.0926 | 1.09E-<br>05 | 0.00015692      |
| <b>Histone-lysine N-methyltransferase SUV420H2</b>                                   | 0.3<br>08 | 0.182 | 0.52  | 0.268  | 1.09E-<br>05 | 0.00015692      |
| <b>Dolichyl-diphosphooligosaccharide--protein glycosyltransferase 48 kDa subunit</b> | 1.4<br>44 | 1.226 | 1.702 | 0.0836 | 1.10E-<br>05 | 0.00015774<br>2 |
| <b>Cadherin-11</b>                                                                   | 0.4<br>49 | 0.314 | 0.642 | 0.182  | 1.10E-<br>05 | 0.00015824<br>2 |
| <b>Oligodendrocyte-myelin glycoprotein</b>                                           | 0.7<br>05 | 0.603 | 0.824 | 0.0795 | 1.12E-<br>05 | 0.00016055      |
| <b>Netrin receptor UNC5B</b>                                                         | 1.8<br>15 | 1.391 | 2.369 | 0.136  | 1.14E-<br>05 | 0.00016234<br>2 |
| <b>Arginine/serine-rich protein 1</b>                                                | 1.7<br>34 | 1.355 | 2.218 | 0.126  | 1.19E-<br>05 | 0.00016883<br>5 |
| <b>Ectonucleoside triphosphate diphosphohydrolase 3</b>                              | 0.5<br>76 | 0.45  | 0.737 | 0.126  | 1.21E-<br>05 | 0.00017171<br>7 |
| <b>Secretoglobulin family 3A member 1</b>                                            | 1.3<br>76 | 1.193 | 1.588 | 0.073  | 1.22E-<br>05 | 0.00017197<br>7 |
| <b>Polypeptide N-acetylgalactosaminyltransferase 1</b>                               | 1.7<br>53 | 1.363 | 2.256 | 0.129  | 1.24E-<br>05 | 0.00017527<br>1 |
| <b>Protein zwilch homolog</b>                                                        | 0.4<br>66 | 0.331 | 0.657 | 0.175  | 1.29E-<br>05 | 0.00018026<br>1 |
| <b>Bone morphogenetic protein 6</b>                                                  | 1.6<br>3  | 1.309 | 2.03  | 0.112  | 1.28E-<br>05 | 0.00018026<br>1 |
| <b>Transmembrane protein C1orf162</b>                                                | 0.7<br>68 | 0.683 | 0.865 | 0.0604 | 1.29E-<br>05 | 0.00018030<br>4 |
| <b>Nuclear factor of activated T-cells, cytoplasmic 1</b>                            | 0.4<br>05 | 0.27  | 0.608 | 0.207  | 1.30E-<br>05 | 0.00018096<br>1 |
| <b>Tenomodulin</b>                                                                   | 0.3<br>93 | 0.258 | 0.598 | 0.214  | 1.31E-<br>05 | 0.00018200<br>1 |
| <b>Receptor-type tyrosine-protein kinase FLT3</b>                                    | 0.5<br>56 | 0.427 | 0.725 | 0.135  | 1.35E-<br>05 | 0.00018766<br>4 |
| <b>Endothelial cell-selective adhesion molecule</b>                                  | 1.9<br>03 | 1.423 | 2.544 | 0.148  | 1.42E-<br>05 | 0.00019542<br>7 |
| <b>Sodium channel subunit beta-4</b>                                                 | 0.4<br>85 | 0.35  | 0.673 | 0.167  | 1.41E-<br>05 | 0.00019542<br>7 |
| <b>Four and a half LIM domains protein 1</b>                                         | 0.4<br>68 | 0.332 | 0.659 | 0.175  | 1.45E-<br>05 | 0.00020004<br>7 |
| <b>Coagulation Factor XI</b>                                                         | 0.4<br>41 | 0.305 | 0.639 | 0.189  | 1.46E-<br>05 | 0.00020020<br>2 |
| <b>Chromogranin-A</b>                                                                | 1.6<br>65 | 1.322 | 2.098 | 0.118  | 1.49E-<br>05 | 0.00020355<br>4 |
| <b>Interleukin-1 receptor type 1</b>                                                 | 1.6<br>25 | 1.304 | 2.026 | 0.113  | 1.59E-<br>05 | 0.00021626<br>9 |
| <b>Tenascin</b>                                                                      | 1.4<br>53 | 1.226 | 1.722 | 0.0866 | 1.59E-<br>05 | 0.00021626<br>9 |
| <b>UDP-glucuronic acid decarboxylase 1</b>                                           | 1.8<br>91 | 1.416 | 2.525 | 0.148  | 1.59E-<br>05 | 0.00021626<br>9 |
| <b>NSFL1 cofactor p47</b>                                                            | 1.2<br>91 | 1.15  | 1.451 | 0.0593 | 1.63E-<br>05 | 0.00022114<br>3 |
| <b>Bombesin receptor-activated protein C6orf89</b>                                   | 1.7<br>21 | 1.344 | 2.204 | 0.126  | 1.66E-<br>05 | 0.00022344<br>2 |
| <b>Adenylate kinase 4, mitochondrial</b>                                             | 0.4<br>09 | 0.272 | 0.614 | 0.208  | 1.68E-<br>05 | 0.00022604<br>2 |
| <b>Fatty acid-binding protein 9</b>                                                  | 0.5<br>47 | 0.415 | 0.72  | 0.141  | 1.73E-<br>05 | 0.00023255<br>2 |

|                                                                                    |       |       |       |        |          |             |
|------------------------------------------------------------------------------------|-------|-------|-------|--------|----------|-------------|
| <b>Hemojuvelin</b>                                                                 | 0.352 | 0.218 | 0.567 | 0.244  | 1.77E-05 | 0.000237026 |
| <b>Carbonic anhydrase-related protein 11</b>                                       | 1.534 | 1.261 | 1.865 | 0.0998 | 1.81E-05 | 0.000241275 |
| <b>E3 ubiquitin-protein ligase RNF43</b>                                           | 0.449 | 0.311 | 0.648 | 0.187  | 1.88E-05 | 0.000250694 |
| <b>CD5 antigen-like</b>                                                            | 1.418 | 1.208 | 1.664 | 0.0817 | 1.92E-05 | 0.000254769 |
| <b>Urokinase plasminogen activator surface receptor</b>                            | 1.86  | 1.399 | 2.473 | 0.145  | 1.92E-05 | 0.000254769 |
| <b>Probable E3 ubiquitin-protein ligase HERC4</b>                                  | 0.327 | 0.196 | 0.546 | 0.262  | 1.93E-05 | 0.000255045 |
| <b>Cathepsin O</b>                                                                 | 1.617 | 1.297 | 2.016 | 0.113  | 1.95E-05 | 0.000256202 |
| <b>Troponin I, cardiac muscle</b>                                                  | 1.308 | 1.156 | 1.479 | 0.0628 | 1.96E-05 | 0.000257991 |
| <b>Phosphate-regulating neutral endopeptidase</b>                                  | 1.598 | 1.288 | 1.982 | 0.11   | 2.00E-05 | 0.000262039 |
| <b>Retinoic acid receptor responder protein 2</b>                                  | 2.248 | 1.548 | 3.264 | 0.19   | 2.07E-05 | 0.000270886 |
| <b>NADH dehydrogenase [ubiquinone] 1 beta subcomplex subunit 11, mitochondrial</b> | 0.399 | 0.261 | 0.609 | 0.216  | 2.09E-05 | 0.000272192 |
| <b>Cathepsin F</b>                                                                 | 0.523 | 0.387 | 0.705 | 0.153  | 2.14E-05 | 0.000278287 |
| <b>Dual specificity protein kinase CLK2</b>                                        | 0.611 | 0.486 | 0.767 | 0.116  | 2.17E-05 | 0.000280793 |
| <b>Inhibin beta B chain</b>                                                        | 1.532 | 1.258 | 1.865 | 0.1    | 2.19E-05 | 0.000283153 |
| <b>DnaJ homolog subfamily C member 4</b>                                           | 0.506 | 0.369 | 0.694 | 0.161  | 2.32E-05 | 0.000299896 |
| <b>Epididymal-specific lipocalin-10</b>                                            | 0.593 | 0.465 | 0.756 | 0.124  | 2.36E-05 | 0.000303463 |
| <b>C-C motif chemokine 1</b>                                                       | 0.612 | 0.487 | 0.768 | 0.116  | 2.40E-05 | 0.000307562 |
| <b>Complement C1q tumor necrosis factor-related protein 3</b>                      | 0.404 | 0.265 | 0.615 | 0.214  | 2.40E-05 | 0.000307562 |
| <b>Dual specificity mitogen-activated protein kinase kinase 2</b>                  | 1.537 | 1.259 | 1.876 | 0.102  | 2.46E-05 | 0.000313706 |
| <b>Solute carrier family 35 member G2</b>                                          | 0.637 | 0.516 | 0.785 | 0.107  | 2.48E-05 | 0.000315964 |
| <b>Galactosylceramide sulfotransferase</b>                                         | 0.639 | 0.519 | 0.787 | 0.106  | 2.55E-05 | 0.000324188 |
| <b>Protein NDRG4</b>                                                               | 0.443 | 0.304 | 0.648 | 0.193  | 2.58E-05 | 0.00032558  |
| <b>Voltage-dependent calcium channel subunit alpha-2/delta-3</b>                   | 0.537 | 0.402 | 0.717 | 0.148  | 2.57E-05 | 0.00032558  |
| <b>Glycerol-3-phosphate dehydrogenase 1-like protein</b>                           | 0.609 | 0.484 | 0.768 | 0.118  | 2.59E-05 | 0.000326843 |
| <b>Interleukin-9</b>                                                               | 1.635 | 1.3   | 2.057 | 0.117  | 2.61E-05 | 0.000327474 |
| <b>Phospholipase A2, membrane associated</b>                                       | 1.457 | 1.223 | 1.737 | 0.0895 | 2.61E-05 | 0.000327474 |
| <b>Proteasome subunit beta type-5</b>                                              | 0.361 | 0.224 | 0.58  | 0.243  | 2.66E-05 | 0.00033246  |
| <b>DNA repair protein RAD51 homolog 1</b>                                          | 0.653 | 0.535 | 0.797 | 0.101  | 2.68E-05 | 0.000335044 |
| <b>Cystatin-M</b>                                                                  | 1.675 | 1.316 | 2.131 | 0.123  | 2.77E-05 | 0.000343748 |
| <b>C-type mannose receptor 2</b>                                                   | 2.042 | 1.463 | 2.851 | 0.17   | 2.77E-05 | 0.000343748 |
| <b>Cysteine-rich motor neuron 1 protein</b>                                        | 1.828 | 1.377 | 2.426 | 0.144  | 2.98E-05 | 0.000369522 |
| <b>C-C motif chemokine 3-like 1</b>                                                | 0.46  | 0.319 | 0.662 | 0.186  | 3.01E-05 | 0.00037247  |
| <b>Adenylyltransferase and sulfurtransferase MOCS3</b>                             | 0.479 | 0.339 | 0.677 | 0.176  | 3.04E-05 | 0.000374568 |
| <b>Netrin-G1</b>                                                                   | 1.501 | 1.24  | 1.817 | 0.0974 | 3.05E-05 | 0.000375341 |

|                                                                        |       |       |       |        |          |             |
|------------------------------------------------------------------------|-------|-------|-------|--------|----------|-------------|
| <b>TOMM20-like protein 1</b>                                           | 0.544 | 0.408 | 0.725 | 0.147  | 3.29E-05 | 0.000403688 |
| <b>Electron transfer flavoprotein subunit alpha, mitochondrial</b>     | 0.443 | 0.301 | 0.65  | 0.196  | 3.31E-05 | 0.000404802 |
| <b>Macrophage-capping protein</b>                                      | 1.436 | 1.21  | 1.703 | 0.0871 | 3.32E-05 | 0.000405759 |
| <b>Thioredoxin domain-containing protein 5</b>                         | 1.611 | 1.286 | 2.019 | 0.115  | 3.43E-05 | 0.000417743 |
| <b>Afamin</b>                                                          | 0.511 | 0.372 | 0.702 | 0.162  | 3.50E-05 | 0.000424542 |
| <b>Ribosomal protein S6 kinase beta-1</b>                              | 0.528 | 0.39  | 0.715 | 0.154  | 3.50E-05 | 0.000424542 |
| <b>Syntaxin-7</b>                                                      | 1.303 | 1.149 | 1.477 | 0.064  | 3.56E-05 | 0.00043029  |
| <b>Stress-70 protein, mitochondrial</b>                                | 1.284 | 1.141 | 1.446 | 0.0605 | 3.58E-05 | 0.000431694 |
| <b>NADH dehydrogenase [ubiquinone] 1 beta subcomplex subunit 4</b>     | 0.683 | 0.57  | 0.819 | 0.0922 | 3.63E-05 | 0.000436203 |
| <b>Fumarylacetoacetase</b>                                             | 0.688 | 0.576 | 0.822 | 0.0906 | 3.69E-05 | 0.000442221 |
| <b>Formimidoyltransferase-cyclodeaminase</b>                           | 0.876 | 0.823 | 0.933 | 0.0321 | 3.83E-05 | 0.00045771  |
| <b>Carbonic anhydrase 6</b>                                            | 0.754 | 0.659 | 0.862 | 0.0687 | 3.83E-05 | 0.00045771  |
| <b>Alanine aminotransferase 1</b>                                      | 0.528 | 0.39  | 0.716 | 0.155  | 3.92E-05 | 0.000466905 |
| <b>Regulator of G-protein signaling 19</b>                             | 0.408 | 0.266 | 0.625 | 0.218  | 3.93E-05 | 0.000466905 |
| <b>Proto-oncogene tyrosine-protein kinase receptor Ret</b>             | 0.621 | 0.495 | 0.78  | 0.116  | 4.17E-05 | 0.000494721 |
| <b>Protein kinase C-binding protein NELL2</b>                          | 1.976 | 1.426 | 2.737 | 0.166  | 4.28E-05 | 0.000506387 |
| <b>Pre-mRNA-splicing factor ATP-dependent RNA helicase PRP16</b>       | 0.427 | 0.284 | 0.642 | 0.208  | 4.36E-05 | 0.00051402  |
| <b>RNA polymerase II elongation factor ELL</b>                         | 0.257 | 0.134 | 0.494 | 0.333  | 4.52E-05 | 0.000531784 |
| <b>Sorcin</b>                                                          | 1.367 | 1.176 | 1.589 | 0.0768 | 4.65E-05 | 0.000545705 |
| <b>Small conductance calcium-activated potassium channel protein 1</b> | 0.341 | 0.203 | 0.572 | 0.265  | 4.74E-05 | 0.000555256 |
| <b>ADP-sugar pyrophosphatase</b>                                       | 1.642 | 1.293 | 2.086 | 0.122  | 4.82E-05 | 0.000561477 |
| <b>Semaphorin-3G</b>                                                   | 0.476 | 0.333 | 0.681 | 0.182  | 4.81E-05 | 0.000561477 |
| <b>Tumor protein p53-inducible protein 11</b>                          | 0.817 | 0.741 | 0.901 | 0.0499 | 4.88E-05 | 0.000566296 |
| <b>E3 ubiquitin-protein ligase NEURL1</b>                              | 0.311 | 0.177 | 0.547 | 0.287  | 4.88E-05 | 0.000566296 |
| <b>Prolactin-releasing peptide</b>                                     | 0.408 | 0.264 | 0.63  | 0.222  | 5.16E-05 | 0.000597356 |
| <b>Proliferation-associated protein 2G4</b>                            | 1.291 | 1.141 | 1.461 | 0.0631 | 5.20E-05 | 0.000600004 |
| <b>Anterior gradient protein 2 homolog</b>                             | 0.246 | 0.125 | 0.485 | 0.346  | 5.21E-05 | 0.000600004 |
| <b>Ephrin-A4</b>                                                       | 1.663 | 1.299 | 2.128 | 0.126  | 5.39E-05 | 0.000619085 |
| <b>Bola-like protein 1</b>                                             | 1.428 | 1.201 | 1.698 | 0.0883 | 5.40E-05 | 0.000619085 |
| <b>Pigment epithelium-derived factor</b>                               | 3.4   | 1.876 | 6.162 | 0.303  | 5.48E-05 | 0.000627288 |
| <b>N-acyl ethanolamine-hydrolyzing acid amidase</b>                    | 0.73  | 0.627 | 0.851 | 0.078  | 5.52E-05 | 0.000630688 |
| <b>Cellular retinoic acid-binding protein 1</b>                        | 0.44  | 0.295 | 0.656 | 0.204  | 5.58E-05 | 0.000635581 |
| <b>Delta-like protein 1</b>                                            | 1.632 | 1.286 | 2.072 | 0.122  | 5.67E-05 | 0.000643499 |
| <b>Olfactory marker protein</b>                                        | 0.454 | 0.309 | 0.667 | 0.196  | 5.67E-05 | 0.000643499 |

|                                                                                 |           |       |       |        |              |                 |
|---------------------------------------------------------------------------------|-----------|-------|-------|--------|--------------|-----------------|
| <b>Netrin receptor UNC5B</b>                                                    | 1.7<br>21 | 1.321 | 2.242 | 0.135  | 5.77E-<br>05 | 0.00065270<br>5 |
| <b>Glutathione S-transferase P</b>                                              | 1.5<br>25 | 1.241 | 1.875 | 0.105  | 6.02E-<br>05 | 0.00067990<br>2 |
| <b>3'(2'),5'-bisphosphate nucleotidase 1</b>                                    | 1.2<br>8  | 1.134 | 1.444 | 0.0615 | 6.13E-<br>05 | 0.00069056<br>6 |
| <b>Coiled-coil domain-containing protein 80</b>                                 | 2.1<br>26 | 1.47  | 3.077 | 0.189  | 6.28E-<br>05 | 0.00070385<br>4 |
| <b>Galectin-8</b>                                                               | 1.4<br>94 | 1.228 | 1.819 | 0.1    | 6.28E-<br>05 | 0.00070385<br>4 |
| <b>Uroplakin-3b-like protein</b>                                                | 0.5<br>84 | 0.449 | 0.76  | 0.134  | 6.39E-<br>05 | 0.00071447<br>5 |
| <b>Carboxypeptidase D</b>                                                       | 0.3<br>04 | 0.17  | 0.545 | 0.298  | 6.47E-<br>05 | 0.00072253      |
| <b>Smoothelin</b>                                                               | 1.2<br>02 | 1.098 | 1.315 | 0.046  | 6.50E-<br>05 | 0.00072381<br>9 |
| <b>Calcium-binding and coiled-coil domain-containing protein 2</b>              | 2.0<br>97 | 1.458 | 3.017 | 0.185  | 6.52E-<br>05 | 0.00072422<br>4 |
| <b>Beta-enolase</b>                                                             | 0.7<br>39 | 0.637 | 0.858 | 0.0761 | 7.09E-<br>05 | 0.00078529<br>7 |
| <b>Protein S100-A12</b>                                                         | 1.4       | 1.186 | 1.653 | 0.0847 | 7.10E-<br>05 | 0.00078529<br>7 |
| <b>Thioredoxin domain-containing protein 15</b>                                 | 1.5<br>11 | 1.232 | 1.852 | 0.104  | 7.22E-<br>05 | 0.00079748<br>2 |
| <b>Cytohesin-2</b>                                                              | 0.2<br>36 | 0.116 | 0.482 | 0.364  | 7.29E-<br>05 | 0.00080322<br>5 |
| <b>CD209 antigen</b>                                                            | 0.6<br>36 | 0.509 | 0.796 | 0.114  | 7.34E-<br>05 | 0.00080706      |
| <b>Cysteine and glycine-rich protein 3</b>                                      | 1.4<br>67 | 1.214 | 1.773 | 0.0967 | 7.43E-<br>05 | 0.00081536      |
| <b>Heparin cofactor 2</b>                                                       | 0.4<br>84 | 0.338 | 0.693 | 0.183  | 7.47E-<br>05 | 0.00081761<br>4 |
| <b>Retinol-binding protein 4</b>                                                | 0.5<br>3  | 0.387 | 0.726 | 0.161  | 7.57E-<br>05 | 0.00082648<br>4 |
| <b>Leucine-rich repeat and fibronectin type III domain-containing protein 1</b> | 0.4<br>13 | 0.266 | 0.641 | 0.224  | 7.95E-<br>05 | 0.00086593<br>1 |
| <b>Cell growth regulator with EF hand domain protein 1</b>                      | 1.8<br>17 | 1.351 | 2.445 | 0.151  | 7.99E-<br>05 | 0.00086857<br>5 |
| <b>Tenascin</b>                                                                 | 1.6<br>07 | 1.269 | 2.035 | 0.12   | 8.15E-<br>05 | 0.00088455<br>5 |
| <b>Roundabout homolog 2</b>                                                     | 2.3<br>85 | 1.547 | 3.675 | 0.221  | 8.22E-<br>05 | 0.00088919<br>7 |
| <b>Vesicular integral-membrane protein VIP36</b>                                | 0.6<br>11 | 0.478 | 0.781 | 0.125  | 8.35E-<br>05 | 0.00090234<br>9 |
| <b>Fatty acid-binding protein, liver</b>                                        | 0.5<br>97 | 0.462 | 0.772 | 0.131  | 8.40E-<br>05 | 0.00090523<br>2 |
| <b>Interleukin-23</b>                                                           | 1.4<br>58 | 1.208 | 1.76  | 0.0961 | 8.77E-<br>05 | 0.00094318<br>4 |
| <b>Endostatin</b>                                                               | 1.9<br>79 | 1.407 | 2.784 | 0.174  | 8.85E-<br>05 | 0.00094594      |
| <b>Interleukin-15 receptor subunit alpha</b>                                    | 1.5<br>97 | 1.264 | 2.018 | 0.119  | 8.84E-<br>05 | 0.00094594      |
| <b>Fc receptor-like protein 5</b>                                               | 1.3<br>79 | 1.174 | 1.619 | 0.0819 | 8.83E-<br>05 | 0.00094594      |
| <b>Vascular endothelial growth factor D</b>                                     | 1.3<br>78 | 1.173 | 1.617 | 0.0819 | 9.13E-<br>05 | 0.00097306<br>8 |
| <b>L-xylulose reductase</b>                                                     | 0.7<br>59 | 0.661 | 0.871 | 0.0706 | 9.19E-<br>05 | 0.00097736<br>7 |
| <b>Peptidyl-prolyl cis-trans isomerase-like 2</b>                               | 0.5<br>82 | 0.443 | 0.763 | 0.139  | 9.23E-<br>05 | 0.00097985<br>2 |
| <b>Small ubiquitin-related modifier 2</b>                                       | 1.4<br>3  | 1.195 | 1.711 | 0.0915 | 9.33E-<br>05 | 0.00098807<br>3 |
| <b>CCAAT/enhancer-binding protein beta</b>                                      | 0.6<br>42 | 0.514 | 0.802 | 0.113  | 9.42E-<br>05 | 0.00099624<br>3 |
| <b>Rab9 effector protein with kelch motifs</b>                                  | 0.4<br>02 | 0.254 | 0.636 | 0.234  | 9.71E-<br>05 | 0.00102382<br>7 |
| <b>Superoxide dismutase [Mn], mitochondrial</b>                                 | 0.5<br>2  | 0.374 | 0.723 | 0.168  | 9.78E-<br>05 | 0.00102778<br>1 |

|                                                                   |           |       |       |        |                 |                 |
|-------------------------------------------------------------------|-----------|-------|-------|--------|-----------------|-----------------|
| <b>Protein sel-1 homolog 2</b>                                    | 0.4<br>55 | 0.307 | 0.676 | 0.202  | 9.77E-<br>05    | 0.00102778<br>1 |
| <b>Hsc70-interacting protein</b>                                  | 1.5<br>33 | 1.236 | 1.9   | 0.11   | 9.91E-<br>05    | 0.00103846<br>8 |
| <b>Phosphatidate phosphatase PPAPDC1A</b>                         | 0.5<br>08 | 0.361 | 0.714 | 0.174  | 0.0001<br>01303 | 0.00105963<br>5 |
| <b>Ribonuclease 4</b>                                             | 2.4       | 1.543 | 3.734 | 0.225  | 0.0001<br>02107 | 0.00106087<br>4 |
| <b>Adenosine deaminase CECR1</b>                                  | 1.4<br>62 | 1.207 | 1.77  | 0.0977 | 0.0001<br>01758 | 0.00106087<br>4 |
| <b>RecQ-mediated genome instability protein 1</b>                 | 0.3<br>84 | 0.237 | 0.623 | 0.246  | 0.0001<br>02273 | 0.00106087<br>4 |
| <b>Protein phosphatase 1 regulatory subunit 3B</b>                | 0.7<br>41 | 0.637 | 0.862 | 0.0772 | 0.0001<br>02054 | 0.00106087<br>4 |
| <b>Interferon alpha-5</b>                                         | 0.4<br>12 | 0.263 | 0.644 | 0.229  | 0.0001<br>03446 | 0.00107080<br>7 |
| <b>Gamma-aminobutyric acid receptor-associated protein-like 1</b> | 1.6<br>25 | 1.272 | 2.076 | 0.125  | 0.0001<br>04164 | 0.00107377<br>4 |
| <b>C-X-C motif chemokine 13</b>                                   | 1.4<br>25 | 1.192 | 1.704 | 0.0913 | 0.0001<br>04075 | 0.00107377<br>4 |
| <b>PH and SEC7 domain-containing protein 2</b>                    | 0.7<br>09 | 0.596 | 0.844 | 0.0888 | 0.0001<br>05831 | 0.00108870<br>6 |
| <b>Elafin</b>                                                     | 1.4<br>16 | 1.187 | 1.688 | 0.0897 | 0.0001<br>06787 | 0.00109627<br>3 |
| <b>Collagen alpha-2(VI) chain</b>                                 | 1.5<br>39 | 1.237 | 1.915 | 0.111  | 0.0001<br>07609 | 0.00110244      |
| <b>RNA-binding protein 24</b>                                     | 0.5<br>36 | 0.39  | 0.735 | 0.161  | 0.0001<br>09024 | 0.00111464<br>6 |
| <b>Serine/threonine-protein kinase PAK 3</b>                      | 0.5<br>49 | 0.405 | 0.744 | 0.155  | 0.0001<br>09548 | 0.0011177       |
| <b>Acylphosphatase-2</b>                                          | 1.3<br>68 | 1.167 | 1.603 | 0.081  | 0.0001<br>09951 | 0.00111952<br>4 |
| <b>Serine/threonine-protein kinase 17B</b>                        | 0.5<br>34 | 0.389 | 0.734 | 0.162  | 0.0001<br>12706 | 0.00114522<br>8 |
| <b>Calcium/calmodulin-dependent protein kinase type 1D</b>        | 0.5<br>29 | 0.383 | 0.731 | 0.165  | 0.0001<br>14599 | 0.00116209<br>7 |
| <b>ProSAAS</b>                                                    | 1.4<br>13 | 1.185 | 1.684 | 0.0896 | 0.0001<br>15604 | 0.0011624       |
| <b>Protein S100-A11</b>                                           | 1.6<br>01 | 1.26  | 2.035 | 0.122  | 0.0001<br>15796 | 0.0011624       |
| <b>Eukaryotic translation initiation factor 4H</b>                | 1.1<br>5  | 1.071 | 1.234 | 0.0362 | 0.0001<br>15553 | 0.0011624       |
| <b>Limbic system-associated membrane protein</b>                  | 1.9<br>82 | 1.4   | 2.806 | 0.177  | 0.0001<br>15075 | 0.0011624       |
| <b>Hyaluronidase-1</b>                                            | 0.5<br>02 | 0.354 | 0.713 | 0.179  | 0.0001<br>15546 | 0.0011624       |
| <b>Killer cell immunoglobulin-like receptor 2DL1</b>              | 0.4<br>6  | 0.31  | 0.683 | 0.202  | 0.0001<br>16589 | 0.00116800<br>4 |
| <b>Serum amyloid A-2 protein</b>                                  | 1.2<br>15 | 1.1   | 1.342 | 0.0506 | 0.0001<br>17559 | 0.00117535<br>3 |
| <b>Prefoldin subunit 5</b>                                        | 1.6<br>39 | 1.274 | 2.107 | 0.128  | 0.0001<br>18454 | 0.00118193<br>1 |
| <b>Coagulation Factor V</b>                                       | 0.6<br>92 | 0.574 | 0.835 | 0.0956 | 0.0001<br>19334 | 0.00118832<br>8 |
| <b>ADP-ribosylation factor 1</b>                                  | 1.2<br>94 | 1.135 | 1.476 | 0.0671 | 0.0001<br>20941 | 0.00119715      |
| <b>G2/mitotic-specific cyclin-B2</b>                              | 0.4<br>41 | 0.29  | 0.669 | 0.213  | 0.0001<br>20534 | 0.00119715      |
| <b>Laminin-2</b>                                                  | 2.1<br>29 | 1.448 | 3.129 | 0.197  | 0.0001<br>2071  | 0.00119715      |
| <b>Peptidyl-prolyl cis-trans isomerase C</b>                      | 1.9<br>61 | 1.391 | 2.765 | 0.175  | 0.0001<br>2185  | 0.00120137<br>3 |
| <b>Membrane-associated progesterone receptor component 2</b>      | 1.3<br>51 | 1.159 | 1.574 | 0.0782 | 0.0001<br>2171  | 0.00120137<br>3 |
| <b>Endothelial monocyte-activating polypeptide 2</b>              | 0.4<br>65 | 0.314 | 0.687 | 0.2    | 0.0001<br>23824 | 0.00121841<br>8 |
| <b>Bone morphogenetic protein 3</b>                               | 0.5<br>01 | 0.352 | 0.713 | 0.18   | 0.0001<br>24079 | 0.00121851<br>5 |

|                                                                 |           |       |       |        |                 |                 |
|-----------------------------------------------------------------|-----------|-------|-------|--------|-----------------|-----------------|
| <b>Septin-6</b>                                                 | 1.4<br>87 | 1.214 | 1.821 | 0.104  | 0.0001<br>26497 | 0.00123981<br>7 |
| <b>Protein JTB</b>                                              | 1.8<br>13 | 1.337 | 2.458 | 0.155  | 0.0001<br>2725  | 0.00124474<br>8 |
| <b>Spondin-2</b>                                                | 1.5<br>34 | 1.232 | 1.911 | 0.112  | 0.0001<br>302   | 0.00127111<br>2 |
| <b>NAD-dependent protein deacylase sirtuin-5, mitochondrial</b> | 1.4<br>89 | 1.214 | 1.826 | 0.104  | 0.0001<br>30671 | 0.00127320<br>9 |
| <b>Ephrin type-B receptor 4</b>                                 | 1.7       | 1.295 | 2.231 | 0.139  | 0.0001<br>32067 | 0.00128430<br>1 |
| <b>mRNA-decapping enzyme 1B</b>                                 | 1.2<br>18 | 1.101 | 1.348 | 0.0517 | 0.0001<br>324   | 0.00128502<br>5 |
| <b>Neurogenic locus notch homolog protein 3</b>                 | 2.2<br>67 | 1.49  | 3.451 | 0.214  | 0.0001<br>33287 | 0.00129112<br>2 |
| <b>Collectin-10</b>                                             | 0.3<br>68 | 0.22  | 0.615 | 0.262  | 0.0001<br>344   | 0.00129937<br>6 |
| <b>Semenogelin-1</b>                                            | 1.8<br>57 | 1.351 | 2.552 | 0.162  | 0.0001<br>35576 | 0.00130820<br>8 |
| <b>Peptidyl-prolyl cis-trans isomerase G</b>                    | 0.6<br>66 | 0.541 | 0.821 | 0.106  | 0.0001<br>35921 | 0.00130899<br>5 |
| <b>Cofilin-2</b>                                                | 1.1<br>81 | 1.084 | 1.287 | 0.0437 | 0.0001<br>37551 | 0.00132213<br>2 |
| <b>Diablo homolog, mitochondrial</b>                            | 1.4<br>57 | 1.2   | 1.767 | 0.0987 | 0.0001<br>37863 | 0.00132257<br>7 |
| <b>Vascular endothelial growth factor receptor 2</b>            | 0.4<br>6  | 0.309 | 0.686 | 0.204  | 0.0001<br>38554 | 0.00132665<br>1 |
| <b>Receptor-type tyrosine-protein phosphatase delta</b>         | 0.6       | 0.461 | 0.78  | 0.134  | 0.0001<br>40019 | 0.00133811      |
| <b>Potassium voltage-gated channel subfamily G member 4</b>     | 0.4<br>45 | 0.293 | 0.676 | 0.213  | 0.0001<br>47547 | 0.00140465<br>4 |
| <b>Dynein intermediate chain 1, axonemal</b>                    | 0.5<br>18 | 0.368 | 0.727 | 0.173  | 0.0001<br>47498 | 0.00140465<br>4 |
| <b>Gamma-aminobutyric acid receptor-associated protein</b>      | 1.5<br>55 | 1.238 | 1.954 | 0.116  | 0.0001<br>49732 | 0.00142196<br>9 |
| <b>C-type lectin domain family 2 member A</b>                   | 1.6<br>63 | 1.279 | 2.164 | 0.134  | 0.0001<br>49936 | 0.00142196<br>9 |
| <b>Stromal interaction molecule 1</b>                           | 0.5<br>17 | 0.368 | 0.727 | 0.174  | 0.0001<br>50437 | 0.00142400<br>6 |
| <b>Rho guanine nucleotide exchange factor 7</b>                 | 0.4<br>98 | 0.348 | 0.714 | 0.184  | 0.0001<br>50958 | 0.00142622<br>5 |
| <b>Laminin subunit alpha-4</b>                                  | 0.4<br>25 | 0.273 | 0.662 | 0.226  | 0.0001<br>52248 | 0.00143568<br>4 |
| <b>Interferon alpha/beta receptor 1</b>                         | 1.5<br>26 | 1.226 | 1.9   | 0.112  | 0.0001<br>53421 | 0.00144401<br>5 |
| <b>Procollagen C-endopeptidase enhancer 2</b>                   | 0.5<br>47 | 0.4   | 0.748 | 0.159  | 0.0001<br>57205 | 0.00147683<br>9 |
| <b>Growth/differentiation factor 8</b>                          | 0.4<br>8  | 0.328 | 0.703 | 0.194  | 0.0001<br>58715 | 0.00148821<br>5 |
| <b>Beta-microseminoprotein</b>                                  | 1.2<br>65 | 1.12  | 1.429 | 0.0623 | 0.0001<br>60496 | 0.00150208<br>6 |
| <b>Glycolipid transfer protein domain-containing protein 2</b>  | 0.5<br>47 | 0.4   | 0.749 | 0.16   | 0.0001<br>61367 | 0.00150740<br>4 |
| <b>Leucine-rich repeat-containing protein 25</b>                | 0.5<br>49 | 0.402 | 0.75  | 0.159  | 0.0001<br>6173  | 0.00150796<br>4 |
| <b>Semaphorin-4B</b>                                            | 1.6<br>65 | 1.277 | 2.17  | 0.135  | 0.0001<br>63618 | 0.00152272      |
| <b>Kallikrein-12</b>                                            | 0.6<br>97 | 0.578 | 0.841 | 0.0957 | 0.0001<br>66576 | 0.00154735<br>6 |
| <b>Chromobox protein homolog 5</b>                              | 0.4<br>99 | 0.348 | 0.717 | 0.185  | 0.0001<br>68104 | 0.00155574<br>1 |
| <b>Serine/threonine-protein kinase 16</b>                       | 0.5<br>02 | 0.35  | 0.718 | 0.183  | 0.0001<br>67831 | 0.00155574<br>1 |
| <b>Sperm surface protein Sp17</b>                               | 1.5<br>31 | 1.226 | 1.911 | 0.113  | 0.0001<br>71077 | 0.00158031<br>7 |
| <b>Tumor necrosis factor receptor superfamily member 19L</b>    | 0.4<br>91 | 0.339 | 0.712 | 0.189  | 0.0001<br>72772 | 0.00159302<br>2 |
| <b>Rho guanine nucleotide exchange factor 10</b>                | 0.5<br>3  | 0.381 | 0.739 | 0.169  | 0.0001<br>79241 | 0.00164961<br>4 |

|                                                                          |           |       |       |        |                 |                 |
|--------------------------------------------------------------------------|-----------|-------|-------|--------|-----------------|-----------------|
| <b>Cytochrome c oxidase assembly factor 3 homolog, mitochondrial</b>     | 0.4<br>37 | 0.284 | 0.674 | 0.221  | 0.0001<br>80056 | 0.00165406      |
| <b>Carboxypeptidase M</b>                                                | 0.5<br>26 | 0.376 | 0.736 | 0.172  | 0.0001<br>81559 | 0.00166479<br>6 |
| <b>mRNA-decapping enzyme 1A</b>                                          | 1.6<br>06 | 1.253 | 2.058 | 0.127  | 0.0001<br>82351 | 0.00166898<br>3 |
| <b>Lymphotoxin alpha1:beta2</b>                                          | 1.6<br>01 | 1.251 | 2.048 | 0.126  | 0.0001<br>83345 | 0.00167500<br>2 |
| <b>1-phosphatidylinositol 4,5-bisphosphate phosphodiesterase gamma-1</b> | 0.4<br>19 | 0.266 | 0.661 | 0.232  | 0.0001<br>84371 | 0.00168128<br>6 |
| <b>Oncoprotein-induced transcript 3 protein</b>                          | 1.4<br>88 | 1.208 | 1.834 | 0.107  | 0.0001<br>88479 | 0.00171560<br>6 |
| <b>Chitinase-3-like protein 1</b>                                        | 1.1<br>65 | 1.075 | 1.263 | 0.041  | 0.0001<br>90548 | 0.00173127<br>1 |
| <b>Apolipoprotein A-V</b>                                                | 0.7<br>54 | 0.65  | 0.875 | 0.0758 | 0.0001<br>93502 | 0.00175490<br>8 |
| <b>DNA-directed RNA polymerases I and III subunit RPAC1</b>              | 0.6<br>2  | 0.482 | 0.797 | 0.128  | 0.0001<br>9546  | 0.00176944<br>7 |
| <b>Sialic acid-binding Ig-like lectin 8</b>                              | 0.4<br>28 | 0.274 | 0.669 | 0.228  | 0.0001<br>96885 | 0.00177911<br>2 |
| <b>Protocadherin beta-2</b>                                              | 0.5<br>11 | 0.359 | 0.728 | 0.18   | 0.0001<br>99505 | 0.00179951<br>9 |
| <b>C-type lectin domain family 4 member D</b>                            | 0.3<br>96 | 0.243 | 0.646 | 0.25   | 0.0002<br>06144 | 0.00185604<br>4 |
| <b>Trafficking protein particle complex subunit 3</b>                    | 1.5<br>63 | 1.234 | 1.978 | 0.12   | 0.0002<br>07141 | 0.00185829<br>5 |
| <b>RELT-like protein 2</b>                                               | 0.5<br>71 | 0.424 | 0.768 | 0.151  | 0.0002<br>06811 | 0.00185829<br>5 |
| <b>Cellular retinoic acid-binding protein 2</b>                          | 1.5<br>04 | 1.212 | 1.866 | 0.11   | 0.0002<br>09018 | 0.00187176<br>3 |
| <b>T-cell surface glycoprotein CD8 beta chain</b>                        | 0.5<br>54 | 0.406 | 0.757 | 0.159  | 0.0002<br>1066  | 0.00188308<br>3 |
| <b>Fermitin family homolog 3</b>                                         | 1.2<br>32 | 1.103 | 1.375 | 0.0563 | 0.0002<br>11527 | 0.00188612<br>9 |
| <b>Prostaglandin E synthase 3</b>                                        | 0.6<br>19 | 0.48  | 0.798 | 0.13   | 0.0002<br>11759 | 0.00188612<br>9 |
| <b>Transcription factor AP-1</b>                                         | 0.5<br>03 | 0.349 | 0.723 | 0.186  | 0.0002<br>14053 | 0.00190315<br>8 |
| <b>Golgi-associated plant pathogenesis-related protein 1</b>             | 0.6<br>34 | 0.498 | 0.807 | 0.123  | 0.0002<br>1742  | 0.00192965<br>5 |
| <b>Lumican</b>                                                           | 1.9<br>92 | 1.382 | 2.872 | 0.187  | 0.0002<br>18931 | 0.00193960<br>1 |
| <b>Opticin</b>                                                           | 0.4<br>5  | 0.295 | 0.688 | 0.216  | 0.0002<br>20537 | 0.00195036<br>3 |
| <b>Xyloside xylosyltransferase 1</b>                                     | 1.8<br>84 | 1.346 | 2.637 | 0.172  | 0.0002<br>21389 | 0.00195442<br>8 |
| <b>Syntaxin-8</b>                                                        | 1.2<br>79 | 1.122 | 1.457 | 0.0666 | 0.0002<br>2654  | 0.00199635<br>8 |
| <b>Properdin</b>                                                         | 0.4<br>91 | 0.337 | 0.717 | 0.193  | 0.0002<br>27685 | 0.00200290<br>7 |
| <b>Tumor necrosis factor receptor superfamily member 3</b>               | 0.6<br>69 | 0.54  | 0.829 | 0.109  | 0.0002<br>28835 | 0.00200946<br>7 |
| <b>ATP synthase subunit f, mitochondrial</b>                             | 0.5<br>11 | 0.357 | 0.73  | 0.182  | 0.0002<br>29907 | 0.00201533<br>1 |
| <b>Sulfotransferase family cytosolic 2B member 1</b>                     | 0.4<br>9  | 0.335 | 0.716 | 0.194  | 0.0002<br>3388  | 0.00204655<br>7 |
| <b>Sperm-associated antigen 11A</b>                                      | 0.5<br>41 | 0.389 | 0.75  | 0.167  | 0.0002<br>36193 | 0.00206317<br>1 |
| <b>Low-density lipoprotein receptor-related protein 10</b>               | 1.6<br>99 | 1.281 | 2.253 | 0.144  | 0.0002<br>36761 | 0.00206451<br>6 |
| <b>WNT1-inducible-signaling pathway protein 2</b>                        | 1.7<br>42 | 1.296 | 2.342 | 0.151  | 0.0002<br>37487 | 0.00206721<br>6 |
| <b>ATP synthase-coupling factor 6, mitochondrial</b>                     | 1.2<br>01 | 1.089 | 1.324 | 0.0499 | 0.0002<br>39887 | 0.00208118<br>6 |
| <b>Netrin-4</b>                                                          | 1.7<br>63 | 1.303 | 2.385 | 0.154  | 0.0002<br>39928 | 0.00208118<br>6 |
| <b>Tumor necrosis factor receptor superfamily member 1B</b>              | 1.5<br>36 | 1.221 | 1.932 | 0.117  | 0.0002<br>41082 | 0.00208213<br>7 |

|                                                                                 |           |       |       |        |                 |                 |
|---------------------------------------------------------------------------------|-----------|-------|-------|--------|-----------------|-----------------|
| <b>High affinity immunoglobulin epsilon receptor subunit alpha</b>              | 0.6<br>58 | 0.526 | 0.823 | 0.114  | 0.0002<br>41292 | 0.00208213<br>7 |
| <b>Cold shock domain-containing protein C2</b>                                  | 0.5<br>18 | 0.364 | 0.736 | 0.179  | 0.0002<br>40682 | 0.00208213<br>7 |
| <b>Receptor-type tyrosine-protein phosphatase eta</b>                           | 0.3<br>54 | 0.203 | 0.616 | 0.283  | 0.0002<br>42044 | 0.00208501<br>1 |
| <b>Aflatoxin B1 aldehyde reductase member 3</b>                                 | 0.8<br>13 | 0.728 | 0.908 | 0.0564 | 0.0002<br>44151 | 0.00209953<br>1 |
| <b>Twinfilin-1</b>                                                              | 1.2<br>79 | 1.121 | 1.459 | 0.0671 | 0.0002<br>45466 | 0.00210719<br>5 |
| <b>Protocadherin gamma-A1</b>                                                   | 1.1<br>76 | 1.078 | 1.282 | 0.0442 | 0.0002<br>48614 | 0.00212688<br>7 |
| <b>Cullin-4B</b>                                                                | 1.4<br>03 | 1.171 | 1.682 | 0.0924 | 0.0002<br>48525 | 0.00212688<br>7 |
| <b>Carboxypeptidase Q</b>                                                       | 0.6<br>64 | 0.533 | 0.827 | 0.112  | 0.0002<br>54311 | 0.00217189<br>5 |
| <b>SPARC-like protein 1</b>                                                     | 0.5<br>06 | 0.351 | 0.729 | 0.186  | 0.0002<br>55784 | 0.00218073<br>6 |
| <b>Ubiquitin-fold modifier-conjugating enzyme 1</b>                             | 1.2<br>87 | 1.124 | 1.473 | 0.0689 | 0.0002<br>56759 | 0.00218530<br>6 |
| <b>Brain-specific serine protease 4</b>                                         | 1.6<br>73 | 1.269 | 2.205 | 0.141  | 0.0002<br>59039 | 0.00220094<br>6 |
| <b>N-acetyllactosaminide beta-1,3-N-acetylglucosaminyltransferase 2</b>         | 0.3<br>96 | 0.24  | 0.651 | 0.254  | 0.0002<br>59693 | 0.00220274<br>7 |
| <b>Beta-defensin 128</b>                                                        | 0.4<br>38 | 0.282 | 0.683 | 0.226  | 0.0002<br>62345 | 0.00222145<br>8 |
| <b>Mast/stem cell growth factor receptor Kit</b>                                | 0.6<br>13 | 0.472 | 0.798 | 0.134  | 0.0002<br>63159 | 0.00222278<br>8 |
| <b>Activin A</b>                                                                | 1.4<br>4  | 1.184 | 1.752 | 0.1    | 0.0002<br>63395 | 0.00222278<br>8 |
| <b>Membrane-associated progesterone receptor component 2</b>                    | 0.5<br>33 | 0.38  | 0.748 | 0.173  | 0.0002<br>70684 | 0.00227341<br>4 |
| <b>Cadherin-related family member 5</b>                                         | 0.4<br>36 | 0.278 | 0.681 | 0.228  | 0.0002<br>70764 | 0.00227341<br>4 |
| <b>Intracellular hyaluronan-binding protein 4</b>                               | 1.5<br>04 | 1.206 | 1.865 | 0.111  | 0.0002<br>70223 | 0.00227341<br>4 |
| <b>Protein SET</b>                                                              | 0.4<br>14 | 0.257 | 0.666 | 0.243  | 0.0002<br>83788 | 0.00237475<br>6 |
| <b>Protein p13 MTCP-1</b>                                                       | 0.6<br>01 | 0.456 | 0.791 | 0.14   | 0.0002<br>83347 | 0.00237475<br>6 |
| <b>Tyrosine-protein kinase ZAP-70</b>                                           | 0.5<br>78 | 0.43  | 0.777 | 0.151  | 0.0002<br>85487 | 0.00238496<br>8 |
| <b>Procollagen-lysine,2-oxoglutarate 5-dioxygenase 2</b>                        | 1.3<br>94 | 1.165 | 1.668 | 0.0916 | 0.0002<br>86192 | 0.00238685<br>8 |
| <b>GSK3-beta interaction protein</b>                                            | 1.3<br>92 | 1.164 | 1.664 | 0.0912 | 0.0002<br>87489 | 0.00239365<br>8 |
| <b>Alpha-N-acetylglucosaminidase</b>                                            | 1.3<br>79 | 1.159 | 1.64  | 0.0886 | 0.0002<br>89055 | 0.00239867<br>9 |
| <b>Neurocan core protein</b>                                                    | 0.6<br>83 | 0.555 | 0.839 | 0.105  | 0.0002<br>89009 | 0.00239867<br>9 |
| <b>Phosphoglycerate mutase 1</b>                                                | 1.0<br>94 | 1.042 | 1.148 | 0.0247 | 0.0002<br>92826 | 0.00242592<br>5 |
| <b>Dolichyl-diphosphooligosaccharide--protein glycosyltransferase subunit 1</b> | 1.3<br>4  | 1.144 | 1.571 | 0.0809 | 0.0002<br>96664 | 0.00245363<br>4 |
| <b>Peptidyl-prolyl cis-trans isomerase FKBP7</b>                                | 1.3<br>73 | 1.156 | 1.63  | 0.0876 | 0.0002<br>98317 | 0.00246321<br>6 |
| <b>Glucoside xylosyltransferase 1</b>                                           | 0.5<br>66 | 0.416 | 0.771 | 0.157  | 0.0002<br>99796 | 0.00247132<br>9 |
| <b>Vascular endothelial growth factor A</b>                                     | 1.9<br>16 | 1.346 | 2.726 | 0.18   | 0.0003<br>05475 | 0.00251398<br>6 |
| <b>Syntaxin-4</b>                                                               | 1.2<br>21 | 1.095 | 1.36  | 0.0553 | 0.0003<br>1193  | 0.00256286<br>8 |
| <b>Neuronal growth regulator 1</b>                                              | 0.4<br>15 | 0.258 | 0.67  | 0.244  | 0.0003<br>16935 | 0.00259969<br>9 |
| <b>Cystatin-D</b>                                                               | 1.2<br>89 | 1.123 | 1.48  | 0.0706 | 0.0003<br>20418 | 0.00262184<br>1 |
| <b>Platelet-derived growth factor receptor alpha</b>                            | 1.3<br>31 | 1.139 | 1.556 | 0.0795 | 0.0003<br>20687 | 0.00262184<br>1 |

|                                                                                     |           |       |       |        |                 |                 |
|-------------------------------------------------------------------------------------|-----------|-------|-------|--------|-----------------|-----------------|
| <b>Tachykinin-4</b>                                                                 | 0.3<br>98 | 0.241 | 0.658 | 0.256  | 0.0003<br>29641 | 0.00269062<br>5 |
| <b>Coagulation factor VII</b>                                                       | 0.6<br>72 | 0.541 | 0.835 | 0.111  | 0.0003<br>3358  | 0.00271831<br>9 |
| <b>Protocadherin alpha-C2</b>                                                       | 1.4<br>54 | 1.185 | 1.785 | 0.105  | 0.0003<br>40437 | 0.00276966<br>9 |
| <b>Prosaposin</b>                                                                   | 1.5<br>91 | 1.234 | 2.052 | 0.13   | 0.0003<br>41226 | 0.00277155<br>5 |
| <b>Prolyl 3-hydroxylase 1</b>                                                       | 0.4<br>14 | 0.256 | 0.671 | 0.246  | 0.0003<br>44639 | 0.00279471<br>5 |
| <b>Vasodilator-stimulated phosphoprotein</b>                                        | 1.1<br>71 | 1.074 | 1.276 | 0.0441 | 0.0003<br>45589 | 0.00279787      |
| <b>Astrocytic phosphoprotein PEA-15</b>                                             | 1.3<br>84 | 1.158 | 1.655 | 0.091  | 0.0003<br>51214 | 0.00283879      |
| <b>Insulin-like growth factor-binding protein complex acid labile subunit</b>       | 0.7<br>15 | 0.595 | 0.86  | 0.094  | 0.0003<br>58545 | 0.00287935<br>1 |
| <b>Ephrin-A2</b>                                                                    | 1.6<br>85 | 1.265 | 2.244 | 0.146  | 0.0003<br>5843  | 0.00287935<br>1 |
| <b>Histone-lysine N-methyltransferase 2D</b>                                        | 0.3<br>95 | 0.238 | 0.658 | 0.26   | 0.0003<br>5705  | 0.00287935<br>1 |
| <b>Serpin A9</b>                                                                    | 1.5<br>39 | 1.215 | 1.95  | 0.121  | 0.0003<br>57646 | 0.00287935<br>1 |
| <b>Kallikrein-6</b>                                                                 | 0.6<br>54 | 0.518 | 0.826 | 0.119  | 0.0003<br>60689 | 0.00289189<br>7 |
| <b>NGFI-A-binding protein 1</b>                                                     | 0.6<br>79 | 0.548 | 0.84  | 0.109  | 0.0003<br>62441 | 0.00290127<br>5 |
| <b>Thyroglobulin</b>                                                                | 1.2<br>01 | 1.086 | 1.329 | 0.0515 | 0.0003<br>66043 | 0.00292541      |
| <b>Cell adhesion molecule 3</b>                                                     | 1.4<br>28 | 1.174 | 1.737 | 0.1    | 0.0003<br>70496 | 0.00295151<br>7 |
| <b>Interleukin-34</b>                                                               | 0.6<br>48 | 0.51  | 0.823 | 0.122  | 0.0003<br>70383 | 0.00295151<br>7 |
| <b>Aurora kinase B</b>                                                              | 0.5<br>12 | 0.354 | 0.74  | 0.188  | 0.0003<br>71365 | 0.00295371<br>6 |
| <b>cAMP-dependent protein kinase catalytic subunit alpha</b>                        | 1.1<br>54 | 1.066 | 1.249 | 0.0403 | 0.0003<br>74347 | 0.00297203<br>4 |
| <b>Augurin</b>                                                                      | 0.6<br>04 | 0.457 | 0.797 | 0.142  | 0.0003<br>74862 | 0.00297203<br>4 |
| <b>T-cell immunoreceptor with Ig and ITIM domains</b>                               | 0.6<br>47 | 0.509 | 0.823 | 0.122  | 0.0003<br>76718 | 0.00298199<br>8 |
| <b>Amyloid-like protein 1</b>                                                       | 0.7<br>24 | 0.606 | 0.865 | 0.0908 | 0.0003<br>79044 | 0.00299565<br>2 |
| <b>Gamma-enolase</b>                                                                | 1.3<br>1  | 1.129 | 1.521 | 0.0761 | 0.0003<br>8043  | 0.00300183<br>8 |
| <b>Thrombin</b>                                                                     | 0.6<br>89 | 0.561 | 0.847 | 0.105  | 0.0003<br>91745 | 0.00308136      |
| <b>Cyclic AMP-dependent transcription factor ATF-6 beta</b>                         | 0.5<br>99 | 0.452 | 0.795 | 0.144  | 0.0003<br>91576 | 0.00308136      |
| <b>Hepatocyte growth factor</b>                                                     | 1.3<br>53 | 1.144 | 1.599 | 0.0854 | 0.0003<br>99907 | 0.00314059<br>5 |
| <b>Ribonuclease P protein subunit p30</b>                                           | 0.5<br>06 | 0.347 | 0.738 | 0.193  | 0.0004<br>08397 | 0.00320221<br>6 |
| <b>Ribonuclease T2</b>                                                              | 1.6<br>27 | 1.242 | 2.132 | 0.138  | 0.0004<br>11017 | 0.00321769<br>3 |
| <b>Protein tyrosine phosphatase type IVA 2</b>                                      | 1.3<br>15 | 1.13  | 1.531 | 0.0775 | 0.0004<br>11734 | 0.00321824<br>5 |
| <b>Phosphatidylinositol 4-phosphate 3-kinase C2 domain-containing subunit alpha</b> | 0.4<br>78 | 0.317 | 0.72  | 0.209  | 0.0004<br>12968 | 0.00322283      |
| <b>Osteopetrosis-associated transmembrane protein 1</b>                             | 1.8<br>32 | 1.309 | 2.565 | 0.172  | 0.0004<br>16471 | 0.00324508<br>6 |
| <b>Dual specificity protein phosphatase 26</b>                                      | 0.6<br>57 | 0.52  | 0.83  | 0.119  | 0.0004<br>36073 | 0.00338721<br>6 |
| <b>Inositol polyphosphate 5-phosphatase OCRL-1</b>                                  | 0.5<br>4  | 0.383 | 0.761 | 0.175  | 0.0004<br>35539 | 0.00338721<br>6 |
| <b>Ephrin-B1</b>                                                                    | 1.5<br>7  | 1.221 | 2.019 | 0.128  | 0.0004<br>42761 | 0.00342847<br>1 |
| <b>Hepatocyte nuclear factor 4-alpha</b>                                            | 1.8<br>33 | 1.307 | 2.57  | 0.172  | 0.0004<br>42208 | 0.00342847<br>1 |

|                                                                                       |       |       |       |        |             |             |
|---------------------------------------------------------------------------------------|-------|-------|-------|--------|-------------|-------------|
| <b>WNT1-inducible-signaling pathway protein 1</b>                                     | 0.603 | 0.455 | 0.8   | 0.144  | 0.000444657 | 0.003437807 |
| <b>Vitamin D3 receptor</b>                                                            | 0.48  | 0.318 | 0.723 | 0.209  | 0.000445813 | 0.003441397 |
| <b>RUN and FYVE domain-containing protein 1</b>                                       | 0.526 | 0.368 | 0.753 | 0.183  | 0.000447562 | 0.003449553 |
| <b>Methyltransferase-like protein 24</b>                                              | 1.367 | 1.148 | 1.628 | 0.0891 | 0.000450749 | 0.003468749 |
| <b>Tuftelin-interacting protein 11</b>                                                | 0.624 | 0.48  | 0.812 | 0.134  | 0.000455871 | 0.003502753 |
| <b>Importin subunit alpha-1</b>                                                       | 1.45  | 1.178 | 1.784 | 0.106  | 0.000461251 | 0.003538624 |
| <b>COP9 signalosome complex subunit 7b</b>                                            | 0.832 | 0.75  | 0.922 | 0.0526 | 0.000466121 | 0.003570486 |
| <b>VIP36-like protein</b>                                                             | 1.213 | 1.089 | 1.351 | 0.0552 | 0.000469628 | 0.003591821 |
| <b>Phospholipid transfer protein</b>                                                  | 1.839 | 1.307 | 2.588 | 0.174  | 0.000471216 | 0.00359844  |
| <b>Arf-GAP with GTPase, ANK repeat and PH domain-containing protein 3</b>             | 0.643 | 0.501 | 0.824 | 0.127  | 0.00047862  | 0.003649384 |
| <b>Phosphoserine aminotransferase</b>                                                 | 0.794 | 0.697 | 0.904 | 0.0663 | 0.000488062 | 0.003715692 |
| <b>Protein-tyrosine sulfotransferase 2</b>                                            | 0.431 | 0.268 | 0.692 | 0.242  | 0.000491335 | 0.003734896 |
| <b>beta-nerve growth factor</b>                                                       | 1.264 | 1.108 | 1.443 | 0.0673 | 0.000493566 | 0.003746138 |
| <b>Urea transporter 2</b>                                                             | 1.499 | 1.193 | 1.883 | 0.116  | 0.000513804 | 0.003893807 |
| <b>Sorting nexin-17</b>                                                               | 0.624 | 0.478 | 0.815 | 0.136  | 0.000529853 | 0.00400933  |
| <b>Neuroendocrine convertase 2</b>                                                    | 1.45  | 1.175 | 1.79  | 0.107  | 0.000532242 | 0.004021292 |
| <b>Carnitine O-palmitoyltransferase 1, muscle isoform</b>                             | 0.53  | 0.37  | 0.759 | 0.184  | 0.000533401 | 0.004023946 |
| <b>Phosphoglycerate mutase 2</b>                                                      | 1.201 | 1.083 | 1.332 | 0.0529 | 0.000536431 | 0.004040681 |
| <b>Caveolin-3</b>                                                                     | 1.603 | 1.227 | 2.094 | 0.136  | 0.000540648 | 0.00406629  |
| <b>Apolipoprotein L1</b>                                                              | 0.587 | 0.434 | 0.794 | 0.154  | 0.00054791  | 0.004114695 |
| <b>Desmocollin-2</b>                                                                  | 1.672 | 1.249 | 2.238 | 0.149  | 0.000556981 | 0.00417652  |
| <b>Importin subunit beta-1</b>                                                        | 1.167 | 1.069 | 1.274 | 0.0448 | 0.000564109 | 0.004223605 |
| <b>Interleukin-6</b>                                                                  | 1.299 | 1.119 | 1.507 | 0.0758 | 0.000567452 | 0.004242254 |
| <b>Histone deacetylase 8</b>                                                          | 0.563 | 0.406 | 0.781 | 0.167  | 0.000577033 | 0.004307414 |
| <b>Tax1-binding protein 3</b>                                                         | 1.322 | 1.128 | 1.551 | 0.0812 | 0.000577905 | 0.004307471 |
| <b>Phosphatidylinositol 4,5-bisphosphate 3-kinase catalytic subunit gamma isoform</b> | 0.67  | 0.533 | 0.842 | 0.116  | 0.000579014 | 0.00430928  |
| <b>Protein S100-P</b>                                                                 | 1.528 | 1.2   | 1.947 | 0.123  | 0.000586354 | 0.004357396 |
| <b>Erythropoietin receptor</b>                                                        | 1.499 | 1.19  | 1.89  | 0.118  | 0.000597891 | 0.004436514 |
| <b>Pregnancy-specific beta-1-glycoprotein 8</b>                                       | 1.494 | 1.188 | 1.878 | 0.117  | 0.000600476 | 0.004449063 |
| <b>3-oxo-5-beta-steroid 4-dehydrogenase</b>                                           | 0.733 | 0.614 | 0.876 | 0.0905 | 0.000607934 | 0.004497625 |
| <b>Interferon alpha-2</b>                                                             | 0.349 | 0.191 | 0.637 | 0.307  | 0.000610204 | 0.004501046 |
| <b>Cyclin-dependent kinase 2-associated protein 1</b>                                 | 1.461 | 1.176 | 1.815 | 0.111  | 0.000609518 | 0.004501046 |
| <b>Gremlin-2</b>                                                                      | 1.576 | 1.215 | 2.045 | 0.133  | 0.000616888 | 0.004543615 |
| <b>Cystatin-S</b>                                                                     | 1.257 | 1.103 | 1.433 | 0.0668 | 0.00061835  | 0.004547658 |

|                                                                             |           |       |       |        |                 |                 |
|-----------------------------------------------------------------------------|-----------|-------|-------|--------|-----------------|-----------------|
| <b>Growth factor receptor-bound protein 2</b>                               | 1.1<br>45 | 1.059 | 1.237 | 0.0396 | 0.0006<br>25083 | 0.00459039<br>6 |
| <b>Signal transducer and activator of transcription 3</b>                   | 1.1<br>58 | 1.065 | 1.26  | 0.043  | 0.0006<br>32684 | 0.00463936<br>9 |
| <b>Integrin-linked protein kinase</b>                                       | 1.1<br>07 | 1.044 | 1.174 | 0.0298 | 0.0006<br>37631 | 0.00466877<br>2 |
| <b>Killer cell immunoglobulin-like receptor 2DL2</b>                        | 0.5<br>59 | 0.401 | 0.781 | 0.17   | 0.0006<br>40719 | 0.00468449<br>4 |
| <b>Microtubule-associated protein RP/EB family member 3</b>                 | 1.1<br>6  | 1.065 | 1.263 | 0.0435 | 0.0006<br>4957  | 0.00473531<br>6 |
| <b>Regulator of G-protein signaling 3</b>                                   | 0.5<br>33 | 0.371 | 0.765 | 0.185  | 0.0006<br>49572 | 0.00473531<br>6 |
| <b>Calcineurin B homologous protein 3</b>                                   | 1.3<br>69 | 1.143 | 1.641 | 0.0923 | 0.0006<br>59092 | 0.00479483<br>8 |
| <b>Basement membrane-specific heparan sulfate proteoglycan core protein</b> | 1.6<br>7  | 1.243 | 2.244 | 0.151  | 0.0006<br>59663 | 0.00479483<br>8 |
| <b>N-acetylserotonin O-methyltransferase-like protein</b>                   | 1.2<br>41 | 1.096 | 1.406 | 0.0635 | 0.0006<br>61517 | 0.00480129<br>9 |
| <b>Kininostatin</b>                                                         | 0.7<br>91 | 0.691 | 0.905 | 0.0689 | 0.0006<br>68731 | 0.00484659<br>3 |
| <b>Fibroblast growth factor-binding protein 3</b>                           | 1.5<br>01 | 1.188 | 1.897 | 0.119  | 0.0006<br>72148 | 0.00485721<br>9 |
| <b>NEDD8-conjugating enzyme Ubc12</b>                                       | 1.4<br>1  | 1.157 | 1.719 | 0.101  | 0.0006<br>71396 | 0.00485721<br>9 |
| <b>Probable ATP-dependent RNA helicase DDX23</b>                            | 0.4<br>3  | 0.264 | 0.7   | 0.248  | 0.0006<br>76744 | 0.00488334<br>5 |
| <b>Leucine-rich repeat and transmembrane domain-containing protein 1</b>    | 1.6<br>43 | 1.234 | 2.188 | 0.146  | 0.0006<br>78022 | 0.00488548<br>7 |
| <b>Guanine nucleotide-binding protein G(I)/G(S)/G(O) subunit gamma-11</b>   | 0.5<br>12 | 0.348 | 0.754 | 0.197  | 0.0006<br>83393 | 0.00490366<br>8 |
| <b>Stem cell growth factor-alpha</b>                                        | 1.4<br>28 | 1.163 | 1.754 | 0.105  | 0.0006<br>835   | 0.00490366<br>8 |
| <b>Iduronate 2-sulfatase</b>                                                | 1.4<br>69 | 1.177 | 1.834 | 0.113  | 0.0006<br>82951 | 0.00490366<br>8 |
| <b>Induced myeloid leukemia cell differentiation protein Mcl-1</b>          | 1.3<br>25 | 1.126 | 1.558 | 0.0828 | 0.0006<br>85392 | 0.00491016<br>8 |
| <b>Cell adhesion molecule 2</b>                                             | 1.4<br>88 | 1.183 | 1.872 | 0.117  | 0.0006<br>94181 | 0.00496599<br>1 |
| <b>Hepatoma-derived growth factor</b>                                       | 1.3<br>52 | 1.136 | 1.609 | 0.0889 | 0.0006<br>97721 | 0.00497700<br>7 |
| <b>High mobility group protein B1</b>                                       | 0.6<br>84 | 0.55  | 0.852 | 0.112  | 0.0006<br>96998 | 0.00497700<br>7 |
| <b>Neurogranin</b>                                                          | 1.1<br>84 | 1.074 | 1.306 | 0.0499 | 0.0007<br>0301  | 0.00500756<br>7 |
| <b>NAD kinase</b>                                                           | 1.3<br>05 | 1.119 | 1.523 | 0.0787 | 0.0007<br>06298 | 0.00501663<br>3 |
| <b>Thrombospondin-2</b>                                                     | 1.3<br>97 | 1.151 | 1.695 | 0.0987 | 0.0007<br>05891 | 0.00501663<br>3 |
| <b>3-ketodihydroshingosine reductase</b>                                    | 0.5<br>8  | 0.423 | 0.795 | 0.161  | 0.0007<br>13888 | 0.00506331<br>3 |
| <b>Stromal cell-derived factor 1</b>                                        | 1.5<br>95 | 1.217 | 2.09  | 0.138  | 0.0007<br>21115 | 0.0051073<br>6  |
| <b>Leucine-rich repeat transmembrane protein FLRT2</b>                      | 1.6<br>09 | 1.221 | 2.121 | 0.141  | 0.0007<br>24764 | 0.00512231<br>6 |
| <b>Sulfhydryl oxidase 2</b>                                                 | 0.6<br>21 | 0.471 | 0.818 | 0.141  | 0.0007<br>25292 | 0.00512231<br>6 |
| <b>Glutathione S-transferase A4</b>                                         | 0.5<br>66 | 0.407 | 0.788 | 0.169  | 0.0007<br>57327 | 0.00534097<br>8 |
| <b>Elongation factor 1-delta</b>                                            | 1.1<br>62 | 1.065 | 1.267 | 0.0445 | 0.0007<br>59981 | 0.00534455<br>6 |
| <b>Repulsive guidance molecule A</b>                                        | 0.4<br>53 | 0.285 | 0.718 | 0.235  | 0.0007<br>59654 | 0.00534455<br>6 |
| <b>Calcineurin subunit B type 1</b>                                         | 1.4<br>56 | 1.17  | 1.812 | 0.112  | 0.0007<br>67382 | 0.00538696<br>8 |
| <b>Dual specificity protein phosphatase 3</b>                               | 1.2<br>49 | 1.097 | 1.421 | 0.066  | 0.0007<br>68176 | 0.00538696<br>8 |
| <b>Programmed cell death protein 6</b>                                      | 0.5<br>34 | 0.371 | 0.77  | 0.186  | 0.0007<br>70725 | 0.00539724<br>4 |

|                                                                                     |           |       |       |        |                 |                 |
|-------------------------------------------------------------------------------------|-----------|-------|-------|--------|-----------------|-----------------|
| <b>Pleiotrophin</b>                                                                 | 1.4<br>94 | 1.182 | 1.887 | 0.119  | 0.0007<br>72358 | 0.00540108<br>4 |
| <b>Interleukin-20 receptor subunit alpha</b>                                        | 1.4<br>79 | 1.177 | 1.858 | 0.116  | 0.0007<br>75069 | 0.00541243<br>6 |
| <b>DNA-binding protein SATB2</b>                                                    | 0.4<br>93 | 0.326 | 0.745 | 0.211  | 0.0007<br>8243  | 0.00545619      |
| <b>Polymeric immunoglobulin receptor</b>                                            | 1.3<br>12 | 1.119 | 1.537 | 0.0809 | 0.0007<br>93551 | 0.00552599<br>9 |
| <b>CD9 antigen</b>                                                                  | 0.3<br>96 | 0.23  | 0.68  | 0.276  | 0.0007<br>97961 | 0.00554894<br>8 |
| <b>Galectin-related protein</b>                                                     | 1.1<br>21 | 1.049 | 1.198 | 0.0341 | 0.0007<br>99393 | 0.00555115<br>5 |
| <b>Membrane-associated guanylate kinase, WW and PDZ domain-containing protein 2</b> | 1.3<br>74 | 1.141 | 1.655 | 0.095  | 0.0008<br>13456 | 0.00564094<br>2 |
| <b>Thioredoxin-dependent peroxide reductase, mitochondrial</b>                      | 1.1<br>46 | 1.058 | 1.241 | 0.0407 | 0.0008<br>19992 | 0.00567835<br>7 |
| <b>72 kDa type IV collagenase</b>                                                   | 1.8<br>29 | 1.284 | 2.605 | 0.18   | 0.0008<br>21286 | 0.00567941<br>8 |
| <b>60 kDa heat shock protein, mitochondrial</b>                                     | 1.1<br>27 | 1.051 | 1.209 | 0.0359 | 0.0008<br>39902 | 0.00580010<br>3 |
| <b>von Willebrand factor A domain-containing protein 1</b>                          | 1.9<br>69 | 1.323 | 2.932 | 0.203  | 0.0008<br>45367 | 0.00582975<br>5 |
| <b>Beta-defensin 1</b>                                                              | 0.6<br>54 | 0.509 | 0.84  | 0.128  | 0.0008<br>69151 | 0.00598548<br>3 |
| <b>Pleckstrin homology domain-containing family A member 1</b>                      | 1.4<br>3  | 1.158 | 1.765 | 0.107  | 0.0008<br>72613 | 0.00600102<br>2 |
| <b>Melanoma-associated antigen B10</b>                                              | 0.5<br>7  | 0.409 | 0.794 | 0.169  | 0.0008<br>74471 | 0.00600550<br>7 |
| <b>Membrane-associated progesterone receptor component 1</b>                        | 1.3<br>51 | 1.132 | 1.613 | 0.0904 | 0.0008<br>76074 | 0.00600801<br>4 |
| <b>Regulator of G-protein signaling 5</b>                                           | 0.5<br>05 | 0.338 | 0.755 | 0.205  | 0.0008<br>7725  | 0.00600801<br>4 |
| <b>Protein O-linked-mannose beta-1,4-N-acetylglucosaminyltransferase 2</b>          | 1.3<br>12 | 1.118 | 1.54  | 0.0818 | 0.0008<br>90373 | 0.00608951<br>2 |
| <b>Ubiquitin carboxyl-terminal hydrolase 15</b>                                     | 1.3<br>34 | 1.125 | 1.582 | 0.087  | 0.0009<br>1361  | 0.00623986<br>9 |
| <b>Caspase-3</b>                                                                    | 1.1<br>24 | 1.049 | 1.205 | 0.0354 | 0.0009<br>45077 | 0.00644594<br>6 |
| <b>Interleukin enhancer-binding factor 3</b>                                        | 1.5<br>9  | 1.207 | 2.094 | 0.141  | 0.0009<br>64166 | 0.00656714<br>6 |
| <b>Tropomodulin-2</b>                                                               | 1.1<br>64 | 1.063 | 1.273 | 0.0459 | 0.0009<br>65926 | 0.00657014<br>7 |
| <b>Desmin</b>                                                                       | 0.6<br>5  | 0.503 | 0.84  | 0.131  | 0.0009<br>81103 | 0.00666427<br>4 |
| <b>Interleukin-5 receptor subunit alpha</b>                                         | 1.3<br>28 | 1.122 | 1.572 | 0.0861 | 0.0009<br>82866 | 0.00666715<br>3 |
| <b>26S proteasome non-ATPase regulatory subunit 10</b>                              | 0.4<br>17 | 0.248 | 0.702 | 0.266  | 0.0009<br>89719 | 0.00670450<br>3 |
| <b>T-cell surface glycoprotein CD8 alpha chain</b>                                  | 1.4<br>16 | 1.151 | 1.742 | 0.106  | 0.0010<br>00474 | 0.00676815      |
| <b>F-actin-capping protein subunit alpha-1</b>                                      | 1.1<br>84 | 1.071 | 1.309 | 0.0514 | 0.0010<br>03679 | 0.00678062<br>4 |
| <b>E3 ubiquitin-protein ligase LNX</b>                                              | 0.5<br>72 | 0.41  | 0.798 | 0.17   | 0.0010<br>20348 | 0.00688389<br>5 |
| <b>Folate receptor alpha</b>                                                        | 1.3<br>18 | 1.118 | 1.555 | 0.0843 | 0.0010<br>42974 | 0.00702702<br>1 |
| <b>PRKC apoptosis WT1 regulator protein</b>                                         | 1.1<br>48 | 1.057 | 1.247 | 0.0421 | 0.0010<br>51405 | 0.00707424<br>8 |
| <b>1-phosphatidylinositol 4,5-bisphosphate phosphodiesterase beta-1</b>             | 1.2<br>29 | 1.086 | 1.391 | 0.063  | 0.0010<br>55452 | 0.0070919       |
| <b>Interleukin-16</b>                                                               | 1.6<br>18 | 1.213 | 2.159 | 0.147  | 0.0010<br>58162 | 0.00710052<br>4 |
| <b>Lamina-associated polypeptide 2, isoforms beta/gamma</b>                         | 1.2<br>95 | 1.109 | 1.511 | 0.0789 | 0.0010<br>64767 | 0.00713523<br>1 |
| <b>Keratin, type I cytoskeletal 19</b>                                              | 0.6<br>36 | 0.485 | 0.834 | 0.138  | 0.0010<br>81115 | 0.00723504<br>4 |
| <b>CMRF35-like molecule 8</b>                                                       | 1.4<br>79 | 1.169 | 1.871 | 0.12   | 0.0010<br>95538 | 0.00732172<br>5 |

|                                                              |           |       |       |        |                 |                 |
|--------------------------------------------------------------|-----------|-------|-------|--------|-----------------|-----------------|
| <b>Tumor necrosis factor receptor superfamily member 1B</b>  | 1.4<br>06 | 1.146 | 1.726 | 0.104  | 0.0010<br>98985 | 0.00733491<br>3 |
| <b>Erythropoietin</b>                                        | 1.3<br>18 | 1.116 | 1.556 | 0.0847 | 0.0011<br>13117 | 0.00741929<br>1 |
| <b>Desmoglein-1</b>                                          | 0.6<br>16 | 0.46  | 0.825 | 0.149  | 0.0011<br>31024 | 0.00752856<br>6 |
| <b>Ribonuclease pancreatic</b>                               | 1.2<br>7  | 1.1   | 1.466 | 0.0734 | 0.0011<br>35017 | 0.00753499<br>7 |
| <b>Catenin beta-1</b>                                        | 0.6<br>57 | 0.51  | 0.846 | 0.129  | 0.0011<br>34331 | 0.00753499<br>7 |
| <b>Ck-beta-8-1</b>                                           | 1.4<br>58 | 1.162 | 1.83  | 0.116  | 0.0011<br>42028 | 0.00755740<br>4 |
| <b>Nuclease-sensitive element-binding protein 1</b>          | 1.3<br>17 | 1.116 | 1.554 | 0.0845 | 0.0011<br>40056 | 0.00755740<br>4 |
| <b>Progonadoliberin-2</b>                                    | 1.2<br>83 | 1.104 | 1.491 | 0.0766 | 0.0011<br>42945 | 0.00755740<br>4 |
| <b>Ras-related protein M-Ras</b>                             | 0.5<br>01 | 0.33  | 0.76  | 0.213  | 0.0011<br>51719 | 0.00760531<br>9 |
| <b>14-3-3 protein sigma</b>                                  | 1.4<br>39 | 1.155 | 1.792 | 0.112  | 0.0011<br>57485 | 0.00761772<br>7 |
| <b>Calcineurin subunit B type 2</b>                          | 0.6<br>2  | 0.465 | 0.827 | 0.147  | 0.0011<br>58188 | 0.00761772<br>7 |
| <b>Polypeptide N-acetylgalactosaminyltransferase 11</b>      | 0.3<br>94 | 0.225 | 0.691 | 0.286  | 0.0011<br>56382 | 0.00761772<br>7 |
| <b>Mitochondrial fission regulator 1</b>                     | 1.4<br>24 | 1.15  | 1.762 | 0.109  | 0.0011<br>6429  | 0.00764565<br>6 |
| <b>Protein FAM3B</b>                                         | 0.6<br>3  | 0.477 | 0.833 | 0.142  | 0.0011<br>65506 | 0.00764565<br>6 |
| <b>Cadherin-15</b>                                           | 0.5<br>48 | 0.381 | 0.788 | 0.185  | 0.0011<br>79802 | 0.00772075<br>4 |
| <b>Cathepsin B</b>                                           | 1.4<br>76 | 1.166 | 1.867 | 0.12   | 0.0011<br>81606 | 0.00772075<br>4 |
| <b>Paralemmin-1</b>                                          | 0.4<br>73 | 0.301 | 0.744 | 0.231  | 0.0011<br>81211 | 0.00772075<br>4 |
| <b>Vascular endothelial growth factor C</b>                  | 1.4<br>83 | 1.168 | 1.882 | 0.122  | 0.0012<br>09656 | 0.00788334<br>9 |
| <b>Syntenin-1</b>                                            | 1.4<br>9  | 1.17  | 1.897 | 0.123  | 0.0012<br>09112 | 0.00788334<br>9 |
| <b>SLAM family member 6</b>                                  | 1.5<br>16 | 1.178 | 1.951 | 0.129  | 0.0012<br>16298 | 0.00791626<br>8 |
| <b>Complement factor D</b>                                   | 1.8<br>89 | 1.284 | 2.779 | 0.197  | 0.0012<br>38712 | 0.00805162<br>8 |
| <b>Histidine-rich glycoprotein</b>                           | 0.7<br>08 | 0.573 | 0.873 | 0.107  | 0.0012<br>4739  | 0.00809746<br>2 |
| <b>Gelsolin</b>                                              | 0.5<br>85 | 0.423 | 0.81  | 0.166  | 0.0012<br>52618 | 0.00812081<br>7 |
| <b>B- and T-lymphocyte attenuator</b>                        | 0.5<br>65 | 0.4   | 0.799 | 0.177  | 0.0012<br>58115 | 0.00814584<br>6 |
| <b>Prefoldin subunit 3</b>                                   | 1.7<br>55 | 1.247 | 2.47  | 0.174  | 0.0012<br>62458 | 0.00816334<br>7 |
| <b>Vitamin D-binding protein</b>                             | 0.3<br>79 | 0.21  | 0.684 | 0.301  | 0.0012<br>73115 | 0.00821093<br>4 |
| <b>Growth/differentiation factor 2</b>                       | 0.5<br>28 | 0.358 | 0.779 | 0.198  | 0.0012<br>71899 | 0.00821093<br>4 |
| <b>Annexin A8</b>                                            | 0.5<br>14 | 0.343 | 0.771 | 0.206  | 0.0012<br>74958 | 0.00821218<br>1 |
| <b>tRNA (cytosine(38)-C(5))-methyltransferase</b>            | 1.5<br>18 | 1.178 | 1.958 | 0.13   | 0.0012<br>794   | 0.00823014<br>8 |
| <b>Tumor necrosis factor receptor superfamily member 11B</b> | 1.4<br>41 | 1.154 | 1.8   | 0.113  | 0.0012<br>82981 | 0.00823191<br>8 |
| <b>PR domain zinc finger protein 1</b>                       | 0.5<br>51 | 0.383 | 0.792 | 0.185  | 0.0012<br>8266  | 0.00823191<br>8 |
| <b>C-C motif chemokine 21</b>                                | 1.4<br>72 | 1.163 | 1.862 | 0.12   | 0.0012<br>88931 | 0.00825944<br>4 |
| <b>SUMO-conjugating enzyme UBC9</b>                          | 1.2<br>48 | 1.09  | 1.428 | 0.0689 | 0.0013<br>01285 | 0.00831719<br>8 |
| <b>Myelin protein zero-like protein 2</b>                    | 0.6<br>21 | 0.465 | 0.83  | 0.148  | 0.0013<br>00449 | 0.00831719<br>8 |

|                                                                       |           |       |       |        |                 |                 |
|-----------------------------------------------------------------------|-----------|-------|-------|--------|-----------------|-----------------|
| <b>Transgelin-3</b>                                                   | 1.3<br>7  | 1.131 | 1.66  | 0.0979 | 0.0013<br>1191  | 0.00836915<br>6 |
| <b>Transcription factor III B 90 kDa subunit</b>                      | 0.5<br>46 | 0.378 | 0.79  | 0.188  | 0.0013<br>12776 | 0.00836915<br>6 |
| <b>Ephrin type-A receptor 3</b>                                       | 1.3<br>25 | 1.116 | 1.574 | 0.0877 | 0.0013<br>25061 | 0.00843667<br>3 |
| <b>Cytokine-like protein 1</b>                                        | 1.3<br>21 | 1.115 | 1.566 | 0.0868 | 0.0013<br>28491 | 0.00843693<br>4 |
| <b>Lymphatic vessel endothelial hyaluronic acid receptor 1</b>        | 0.5<br>88 | 0.425 | 0.813 | 0.165  | 0.0013<br>27802 | 0.00843693<br>4 |
| <b>Alcohol dehydrogenase 1B</b>                                       | 0.6<br>35 | 0.481 | 0.838 | 0.141  | 0.0013<br>33123 | 0.00845556<br>4 |
| <b>T-cell surface glycoprotein CD3 epsilon chain</b>                  | 0.6<br>64 | 0.516 | 0.853 | 0.128  | 0.0013<br>38407 | 0.00847827<br>8 |
| <b>Nuclear protein MDM1</b>                                           | 1.5<br>31 | 1.18  | 1.986 | 0.133  | 0.0013<br>49615 | 0.00853841<br>4 |
| <b>Inter-alpha-trypsin inhibitor heavy chain H4</b>                   | 2.3<br>33 | 1.39  | 3.916 | 0.264  | 0.0013<br>52219 | 0.00854403<br>6 |
| <b>Alpha- and gamma-adaptin-binding protein p34</b>                   | 1.1<br>94 | 1.071 | 1.331 | 0.0554 | 0.0013<br>62867 | 0.00860040<br>1 |
| <b>Aurora kinase A</b>                                                | 0.5<br>47 | 0.378 | 0.791 | 0.188  | 0.0013<br>69223 | 0.00861876<br>6 |
| <b>Retinoic acid early transcript 1G protein</b>                      | 0.5<br>77 | 0.412 | 0.808 | 0.172  | 0.0013<br>69239 | 0.00861876<br>6 |
| <b>Fatty acid-binding protein, heart</b>                              | 1.4<br>13 | 1.143 | 1.747 | 0.108  | 0.0013<br>80407 | 0.00865763<br>6 |
| <b>Serine protease HTRA2, mitochondrial</b>                           | 1.2<br>95 | 1.105 | 1.517 | 0.0808 | 0.0013<br>80811 | 0.00865763<br>6 |
| <b>Brain natriuretic peptide 32</b>                                   | 1.5<br>18 | 1.175 | 1.96  | 0.13   | 0.0013<br>85788 | 0.00865763<br>6 |
| <b>Insulin-like growth factor 1 receptor</b>                          | 1.5<br>86 | 1.196 | 2.105 | 0.144  | 0.0013<br>79493 | 0.00865763<br>6 |
| <b>Golgi SNAP receptor complex member 1</b>                           | 0.4<br>62 | 0.288 | 0.741 | 0.242  | 0.0013<br>82656 | 0.00865763<br>6 |
| <b>Alkaline phosphatase, placental-like</b>                           | 1.4<br>39 | 1.151 | 1.799 | 0.114  | 0.0013<br>85847 | 0.00865763<br>6 |
| <b>Matrilin-3</b>                                                     | 1.4<br>71 | 1.161 | 1.863 | 0.121  | 0.0013<br>88904 | 0.00866585<br>8 |
| <b>Disintegrin and metalloproteinase domain-containing protein 10</b> | 0.3<br>72 | 0.203 | 0.682 | 0.309  | 0.0013<br>92309 | 0.00867623<br>1 |
| <b>Glutamate receptor 4</b>                                           | 1.3<br>34 | 1.118 | 1.592 | 0.0902 | 0.0013<br>97062 | 0.00869066<br>7 |
| <b>Probable ATP-dependent RNA helicase DHX58</b>                      | 1.4<br>11 | 1.142 | 1.743 | 0.108  | 0.0013<br>98117 | 0.00869066<br>7 |
| <b>Peroxiredoxin-1</b>                                                | 1.3<br>01 | 1.107 | 1.529 | 0.0824 | 0.0014<br>01403 | 0.00870023<br>4 |
| <b>Sex hormone-binding globulin</b>                                   | 1.2<br>78 | 1.099 | 1.485 | 0.0767 | 0.0014<br>07514 | 0.00871081<br>2 |
| <b>Protein NDNF</b>                                                   | 0.5<br>63 | 0.396 | 0.801 | 0.18   | 0.0014<br>06471 | 0.00871081<br>2 |
| <b>Gremlin-1</b>                                                      | 1.4<br>08 | 1.141 | 1.736 | 0.107  | 0.0014<br>08356 | 0.00871081<br>2 |
| <b>Ras-related protein Rab-14</b>                                     | 1.3<br>3  | 1.116 | 1.584 | 0.0893 | 0.0014<br>26951 | 0.00879305<br>6 |
| <b>Alpha-2,8-sialyltransferase 8F</b>                                 | 0.4<br>9  | 0.316 | 0.76  | 0.224  | 0.0014<br>26812 | 0.00879305<br>6 |
| <b>Axin-2</b>                                                         | 0.6<br>42 | 0.489 | 0.843 | 0.139  | 0.0014<br>24662 | 0.00879305<br>6 |
| <b>Non-histone chromosomal protein HMG-14</b>                         | 0.6<br>46 | 0.493 | 0.845 | 0.137  | 0.0014<br>30556 | 0.00880437<br>2 |
| <b>Proteasome subunit beta type-1</b>                                 | 1.4<br>55 | 1.155 | 1.832 | 0.118  | 0.0014<br>3476  | 0.00881934<br>3 |
| <b>Integral membrane protein 2A</b>                                   | 0.4<br>95 | 0.322 | 0.763 | 0.22   | 0.0014<br>43098 | 0.00885965<br>8 |
| <b>Cellular tumor antigen p53</b>                                     | 1.2<br>47 | 1.089 | 1.429 | 0.0694 | 0.0014<br>4738  | 0.00887500<br>9 |
| <b>Sarcalumenin</b>                                                   | 1.4<br>78 | 1.162 | 1.881 | 0.123  | 0.0014<br>56632 | 0.00891020<br>4 |

|                                                    |           |       |       |        |                 |                 |
|----------------------------------------------------|-----------|-------|-------|--------|-----------------|-----------------|
| Zymogen granule membrane protein 16                | 1.1<br>17 | 1.044 | 1.196 | 0.0348 | 0.0014<br>56699 | 0.00891020<br>4 |
| Ecto-ADP-ribosyltransferase 3                      | 0.6<br>45 | 0.492 | 0.845 | 0.138  | 0.0014<br>63387 | 0.00894012<br>8 |
| Actin-related protein 2/3 complex subunit 1B       | 1.1<br>21 | 1.045 | 1.203 | 0.0359 | 0.0014<br>90653 | 0.00909553<br>9 |
| Alpha-amylase 2B                                   | 0.7<br>4  | 0.615 | 0.891 | 0.0946 | 0.0014<br>97912 | 0.00912864<br>3 |
| 40S ribosomal protein S10                          | 0.7<br>32 | 0.603 | 0.887 | 0.0984 | 0.0015<br>05839 | 0.00916573<br>9 |
| Thioredoxin-related transmembrane protein 2        | 0.6<br>65 | 0.516 | 0.855 | 0.129  | 0.0015<br>12314 | 0.00919391<br>1 |
| Bcl-2-like protein 1                               | 0.6<br>83 | 0.539 | 0.864 | 0.12   | 0.0015<br>17385 | 0.00921349<br>3 |
| Paired immunoglobulin-like type 2 receptor alpha   | 1.4<br>15 | 1.142 | 1.754 | 0.11   | 0.0015<br>31343 | 0.00928691<br>4 |
| Neuroigin-1                                        | 1.6<br>42 | 1.208 | 2.233 | 0.157  | 0.0015<br>45198 | 0.00934816<br>3 |
| ADAMTS-like protein 2                              | 1.4<br>24 | 1.144 | 1.773 | 0.112  | 0.0015<br>43398 | 0.00934816<br>3 |
| Scavenger receptor class F member 1                | 1.4<br>06 | 1.139 | 1.737 | 0.108  | 0.0015<br>49638 | 0.00936365<br>1 |
| Adenylosuccinate synthetase isozyme 2              | 1.2<br>96 | 1.104 | 1.523 | 0.0821 | 0.0015<br>64674 | 0.00944304<br>5 |
| Transferrin receptor protein 1                     | 1.4<br>82 | 1.161 | 1.892 | 0.124  | 0.0015<br>77306 | 0.00950775<br>6 |
| Phenylalanine--tRNA ligase, mitochondrial          | 0.4<br>41 | 0.265 | 0.733 | 0.259  | 0.0015<br>92725 | 0.00958908<br>9 |
| Normal mucosa of esophagus-specific gene 1 protein | 0.7<br>29 | 0.599 | 0.887 | 0.1    | 0.0016<br>08123 | 0.00967010<br>2 |
| Interleukin-36 gamma                               | 1.2<br>81 | 1.098 | 1.494 | 0.0785 | 0.0016<br>1037  | 0.00967193<br>5 |
| R-spondin-3                                        | 1.4<br>39 | 1.147 | 1.805 | 0.116  | 0.0016<br>41976 | 0.00984988<br>3 |
| Transcription factor TFIIIB component B'' homolog  | 0.5<br>22 | 0.348 | 0.782 | 0.207  | 0.0016<br>44238 | 0.00985157<br>6 |
| Protein Wnt-5a                                     | 1.3<br>65 | 1.124 | 1.657 | 0.0989 | 0.0016<br>56562 | 0.00991349<br>1 |
| Allograft inflammatory factor 1-like               | 1.6<br>23 | 1.2   | 2.194 | 0.154  | 0.0016<br>59331 | 0.00991814<br>3 |
| 5'(3')-deoxyribonucleotidase, cytosolic type       | 1.3<br>02 | 1.105 | 1.536 | 0.084  | 0.0016<br>72014 | 0.00998196<br>2 |
| Insulin-like growth factor-binding protein 4       | 1.9<br>47 | 1.285 | 2.95  | 0.212  | 0.0016<br>77205 | 0.00999086<br>2 |
| Histone deacetylase complex subunit SAP18          | 0.6<br>31 | 0.474 | 0.841 | 0.146  | 0.0016<br>77518 | 0.00999086<br>2 |
| Calcineurin B homologous protein 1                 | 1.3<br>46 | 1.118 | 1.62  | 0.0946 | 0.0016<br>89896 | 0.01005255<br>9 |
| Immunoglobulin A                                   | 1.3<br>22 | 1.11  | 1.574 | 0.089  | 0.0017<br>15953 | 0.01019537<br>9 |
| Urea transporter 1                                 | 0.4<br>52 | 0.275 | 0.742 | 0.254  | 0.0017<br>18001 | 0.01019538<br>4 |
| Glioma pathogenesis-related protein 1              | 1.4<br>7  | 1.155 | 1.871 | 0.123  | 0.0017<br>32276 | 0.01026786<br>1 |
| Transaldolase                                      | 1.4<br>38 | 1.145 | 1.805 | 0.116  | 0.0017<br>59    | 0.01041386<br>4 |
| Bone morphogenetic protein 8B                      | 0.5<br>11 | 0.335 | 0.778 | 0.215  | 0.0017<br>73404 | 0.01048667<br>4 |
| Carboxypeptidase A2                                | 0.6<br>23 | 0.463 | 0.839 | 0.151  | 0.0017<br>82785 | 0.01052964<br>2 |
| Beta-1,4-galactosyltransferase 1                   | 2.1<br>71 | 1.334 | 3.532 | 0.248  | 0.0018<br>00402 | 0.01060852<br>1 |
| Matrix metalloproteinase-20                        | 0.6<br>12 | 0.45  | 0.833 | 0.157  | 0.0017<br>98491 | 0.01060852<br>1 |
| Fibroblast growth factor 7                         | 1.3<br>67 | 1.123 | 1.664 | 0.1    | 0.0018<br>32551 | 0.01076889<br>4 |
| Interleukin-10 receptor subunit alpha              | 0.5<br>81 | 0.413 | 0.818 | 0.174  | 0.0018<br>34108 | 0.01076889<br>4 |

|                                                                                |           |       |       |        |                 |                 |
|--------------------------------------------------------------------------------|-----------|-------|-------|--------|-----------------|-----------------|
| <b>Ribokinase</b>                                                              | 0.5<br>07 | 0.331 | 0.777 | 0.218  | 0.0018<br>30302 | 0.01076889<br>4 |
| <b>Cytochrome P450 3A4</b>                                                     | 0.4<br>62 | 0.284 | 0.751 | 0.248  | 0.0018<br>38977 | 0.01078476<br>8 |
| <b>Pro-opiomelanocortin</b>                                                    | 1.3<br>68 | 1.123 | 1.666 | 0.101  | 0.0018<br>48124 | 0.01081293<br>4 |
| <b>Ras-related protein Rab-27B</b>                                             | 0.4<br>92 | 0.315 | 0.769 | 0.228  | 0.0018<br>46135 | 0.01081293<br>4 |
| <b>PCNA-associated factor</b>                                                  | 1.3<br>36 | 1.113 | 1.604 | 0.0932 | 0.0018<br>5847  | 0.01086070<br>5 |
| <b>Hepatitis A virus cellular receptor 2</b>                                   | 1.5<br>37 | 1.172 | 2.016 | 0.138  | 0.0018<br>77623 | 0.01095977<br>3 |
| <b>ADP-ribosylation factor 6</b>                                               | 0.4<br>61 | 0.283 | 0.752 | 0.249  | 0.0018<br>98731 | 0.01107<br>4    |
| <b>Angiogenin</b>                                                              | 1.5<br>75 | 1.182 | 2.099 | 0.146  | 0.0019<br>1207  | 0.01113473<br>2 |
| <b>t-SNARE domain-containing protein 1</b>                                     | 0.3<br>65 | 0.193 | 0.69  | 0.325  | 0.0019<br>16664 | 0.01114844<br>9 |
| <b>Uncharacterized protein KIAA1644</b>                                        | 1.2<br>9  | 1.098 | 1.514 | 0.082  | 0.0019<br>30183 | 0.01121398<br>4 |
| <b>Ecto-NOX disulfide-thiol exchanger 1</b>                                    | 0.7<br>11 | 0.572 | 0.882 | 0.11   | 0.0019<br>36875 | 0.01123974<br>4 |
| <b>Glycoprotein hormone alpha-2</b>                                            | 0.5<br>35 | 0.36  | 0.795 | 0.202  | 0.0019<br>51939 | 0.01131397<br>2 |
| <b>Carboxypeptidase N catalytic chain</b>                                      | 0.4<br>62 | 0.283 | 0.753 | 0.25   | 0.0019<br>63406 | 0.01136720<br>6 |
| <b>Calmegin</b>                                                                | 1.3<br>2  | 1.107 | 1.574 | 0.0897 | 0.0019<br>72792 | 0.01140828<br>5 |
| <b>Basal Cell Adhesion Molecule</b>                                            | 1.4<br>73 | 1.152 | 1.884 | 0.125  | 0.0019<br>93387 | 0.01151400<br>7 |
| <b>Serine/threonine-protein kinase DCLK1</b>                                   | 1.3<br>9  | 1.128 | 1.712 | 0.107  | 0.0020<br>0686  | 0.01156561<br>4 |
| <b>Gastrin-releasing peptide</b>                                               | 1.4<br>42 | 1.143 | 1.819 | 0.118  | 0.0020<br>06967 | 0.01156561<br>4 |
| <b>Calcium-activated potassium channel subunit beta-3</b>                      | 1.7<br>65 | 1.23  | 2.531 | 0.184  | 0.0020<br>30063 | 0.01168518<br>3 |
| <b>IQ domain-containing protein F3</b>                                         | 0.5<br>02 | 0.324 | 0.778 | 0.224  | 0.0020<br>33433 | 0.01169106<br>7 |
| <b>Peptidyl-prolyl cis-trans isomerase F, mitochondrial</b>                    | 1.0<br>98 | 1.035 | 1.166 | 0.0305 | 0.0020<br>4623  | 0.01175107<br>3 |
| <b>ICOS ligand</b>                                                             | 1.3<br>16 | 1.105 | 1.567 | 0.0891 | 0.0020<br>50067 | 0.01175954<br>3 |
| <b>Protocadherin gamma-A12</b>                                                 | 1.4<br>78 | 1.153 | 1.896 | 0.127  | 0.0020<br>60178 | 0.01180394<br>5 |
| <b>Fibroblast growth factor 18</b>                                             | 1.3<br>34 | 1.11  | 1.602 | 0.0935 | 0.0020<br>64441 | 0.01181477<br>3 |
| <b>Regulator of G-protein signaling 10</b>                                     | 1.1<br>33 | 1.046 | 1.226 | 0.0405 | 0.0020<br>83539 | 0.01191037<br>8 |
| <b>SLIT and NTRK-like protein 4</b>                                            | 1.5<br>67 | 1.177 | 2.086 | 0.146  | 0.0021<br>00318 | 0.01197537<br>3 |
| <b>PDZ and LIM domain protein 1</b>                                            | 1.1<br>17 | 1.041 | 1.199 | 0.036  | 0.0021<br>03753 | 0.01197537<br>3 |
| <b>Chitinase-3-like protein 2</b>                                              | 0.4<br>44 | 0.265 | 0.745 | 0.264  | 0.0021<br>04529 | 0.01197537<br>3 |
| <b>Serine protease HTRA1</b>                                                   | 1.6<br>86 | 1.209 | 2.353 | 0.17   | 0.0021<br>03626 | 0.01197537<br>3 |
| <b>Stem cell growth factor-beta</b>                                            | 1.4<br>46 | 1.143 | 1.83  | 0.12   | 0.0021<br>07151 | 0.01197660<br>2 |
| <b>V-type immunoglobulin domain-containing suppressor of T-cell activation</b> | 1.3<br>3  | 1.109 | 1.595 | 0.0927 | 0.0021<br>23912 | 0.01205810<br>5 |
| <b>Small VCP/p97-interacting protein</b>                                       | 0.5<br>35 | 0.359 | 0.798 | 0.203  | 0.0021<br>32483 | 0.01209297<br>7 |
| <b>Lysosomal Pro-X carboxypeptidase</b>                                        | 0.6<br>46 | 0.488 | 0.854 | 0.142  | 0.0021<br>38631 | 0.01210211<br>1 |
| <b>Netrin receptor UNC5C</b>                                                   | 1.6<br>38 | 1.195 | 2.245 | 0.161  | 0.0021<br>38955 | 0.01210211<br>1 |
| <b>Tyrosine-protein kinase CSK</b>                                             | 1.1<br>33 | 1.046 | 1.228 | 0.0408 | 0.0021<br>49935 | 0.01215042<br>5 |

|                                                             |           |       |       |        |                 |                 |
|-------------------------------------------------------------|-----------|-------|-------|--------|-----------------|-----------------|
| <b>Citrate synthase, mitochondrial</b>                      | 1.1<br>07 | 1.037 | 1.181 | 0.0331 | 0.0021<br>57981 | 0.01216827<br>7 |
| <b>ES1 protein homolog, mitochondrial</b>                   | 0.5<br>26 | 0.349 | 0.793 | 0.209  | 0.0021<br>56257 | 0.01216827<br>7 |
| <b>Thyroid peroxidase</b>                                   | 0.6<br>59 | 0.505 | 0.86  | 0.136  | 0.0021<br>69221 | 0.01221781<br>7 |
| <b>Fibroleukin</b>                                          | 0.5<br>58 | 0.384 | 0.81  | 0.191  | 0.0021<br>75301 | 0.01222487<br>1 |
| <b>Interleukin-10</b>                                       | 1.3<br>51 | 1.115 | 1.638 | 0.0982 | 0.0021<br>75384 | 0.01222487<br>1 |
| <b>Palmitoyl-protein thioesterase 1</b>                     | 1.3<br>95 | 1.128 | 1.727 | 0.109  | 0.0021<br>79512 | 0.01223426      |
| <b>Heparan-sulfate 6-O-sulfotransferase 3</b>               | 0.4<br>44 | 0.264 | 0.746 | 0.265  | 0.0021<br>8481  | 0.01225019<br>1 |
| <b>Legumain</b>                                             | 0.5<br>53 | 0.379 | 0.808 | 0.193  | 0.0021<br>96311 | 0.01230082<br>4 |
| <b>Heterogeneous nuclear ribonucleoprotein Q</b>            | 0.6<br>81 | 0.533 | 0.871 | 0.125  | 0.0022<br>14935 | 0.01239119<br>2 |
| <b>Metalloproteinase inhibitor 2</b>                        | 1.9<br>35 | 1.267 | 2.956 | 0.216  | 0.0022<br>67341 | 0.01265593<br>2 |
| <b>Retinoid-binding protein 7</b>                           | 0.5<br>82 | 0.411 | 0.824 | 0.177  | 0.0022<br>66632 | 0.01265593<br>2 |
| <b>Annexin A11</b>                                          | 1.1<br>37 | 1.047 | 1.235 | 0.0421 | 0.0022<br>71128 | 0.01266287<br>4 |
| <b>Leucine-rich repeat-containing protein 4C</b>            | 1.5<br>72 | 1.175 | 2.102 | 0.148  | 0.0022<br>90367 | 0.01275586<br>1 |
| <b>OCIA domain-containing protein 1</b>                     | 0.6<br>12 | 0.446 | 0.839 | 0.161  | 0.0022<br>94392 | 0.01276399<br>7 |
| <b>Coagulation factor IXab</b>                              | 0.7<br>02 | 0.559 | 0.881 | 0.116  | 0.0022<br>98696 | 0.01277366<br>7 |
| <b>Nidogen-1</b>                                            | 1.5<br>61 | 1.172 | 2.078 | 0.146  | 0.0023<br>06979 | 0.01280540<br>6 |
| <b>Coiled-coil domain-containing protein 50</b>             | 1.2<br>42 | 1.08  | 1.427 | 0.071  | 0.0023<br>16078 | 0.01280675<br>6 |
| <b>Ubiquitin-fold modifier 1</b>                            | 1.1<br>78 | 1.06  | 1.308 | 0.0537 | 0.0023<br>22655 | 0.01280675<br>6 |
| <b>ATPase WRNIP1</b>                                        | 0.3<br>83 | 0.206 | 0.71  | 0.315  | 0.0023<br>17622 | 0.01280675<br>6 |
| <b>Immunoglobulin superfamily member 3</b>                  | 1.4<br>46 | 1.14  | 1.832 | 0.121  | 0.0023<br>19542 | 0.01280675<br>6 |
| <b>Calsyntenin-2</b>                                        | 1.4<br>07 | 1.13  | 1.753 | 0.112  | 0.0023<br>14185 | 0.01280675<br>6 |
| <b>Seizure 6-like protein</b>                               | 0.5<br>56 | 0.382 | 0.811 | 0.192  | 0.0023<br>21445 | 0.01280675<br>6 |
| <b>Retinoic acid receptor responder protein 3</b>           | 1.3<br>02 | 1.099 | 1.544 | 0.0868 | 0.0023<br>30452 | 0.01283552<br>9 |
| <b>Coxsackievirus and adenovirus receptor</b>               | 0.6<br>48 | 0.491 | 0.857 | 0.142  | 0.0023<br>40996 | 0.01287935<br>7 |
| <b>Protein dpy-30 homolog</b>                               | 1.3<br>66 | 1.117 | 1.671 | 0.103  | 0.0023<br>828   | 0.01309488<br>1 |
| <b>Segment polarity protein dishevelled homolog DVL-2</b>   | 0.6<br>77 | 0.527 | 0.871 | 0.128  | 0.0024<br>22555 | 0.01329868<br>1 |
| <b>Inhibin beta C chain</b>                                 | 0.6<br>29 | 0.466 | 0.849 | 0.153  | 0.0024<br>40172 | 0.01338063<br>4 |
| <b>Golgi membrane protein 1</b>                             | 1.3<br>08 | 1.1   | 1.557 | 0.0887 | 0.0024<br>49203 | 0.01341538<br>2 |
| <b>Armadillo repeat-containing protein 5</b>                | 0.4<br>75 | 0.294 | 0.769 | 0.245  | 0.0024<br>52768 | 0.01342014<br>3 |
| <b>Neurotrimin</b>                                          | 1.4<br>85 | 1.15  | 1.919 | 0.131  | 0.0024<br>58886 | 0.01343885<br>3 |
| <b>Tumor necrosis factor receptor superfamily member 19</b> | 1.3<br>66 | 1.116 | 1.673 | 0.103  | 0.0024<br>86233 | 0.01349940<br>6 |
| <b>Macrophage scavenger receptor types I and II</b>         | 1.3<br>58 | 1.114 | 1.656 | 0.101  | 0.0024<br>80863 | 0.01349940<br>6 |
| <b>Argininosuccinate lyase</b>                              | 0.8<br>05 | 0.7   | 0.927 | 0.0715 | 0.0024<br>77953 | 0.01349940<br>6 |
| <b>Vacuolar protein-sorting-associated protein 25</b>       | 1.1<br>78 | 1.059 | 1.309 | 0.054  | 0.0024<br>79428 | 0.01349940<br>6 |

|                                                                     |           |       |       |        |                 |                 |
|---------------------------------------------------------------------|-----------|-------|-------|--------|-----------------|-----------------|
| <b>Magnesium transporter NIPA4</b>                                  | 0.6<br>18 | 0.452 | 0.844 | 0.159  | 0.0024<br>80005 | 0.01349940<br>6 |
| <b>Transmembrane protein 132C</b>                                   | 1.4<br>61 | 1.143 | 1.867 | 0.125  | 0.0024<br>8471  | 0.01349940<br>6 |
| <b>Sulfotransferase 1C2</b>                                         | 0.5<br>43 | 0.366 | 0.807 | 0.202  | 0.0024<br>91979 | 0.01351586<br>5 |
| <b>Interleukin-1 receptor-like 1</b>                                | 1.3<br>43 | 1.109 | 1.626 | 0.0975 | 0.0025<br>00399 | 0.01354677<br>3 |
| <b>C-C motif chemokine 14</b>                                       | 1.3<br>48 | 1.111 | 1.635 | 0.0987 | 0.0025<br>08487 | 0.01357562<br>9 |
| <b>Tumor necrosis factor-inducible gene 6 protein</b>               | 1.4<br>22 | 1.132 | 1.787 | 0.117  | 0.0025<br>13904 | 0.01357562<br>9 |
| <b>Stabilin-2</b>                                                   | 0.6<br>22 | 0.457 | 0.846 | 0.157  | 0.0025<br>11382 | 0.01357562<br>9 |
| <b>Ig Kappa chain V-I region HK102- like</b>                        | 1.4<br>51 | 1.139 | 1.849 | 0.124  | 0.0025<br>6347  | 0.01382829<br>7 |
| <b>C-type lectin domain family 2 member D</b>                       | 0.5<br>15 | 0.335 | 0.793 | 0.22   | 0.0025<br>88345 | 0.01393229<br>4 |
| <b>Hydroxymethylglutaryl-CoA synthase, cytoplasmic</b>              | 0.8<br>66 | 0.788 | 0.951 | 0.0478 | 0.0025<br>8767  | 0.01393229<br>4 |
| <b>Protein disulfide-isomerase TMX3</b>                             | 1.4<br>86 | 1.148 | 1.923 | 0.132  | 0.0026<br>06239 | 0.01399834<br>5 |
| <b>Nucleophosmin</b>                                                | 0.3<br>47 | 0.174 | 0.691 | 0.351  | 0.0026<br>05011 | 0.01399834<br>5 |
| <b>Calcium-regulated heat-stable protein 1</b>                      | 1.3<br>58 | 1.112 | 1.658 | 0.102  | 0.0026<br>37913 | 0.01412276<br>1 |
| <b>Sorting nexin-7</b>                                              | 0.6<br>57 | 0.5   | 0.864 | 0.14   | 0.0026<br>34516 | 0.01412276<br>1 |
| <b>Glypican-5</b>                                                   | 0.6<br>75 | 0.522 | 0.872 | 0.131  | 0.0026<br>36732 | 0.01412276<br>1 |
| <b>Inositol monophosphatase 3</b>                                   | 0.6<br>68 | 0.514 | 0.869 | 0.134  | 0.0026<br>57165 | 0.01421055<br>3 |
| <b>Microtubule-associated proteins 1A/1B light chain 3B</b>         | 1.2<br>22 | 1.072 | 1.392 | 0.0667 | 0.0026<br>6087  | 0.01421509<br>7 |
| <b>SH3 domain-binding glutamic acid-rich-like protein 3</b>         | 1.1<br>4  | 1.047 | 1.242 | 0.0437 | 0.0026<br>70815 | 0.01425293<br>4 |
| <b>Protein RIC-3</b>                                                | 0.4<br>22 | 0.24  | 0.741 | 0.288  | 0.0026<br>84813 | 0.01431229<br>4 |
| <b>Tenascin</b>                                                     | 1.3<br>2  | 1.101 | 1.582 | 0.0925 | 0.0026<br>93276 | 0.01434205<br>3 |
| <b>Alpha-1-antitrypsin</b>                                          | 1.5<br>39 | 1.161 | 2.04  | 0.144  | 0.0027<br>02738 | 0.01434640<br>9 |
| <b>Major prion protein</b>                                          | 0.5<br>4  | 0.362 | 0.808 | 0.205  | 0.0026<br>98413 | 0.01434640<br>9 |
| <b>Apolipoprotein C-III</b>                                         | 0.8<br>51 | 0.766 | 0.946 | 0.0538 | 0.0027<br>00634 | 0.01434640<br>9 |
| <b>Neutrophil cytosol factor 4</b>                                  | 0.7<br>22 | 0.584 | 0.893 | 0.109  | 0.0027<br>10932 | 0.01435928<br>9 |
| <b>E3 ubiquitin-protein ligase RNF146</b>                           | 0.4<br>25 | 0.243 | 0.743 | 0.286  | 0.0027<br>09967 | 0.01435928<br>9 |
| <b>Stromelysin-2</b>                                                | 1.3<br>6  | 1.112 | 1.663 | 0.103  | 0.0027<br>18283 | 0.01438292<br>4 |
| <b>Collagen type IV alpha-3-binding protein</b>                     | 1.1<br>99 | 1.065 | 1.351 | 0.0607 | 0.0027<br>42471 | 0.01449550<br>2 |
| <b>M-phase inducer phosphatase 2</b>                                | 0.5<br>06 | 0.324 | 0.79  | 0.227  | 0.0027<br>47496 | 0.01450666<br>1 |
| <b>Platelet-activating factor acetylhydrolase</b>                   | 1.4<br>66 | 1.141 | 1.883 | 0.128  | 0.0027<br>79028 | 0.01465760<br>7 |
| <b>Serine/threonine-protein kinase pim-1</b>                        | 0.5<br>19 | 0.338 | 0.798 | 0.219  | 0.0027<br>8544  | 0.01467588<br>1 |
| <b>Methionine aminopeptidase 1</b>                                  | 1.1<br>13 | 1.038 | 1.194 | 0.0359 | 0.0028<br>20322 | 0.01484395<br>9 |
| <b>Fibroblast growth factor receptor 3</b>                          | 0.5<br>73 | 0.397 | 0.827 | 0.187  | 0.0029<br>00129 | 0.01524787<br>8 |
| <b>Lymphokine-activated killer T-cell-originated protein kinase</b> | 0.4<br>95 | 0.312 | 0.787 | 0.236  | 0.0029<br>03986 | 0.01525205<br>4 |
| <b>Transcobalamin-1</b>                                             | 1.2<br>75 | 1.086 | 1.496 | 0.0817 | 0.0029<br>27301 | 0.01535830<br>4 |

|                                                                      |           |       |       |        |                 |                 |
|----------------------------------------------------------------------|-----------|-------|-------|--------|-----------------|-----------------|
| <b>Nucleosome assembly protein 1-like 2</b>                          | 0.5<br>81 | 0.406 | 0.831 | 0.183  | 0.0029<br>36258 | 0.01538908<br>4 |
| <b>Chordin-like protein 1</b>                                        | 1.5<br>78 | 1.168 | 2.131 | 0.153  | 0.0029<br>5285  | 0.01545976<br>9 |
| <b>Protocadherin gamma-A10</b>                                       | 1.2<br>91 | 1.091 | 1.529 | 0.086  | 0.0029<br>57308 | 0.01546684<br>5 |
| <b>Apolipoprotein D</b>                                              | 0.6<br>56 | 0.496 | 0.866 | 0.142  | 0.0029<br>87765 | 0.01560974      |
| <b>Tyrosine-protein kinase SYK</b>                                   | 1.1<br>14 | 1.037 | 1.197 | 0.0365 | 0.0030<br>21872 | 0.01577138<br>4 |
| <b>Ribosomal protein S6 kinase alpha-3</b>                           | 1.1<br>49 | 1.048 | 1.26  | 0.047  | 0.0030<br>31844 | 0.01580685<br>9 |
| <b>Regenerating islet-derived protein 3-alpha</b>                    | 1.2<br>61 | 1.082 | 1.47  | 0.0783 | 0.0030<br>38042 | 0.01582236<br>8 |
| <b>Estradiol 17-beta-dehydrogenase 8</b>                             | 0.7<br>29 | 0.592 | 0.899 | 0.107  | 0.0030<br>41174 | 0.01582236<br>8 |
| <b>Dual specificity protein phosphatase 15</b>                       | 1.2<br>38 | 1.075 | 1.426 | 0.0722 | 0.0030<br>51816 | 0.01586116<br>1 |
| <b>Alpha-hemoglobin-stabilizing protein</b>                          | 0.6<br>85 | 0.534 | 0.88  | 0.128  | 0.0030<br>77397 | 0.01597743<br>6 |
| <b>V-set and transmembrane domain-containing protein 4</b>           | 0.5<br>2  | 0.337 | 0.802 | 0.221  | 0.0030<br>85116 | 0.01600082<br>6 |
| <b>Vacuolar protein sorting-associated protein 26A</b>               | 1.1<br>86 | 1.059 | 1.329 | 0.0578 | 0.0031<br>36198 | 0.01624883<br>5 |
| <b>HLA class I histocompatibility antigen, alpha chain G</b>         | 1.6<br>61 | 1.186 | 2.327 | 0.172  | 0.0031<br>4254  | 0.01626476<br>7 |
| <b>AP-2 complex subunit alpha-2</b>                                  | 1.1<br>95 | 1.062 | 1.345 | 0.0604 | 0.0031<br>55272 | 0.01631370<br>8 |
| <b>Low-density lipoprotein receptor-related protein 11</b>           | 1.7<br>33 | 1.203 | 2.498 | 0.187  | 0.0031<br>80352 | 0.01639127<br>4 |
| <b>Histone acetyltransferase type B catalytic subunit</b>            | 0.6<br>72 | 0.516 | 0.875 | 0.135  | 0.0031<br>81727 | 0.01639127<br>4 |
| <b>GrpE protein homolog 1, mitochondrial</b>                         | 1.1<br>83 | 1.058 | 1.324 | 0.0571 | 0.0031<br>83443 | 0.01639127<br>4 |
| <b>Growth/differentiation factor 10</b>                              | 0.5<br>04 | 0.32  | 0.795 | 0.232  | 0.0031<br>81781 | 0.01639127<br>4 |
| <b>O-acetyl-ADP-ribose deacetylase MACROD1</b>                       | 0.5<br>86 | 0.411 | 0.836 | 0.181  | 0.0031<br>9945  | 0.01645667<br>8 |
| <b>Cathelicidin antimicrobial peptide</b>                            | 0.7<br>86 | 0.669 | 0.922 | 0.0819 | 0.0032<br>12261 | 0.01650405<br>8 |
| <b>Ubiquitin carboxyl-terminal hydrolase 21</b>                      | 0.6<br>15 | 0.445 | 0.85  | 0.165  | 0.0032<br>15292 | 0.01650405<br>8 |
| <b>Transcription factor RelB</b>                                     | 0.5<br>35 | 0.353 | 0.811 | 0.213  | 0.0032<br>32998 | 0.01657785<br>5 |
| <b>Tryptophan--tRNA ligase, cytoplasmic</b>                          | 1.4<br>93 | 1.143 | 1.949 | 0.136  | 0.0032<br>56041 | 0.01667883<br>7 |
| <b>Thioredoxin domain-containing protein 12</b>                      | 1.1<br>61 | 1.051 | 1.282 | 0.0507 | 0.0032<br>78439 | 0.01677630<br>6 |
| <b>Acidic leucine-rich nuclear phosphoprotein 32 family member A</b> | 0.5<br>42 | 0.36  | 0.815 | 0.208  | 0.0032<br>94586 | 0.01684162<br>8 |
| <b>Homeodomain-only protein</b>                                      | 0.6<br>54 | 0.493 | 0.868 | 0.145  | 0.0033<br>20098 | 0.01695463<br>2 |
| <b>Pancreatic alpha-amylase</b>                                      | 0.7<br>69 | 0.646 | 0.917 | 0.0893 | 0.0033<br>35128 | 0.01701393<br>8 |
| <b>Transmembrane protein 59-like</b>                                 | 1.6<br>18 | 1.173 | 2.233 | 0.164  | 0.0033<br>56376 | 0.01710480<br>8 |
| <b>Prothrombin</b>                                                   | 2.0<br>72 | 1.273 | 3.373 | 0.249  | 0.0033<br>75833 | 0.01718637<br>5 |
| <b>Proteasome subunit alpha type-2</b>                               | 0.6<br>58 | 0.497 | 0.87  | 0.143  | 0.0033<br>95656 | 0.01726963<br>2 |
| <b>Peroxisomal membrane protein PEX14</b>                            | 1.2<br>62 | 1.08  | 1.474 | 0.0794 | 0.0034<br>07864 | 0.01729638<br>8 |
| <b>Protein regulator of cytokinesis 1</b>                            | 0.5<br>6  | 0.379 | 0.825 | 0.198  | 0.0034<br>04988 | 0.01729638<br>8 |
| <b>Asporin</b>                                                       | 0.7<br>58 | 0.63  | 0.913 | 0.0946 | 0.0034<br>31973 | 0.01740101<br>1 |
| <b>Eukaryotic translation initiation factor 2 subunit 1</b>          | 1.1<br>66 | 1.052 | 1.292 | 0.0525 | 0.0034<br>42929 | 0.01743880<br>2 |

|                                                                      |           |       |       |        |                 |                 |
|----------------------------------------------------------------------|-----------|-------|-------|--------|-----------------|-----------------|
| <b>Torsin-1A-interacting protein 2</b>                               | 1.3<br>07 | 1.092 | 1.565 | 0.0917 | 0.0034<br>75207 | 0.01757109<br>7 |
| <b>Eukaryotic translation initiation factor 4E</b>                   | 1.2<br>24 | 1.069 | 1.402 | 0.0692 | 0.0034<br>76106 | 0.01757109<br>7 |
| <b>Serine protease inhibitor Kazal-type 4</b>                        | 0.5<br>65 | 0.385 | 0.829 | 0.196  | 0.0035<br>63714 | 0.01799567      |
| <b>Catalase</b>                                                      | 0.7<br>89 | 0.672 | 0.925 | 0.0815 | 0.0035<br>89173 | 0.01810586<br>9 |
| <b>Methyl-CpG-binding domain protein 1</b>                           | 0.7<br>44 | 0.61  | 0.908 | 0.101  | 0.0036<br>24272 | 0.01826442<br>5 |
| <b>Neutral ceramidase</b>                                            | 0.6<br>99 | 0.549 | 0.89  | 0.123  | 0.0036<br>42631 | 0.01833838      |
| <b>Aldose reductase</b>                                              | 1.3<br>1  | 1.092 | 1.573 | 0.0932 | 0.0037<br>28291 | 0.01870377<br>2 |
| <b>C-C motif chemokine 23</b>                                        | 1.4<br>95 | 1.139 | 1.962 | 0.139  | 0.0037<br>31778 | 0.01870377<br>2 |
| <b>Bone sialoprotein 2</b>                                           | 1.3<br>03 | 1.09  | 1.559 | 0.0913 | 0.0037<br>2795  | 0.01870377<br>2 |
| <b>Tomoregulin-1</b>                                                 | 1.5<br>69 | 1.157 | 2.128 | 0.155  | 0.0037<br>20462 | 0.01870377<br>2 |
| <b>Sialoadhesin</b>                                                  | 1.2<br>75 | 1.082 | 1.502 | 0.0837 | 0.0037<br>33993 | 0.01870377<br>2 |
| <b>Adseverin</b>                                                     | 1.3<br>61 | 1.105 | 1.676 | 0.106  | 0.0037<br>68049 | 0.01885539<br>3 |
| <b>Bicaudal D-related protein 1</b>                                  | 1.4<br>8  | 1.135 | 1.93  | 0.135  | 0.0037<br>85363 | 0.01892301<br>3 |
| <b>Switch-associated protein 70</b>                                  | 1.5<br>38 | 1.149 | 2.058 | 0.149  | 0.0038<br>10218 | 0.01902815<br>9 |
| <b>Soluble calcium-activated nucleotidase 1</b>                      | 1.2<br>67 | 1.079 | 1.487 | 0.0818 | 0.0038<br>4344  | 0.01915564<br>5 |
| <b>Advanced glycosylation end product-specific receptor, soluble</b> | 1.1<br>9  | 1.058 | 1.338 | 0.0601 | 0.0038<br>4308  | 0.01915564<br>5 |
| <b>Activin B</b>                                                     | 0.6<br>37 | 0.469 | 0.865 | 0.156  | 0.0039<br>12948 | 0.01946310<br>4 |
| <b>Collagen alpha-1(VI) chain</b>                                    | 1.1<br>98 | 1.06  | 1.355 | 0.0627 | 0.0039<br>11155 | 0.01946310<br>4 |
| <b>Proteasome subunit alpha type-5</b>                               | 0.7<br>29 | 0.588 | 0.904 | 0.109  | 0.0039<br>24643 | 0.01950179<br>4 |
| <b>Alpha-actinin-2</b>                                               | 1.1<br>7  | 1.052 | 1.302 | 0.0545 | 0.0039<br>52845 | 0.01954239<br>4 |
| <b>UDP-glucose 4-epimerase</b>                                       | 0.6<br>75 | 0.517 | 0.882 | 0.136  | 0.0039<br>43878 | 0.01954239<br>4 |
| <b>E3 ubiquitin-protein ligase ZNRF3</b>                             | 1.2<br>83 | 1.083 | 1.52  | 0.0865 | 0.0039<br>54587 | 0.01954239<br>4 |
| <b>Ectodysplasin-A, secreted form</b>                                | 0.5<br>87 | 0.408 | 0.843 | 0.185  | 0.0039<br>60288 | 0.01954239<br>4 |
| <b>Proto-oncogene tyrosine-protein kinase ROS</b>                    | 0.6<br>3  | 0.46  | 0.863 | 0.16   | 0.0039<br>52265 | 0.01954239<br>4 |
| <b>Transmembrane protein 132A</b>                                    | 0.7<br>22 | 0.579 | 0.901 | 0.113  | 0.0039<br>50097 | 0.01954239<br>4 |
| <b>Kit ligand</b>                                                    | 0.6<br>87 | 0.532 | 0.887 | 0.131  | 0.0039<br>58847 | 0.01954239<br>4 |
| <b>ER membrane protein complex subunit 4</b>                         | 0.6<br>02 | 0.426 | 0.85  | 0.177  | 0.0039<br>958   | 0.01969036<br>6 |
| <b>Tubulin-specific chaperone A</b>                                  | 1.3<br>33 | 1.096 | 1.622 | 0.0999 | 0.0039<br>98184 | 0.01969036<br>6 |
| <b>Ubiquitin-associated and SH3 domain-containing protein B</b>      | 1.0<br>8  | 1.025 | 1.138 | 0.0268 | 0.0040<br>19242 | 0.01976872<br>7 |
| <b>Alpha-1-antichymotrypsin complex</b>                              | 1.3<br>32 | 1.096 | 1.619 | 0.0997 | 0.0040<br>22037 | 0.01976872<br>7 |
| <b>Amiloride-sensitive amine oxidase [copper-containing]</b>         | 0.8<br>27 | 0.727 | 0.941 | 0.0659 | 0.0040<br>2648  | 0.01977104<br>8 |
| <b>Interleukin-3 receptor subunit alpha</b>                          | 1.3<br>68 | 1.105 | 1.694 | 0.109  | 0.0040<br>70529 | 0.01994799<br>6 |
| <b>Erlin-1</b>                                                       | 0.4<br>31 | 0.242 | 0.765 | 0.293  | 0.0040<br>68696 | 0.01994799<br>6 |
| <b>Glypican-4</b>                                                    | 1.3<br>19 | 1.092 | 1.594 | 0.0965 | 0.0040<br>76665 | 0.01995842<br>2 |

|                                                                              |           |       |       |        |                 |                 |
|------------------------------------------------------------------------------|-----------|-------|-------|--------|-----------------|-----------------|
| <b>Kin of IRRE-like protein 3</b>                                            | 1.7<br>01 | 1.184 | 2.444 | 0.185  | 0.0040<br>82132 | 0.01996555<br>4 |
| <b>DnaJ homolog subfamily B member 1</b>                                     | 1.1<br>57 | 1.047 | 1.278 | 0.0508 | 0.0041<br>04542 | 0.02005545<br>9 |
| <b>Sialic acid-binding Ig-like lectin 15</b>                                 | 0.4<br>71 | 0.281 | 0.788 | 0.263  | 0.0041<br>6077  | 0.02031026<br>7 |
| <b>Protein S100-A10</b>                                                      | 0.5<br>62 | 0.379 | 0.834 | 0.201  | 0.0041<br>86389 | 0.02041531      |
| <b>Heparan sulfate glucosamine 3-O-sulfotransferase 5</b>                    | 0.6<br>92 | 0.538 | 0.891 | 0.128  | 0.0041<br>93547 | 0.02043020<br>8 |
| <b>Serine/threonine-protein phosphatase 4 regulatory subunit 3A</b>          | 1.3<br>42 | 1.097 | 1.642 | 0.103  | 0.0042<br>24032 | 0.02055860<br>9 |
| <b>Kidney-associated antigen 1</b>                                           | 1.4<br>31 | 1.119 | 1.83  | 0.126  | 0.0043<br>16714 | 0.02098917<br>8 |
| <b>Delta and Notch-like epidermal growth factor-related receptor</b>         | 0.7<br>03 | 0.552 | 0.896 | 0.123  | 0.0043<br>23089 | 0.02099967      |
| <b>L-Selectin</b>                                                            | 0.5<br>85 | 0.405 | 0.846 | 0.188  | 0.0043<br>43494 | 0.02107822<br>1 |
| <b>Interferon lambda receptor 1</b>                                          | 1.4<br>4  | 1.12  | 1.849 | 0.128  | 0.0043<br>80084 | 0.02123508<br>9 |
| <b>Vesicle-associated membrane protein-associated protein A</b>              | 1.1<br>33 | 1.04  | 1.235 | 0.0439 | 0.0043<br>89014 | 0.02123702<br>6 |
| <b>Indian hedgehog protein</b>                                               | 0.6<br>97 | 0.543 | 0.893 | 0.127  | 0.0043<br>88426 | 0.02123702<br>6 |
| <b>Insulin-like 3</b>                                                        | 0.6<br>73 | 0.513 | 0.884 | 0.139  | 0.0043<br>97748 | 0.02125862<br>7 |
| <b>Tyrosine-protein kinase Lyn, isoform B</b>                                | 1.1<br>09 | 1.033 | 1.192 | 0.0365 | 0.0044<br>57787 | 0.02152795<br>5 |
| <b>Protein SGT1 homolog</b>                                                  | 1.1<br>76 | 1.052 | 1.315 | 0.057  | 0.0044<br>66899 | 0.02153019<br>4 |
| <b>Uncharacterized protein C17orf78</b>                                      | 0.6<br>66 | 0.503 | 0.881 | 0.143  | 0.0044<br>62604 | 0.02153019<br>4 |
| <b>Ubiquitin-like protein 4A</b>                                             | 1.1<br>75 | 1.051 | 1.313 | 0.0567 | 0.0045<br>20602 | 0.02176796<br>6 |
| <b>Ras GTPase-activating protein-binding protein 2</b>                       | 1.1<br>54 | 1.045 | 1.273 | 0.0503 | 0.0045<br>27171 | 0.02177853<br>5 |
| <b>Ectodysplasin-A, secreted form</b>                                        | 0.5<br>5  | 0.363 | 0.831 | 0.211  | 0.0045<br>78882 | 0.02200603<br>7 |
| <b>Grancalcin</b>                                                            | 1.2<br>38 | 1.068 | 1.435 | 0.0753 | 0.0045<br>92994 | 0.02205257      |
| <b>Torsin-1A-interacting protein 1</b>                                       | 1.2<br>17 | 1.062 | 1.395 | 0.0694 | 0.0046<br>10405 | 0.02211484<br>3 |
| <b>Glutaredoxin-like protein C5orf63</b>                                     | 0.5<br>47 | 0.36  | 0.83  | 0.213  | 0.0046<br>23299 | 0.02215534<br>8 |
| <b>C-C motif chemokine 22</b>                                                | 1.2<br>65 | 1.075 | 1.489 | 0.0831 | 0.0046<br>46347 | 0.02224438<br>6 |
| <b>Carbonic anhydrase 13</b>                                                 | 1.1<br>01 | 1.03  | 1.177 | 0.034  | 0.0046<br>7731  | 0.02237111      |
| <b>Thyroid hormone receptor alpha</b>                                        | 0.6<br>01 | 0.422 | 0.855 | 0.18   | 0.0046<br>85682 | 0.02238964<br>7 |
| <b>Eukaryotic translation initiation factor 4B</b>                           | 1.1<br>66 | 1.048 | 1.296 | 0.0542 | 0.0047<br>03059 | 0.02245113<br>4 |
| <b>Amyloid beta A4 precursor protein-binding family B member 1</b>           | 1.3<br>21 | 1.089 | 1.603 | 0.0986 | 0.0047<br>20638 | 0.02246954      |
| <b>Potassium voltage-gated channel subfamily E regulatory beta subunit 5</b> | 1.2<br>91 | 1.081 | 1.541 | 0.0904 | 0.0047<br>13069 | 0.02246954      |
| <b>Sclerostin</b>                                                            | 0.5<br>94 | 0.414 | 0.852 | 0.184  | 0.0047<br>202   | 0.02246954      |
| <b>Matrix-remodeling-associated protein 8</b>                                | 0.5<br>91 | 0.411 | 0.851 | 0.186  | 0.0047<br>24967 | 0.02246954      |
| <b>Ena/VASP-like protein</b>                                                 | 0.6<br>34 | 0.462 | 0.87  | 0.162  | 0.0047<br>45378 | 0.02254507<br>5 |
| <b>Aldo-keto reductase family 1 member C1</b>                                | 0.5<br>96 | 0.417 | 0.854 | 0.183  | 0.0047<br>51193 | 0.02255118<br>3 |
| <b>Phosphoglycerate kinase 1</b>                                             | 1.2<br>45 | 1.069 | 1.45  | 0.0777 | 0.0047<br>59943 | 0.02257119<br>5 |
| <b>Carnitine O-acetyltransferase</b>                                         | 1.1       | 1.03  | 1.176 | 0.0339 | 0.0048<br>06567 | 0.02277059<br>8 |

|                                                             |           |       |       |        |                 |                          |
|-------------------------------------------------------------|-----------|-------|-------|--------|-----------------|--------------------------|
| <b>SAYSVFN domain-containing protein 1</b>                  | 0.6<br>2  | 0.444 | 0.865 | 0.17   | 0.0048<br>4516  | 0.02293160<br>8          |
| <b>DNA-directed RNA polymerase III subunit RPC9</b>         | 0.5<br>88 | 0.406 | 0.851 | 0.189  | 0.0048<br>95798 | 0.02312823<br>2          |
| <b>WW domain-binding protein 2</b>                          | 1.2<br>62 | 1.073 | 1.484 | 0.0827 | 0.0048<br>95995 | 0.02312823<br>2          |
| <b>Ferritin, mitochondrial</b>                              | 1.3<br>3  | 1.09  | 1.623 | 0.101  | 0.0049<br>09653 | 0.02315968<br>4          |
| <b>GNDF family receptor alpha-2</b>                         | 0.5<br>66 | 0.38  | 0.841 | 0.203  | 0.0049<br>11955 | 0.02315968<br>4          |
| <b>Tapasin</b>                                              | 1.2<br>51 | 1.07  | 1.463 | 0.0797 | 0.0049<br>18999 | 0.02317095<br>3          |
| <b>Myosin regulatory light chain 12A</b>                    | 1.1<br>08 | 1.032 | 1.19  | 0.0365 | 0.0049<br>49987 | 0.02329488<br>2          |
| <b>Protocadherin beta-10</b>                                | 0.6<br>45 | 0.475 | 0.876 | 0.156  | 0.0049<br>9645  | 0.02346917<br>5          |
| <b>Receptor tyrosine-protein kinase erbB-4</b>              | 1.3<br>54 | 1.096 | 1.673 | 0.108  | 0.0049<br>95077 | 0.02346917<br>5          |
| <b>Diphosphoinositol polyphosphate phosphohydrolase 1</b>   | 1.2<br>61 | 1.072 | 1.483 | 0.0828 | 0.0050<br>76145 | 0.02380976<br>2          |
| <b>Acid sphingomyelinase-like phosphodiesterase 3a</b>      | 0.6<br>4  | 0.468 | 0.874 | 0.16   | 0.0050<br>78523 | 0.02380976<br>2          |
| <b>E3 ubiquitin-protein ligase RNF128</b>                   | 0.5<br>24 | 0.333 | 0.823 | 0.231  | 0.0050<br>84336 | 0.02381458<br>9          |
| <b>Eukaryotic translation initiation factor 4 gamma 2</b>   | 1.0<br>84 | 1.025 | 1.147 | 0.0288 | 0.0051<br>18825 | 0.02395359<br>9          |
| <b>Neuropilin-1</b>                                         | 1.6<br>86 | 1.169 | 2.431 | 0.187  | 0.0051<br>73693 | 0.02418762<br>1          |
| <b>DNA-binding protein SATB1</b>                            | 0.5<br>76 | 0.392 | 0.848 | 0.197  | 0.0051<br>88419 | 0.02423371<br>5          |
| <b>3-ketoacyl-CoA thiolase, peroxisomal</b>                 | 0.8<br>35 | 0.737 | 0.948 | 0.0643 | 0.0051<br>96997 | 0.02425102<br>7          |
| <b>BH3-interacting domain death agonist</b>                 | 1.2<br>52 | 1.069 | 1.466 | 0.0804 | 0.0052<br>27061 | 0.02434726<br>1          |
| <b>Thiamine-triphosphatase</b>                              | 0.6<br>9  | 0.532 | 0.895 | 0.133  | 0.0052<br>274   | 0.02434726<br>1          |
| <b>Netrin receptor UNC5A</b>                                | 1.2<br>47 | 1.068 | 1.456 | 0.079  | 0.0052<br>40426 | 0.02438512<br>5          |
| <b>Heparan sulfate glucosamine 3-O-sulfotransferase 1</b>   | 0.4<br>72 | 0.278 | 0.799 | 0.269  | 0.0052<br>45838 | 0.02438751<br>6          |
| <b>Beta-1,4-galactosyltransferase 6</b>                     | 0.6<br>51 | 0.481 | 0.88  | 0.154  | 0.0052<br>57816 | 0.02442039<br>8          |
| <b>Quinone oxidoreductase-like protein 1</b>                | 0.8<br>19 | 0.712 | 0.942 | 0.0715 | 0.0052<br>64919 | 0.02443059<br>6          |
| <b>Proto-oncogene tyrosine-protein kinase Src isoform 2</b> | 1.0<br>9  | 1.026 | 1.158 | 0.0309 | 0.0052<br>88331 | 0.02449907<br>0.02449907 |
| <b>Dickkopf-like protein 1</b>                              | 0.6<br>93 | 0.535 | 0.897 | 0.132  | 0.0052<br>89516 | 0.02449907<br>0.02449907 |
| <b>Stanniocalcin-1</b>                                      | 1.5<br>18 | 1.132 | 2.037 | 0.15   | 0.0053<br>05475 | 0.02455015<br>1          |
| <b>Quinone oxidoreductase</b>                               | 0.8<br>45 | 0.75  | 0.951 | 0.0606 | 0.0053<br>71611 | 0.02483310<br>1          |
| <b>Protein kinase C beta type (splice variant beta-II)</b>  | 1.1<br>01 | 1.029 | 1.178 | 0.0346 | 0.0054<br>62899 | 0.02523170<br>3          |
| <b>Retinoschisin</b>                                        | 0.5<br>53 | 0.364 | 0.84  | 0.213  | 0.0054<br>88346 | 0.02532574<br>3          |
| <b>VPS10 domain-containing receptor SorCS2</b>              | 0.8<br>55 | 0.765 | 0.955 | 0.0565 | 0.0055<br>18162 | 0.02543975<br>1          |
| <b>Cas scaffolding protein family member 4</b>              | 1.3<br>24 | 1.086 | 1.614 | 0.101  | 0.0055<br>56853 | 0.02559442<br>5          |
| <b>Myoneurin</b>                                            | 0.5<br>33 | 0.342 | 0.832 | 0.227  | 0.0055<br>62557 | 0.02559701<br>6          |
| <b>Nectin-3</b>                                             | 0.4<br>9  | 0.296 | 0.812 | 0.257  | 0.0055<br>92864 | 0.02571271<br>5          |
| <b>Attractin</b>                                            | 0.5<br>21 | 0.328 | 0.826 | 0.235  | 0.0055<br>99077 | 0.02571753<br>2          |
| <b>Adenylyl cyclase-associated protein 1</b>                | 1.0<br>94 | 1.027 | 1.166 | 0.0324 | 0.0056<br>3525  | 0.02583872<br>4          |

|                                                                               |           |       |       |        |                 |                 |
|-------------------------------------------------------------------------------|-----------|-------|-------|--------|-----------------|-----------------|
| Dual adapter for phosphotyrosine and 3-phosphotyrosine and 3-phosphoinositide | 1.0<br>89 | 1.025 | 1.157 | 0.0308 | 0.0056<br>35841 | 0.02583872<br>4 |
| Kallikrein-8                                                                  | 1.4<br>91 | 1.124 | 1.977 | 0.144  | 0.0056<br>45992 | 0.02586144<br>9 |
| Serine/arginine-rich splicing factor 6                                        | 1.4<br>23 | 1.108 | 1.827 | 0.128  | 0.0057<br>08673 | 0.02612452<br>7 |
| Rho-related GTP-binding protein RhoC                                          | 1.1<br>22 | 1.034 | 1.217 | 0.0416 | 0.0057<br>27343 | 0.02618589<br>6 |
| UDP-glucose 6-dehydrogenase                                                   | 0.8<br>75 | 0.796 | 0.962 | 0.0484 | 0.0057<br>33927 | 0.02619194<br>9 |
| Tubulin-folding cofactor B                                                    | 1.1<br>23 | 1.034 | 1.219 | 0.042  | 0.0057<br>99262 | 0.02646610<br>9 |
| E3 ubiquitin-protein ligase RNF34                                             | 0.5<br>98 | 0.415 | 0.862 | 0.187  | 0.0058<br>30589 | 0.02658470<br>9 |
| Secretogranin-3                                                               | 0.6<br>59 | 0.49  | 0.887 | 0.151  | 0.0058<br>83714 | 0.02680238<br>9 |
| Matrilin-2                                                                    | 1.8<br>43 | 1.192 | 2.848 | 0.222  | 0.0059<br>55217 | 0.02704612<br>5 |
| Beta-2-glycoprotein 1                                                         | 1.9<br>11 | 1.205 | 3.03  | 0.235  | 0.0059<br>47327 | 0.02704612<br>5 |
| NADPH--cytochrome P450 reductase                                              | 0.7<br>7  | 0.64  | 0.928 | 0.0949 | 0.0059<br>55984 | 0.02704612<br>5 |
| Dipeptidase 1                                                                 | 1.3<br>47 | 1.089 | 1.666 | 0.108  | 0.0059<br>58948 | 0.02704612<br>5 |
| Cysteine-rich protein 2                                                       | 1.3<br>67 | 1.094 | 1.708 | 0.114  | 0.0059<br>77267 | 0.02710456<br>5 |
| Tumor susceptibility gene 101 protein                                         | 1.1<br>21 | 1.033 | 1.216 | 0.0415 | 0.0060<br>46512 | 0.02739361<br>5 |
| Inactive peptidyl-prolyl cis-trans isomerase FKBP6                            | 0.6<br>96 | 0.538 | 0.902 | 0.132  | 0.0061<br>18981 | 0.02767157<br>5 |
| Secretory carrier-associated membrane protein 5                               | 0.5       | 0.305 | 0.821 | 0.253  | 0.0061<br>16424 | 0.02767157<br>5 |
| Enhancer of rudimentary homolog                                               | 1.2<br>34 | 1.062 | 1.434 | 0.0767 | 0.0061<br>2802  | 0.02768730<br>7 |
| Keratocan                                                                     | 1.4<br>64 | 1.115 | 1.922 | 0.139  | 0.0061<br>37469 | 0.02769085<br>5 |
| NKG2D ligand 2                                                                | 1.2<br>98 | 1.077 | 1.563 | 0.0951 | 0.0061<br>39929 | 0.02769085<br>5 |
| Low-density lipoprotein receptor-related protein 4                            | 1.3<br>09 | 1.08  | 1.586 | 0.0982 | 0.0061<br>50608 | 0.02771391<br>6 |
| Apolipoprotein E                                                              | 0.8<br>12 | 0.7   | 0.943 | 0.076  | 0.0061<br>60383 | 0.02773286<br>2 |
| Agouti-related protein                                                        | 1.3<br>98 | 1.1   | 1.777 | 0.122  | 0.0061<br>65956 | 0.02773287<br>8 |
| Vitamin K-dependent protein S                                                 | 0.6<br>41 | 0.466 | 0.881 | 0.163  | 0.0061<br>99139 | 0.02785696<br>3 |
| Serine protease inhibitor Kazal-type 7                                        | 1.3<br>87 | 1.097 | 1.754 | 0.12   | 0.0062<br>34894 | 0.02796715<br>1 |
| Aldehyde dehydrogenase family 1 member A3                                     | 0.8<br>45 | 0.749 | 0.953 | 0.0616 | 0.0062<br>34722 | 0.02796715<br>1 |
| Protein BTG2                                                                  | 0.5<br>97 | 0.412 | 0.864 | 0.189  | 0.0062<br>98533 | 0.02822717<br>8 |
| Pyrroline-5-carboxylate reductase 1, mitochondrial                            | 1.2<br>48 | 1.065 | 1.463 | 0.0812 | 0.0063<br>35705 | 0.02836823<br>4 |
| Neural cell adhesion molecule 1, 120 kDa isoform                              | 0.5<br>93 | 0.407 | 0.863 | 0.192  | 0.0063<br>87036 | 0.02857237<br>4 |
| DNA polymerase epsilon subunit 3                                              | 0.4<br>48 | 0.252 | 0.798 | 0.294  | 0.0063<br>99526 | 0.02860254<br>8 |
| Nuclear receptor ROR-gamma                                                    | 1.2<br>84 | 1.073 | 1.538 | 0.0918 | 0.0064<br>18906 | 0.02866343<br>8 |
| T-cell surface antigen CD2                                                    | 1.1<br>11 | 1.03  | 1.199 | 0.0387 | 0.0064<br>84144 | 0.02892881<br>2 |
| Small ubiquitin-related modifier 3                                            | 1.1<br>58 | 1.042 | 1.287 | 0.0539 | 0.0065<br>35657 | 0.02913253<br>8 |
| Growth/differentiation factor 3                                               | 0.5<br>69 | 0.379 | 0.854 | 0.208  | 0.0065<br>80425 | 0.02930584<br>8 |
| Interferon-induced protein with tetratricopeptide repeats 2                   | 0.6<br>92 | 0.53  | 0.902 | 0.136  | 0.0065<br>98211 | 0.02935879<br>7 |

|                                                                                                              |           |       |       |        |                 |                 |
|--------------------------------------------------------------------------------------------------------------|-----------|-------|-------|--------|-----------------|-----------------|
| <b>Alpha-N-acetylgalactosaminide alpha-2,6-sialyltransferase 6</b>                                           | 1.5<br>4  | 1.127 | 2.103 | 0.159  | 0.0066<br>50558 | 0.02955874<br>6 |
| <b>Nicotinate-nucleotide pyrophosphorylase [carboxylating]</b>                                               | 1.4<br>13 | 1.101 | 1.814 | 0.127  | 0.0066<br>55022 | 0.02955874<br>6 |
| <b>Interleukin-6 receptor subunit alpha</b>                                                                  | 0.6<br>62 | 0.491 | 0.892 | 0.152  | 0.0066<br>8293  | 0.02965624<br>5 |
| <b>SWI/SNF-related matrix-associated actin-dependent regulator of chromatin subfamily E member 1-related</b> | 1.3<br>46 | 1.086 | 1.668 | 0.11   | 0.0067<br>17959 | 0.02978514<br>5 |
| <b>Protein FAM19A2</b>                                                                                       | 0.6<br>79 | 0.513 | 0.898 | 0.143  | 0.0067<br>34291 | 0.02983099<br>4 |
| <b>Ras-related protein Rab-6B</b>                                                                            | 1.0<br>95 | 1.025 | 1.169 | 0.0335 | 0.0067<br>48254 | 0.02986627<br>2 |
| <b>Transmembrane protein 9</b>                                                                               | 1.2<br>67 | 1.067 | 1.503 | 0.0873 | 0.0067<br>90357 | 0.03002592<br>3 |
| <b>Teneurin-2</b>                                                                                            | 0.5<br>4  | 0.346 | 0.844 | 0.228  | 0.0068<br>23618 | 0.03014622<br>1 |
| <b>BMP-binding endothelial regulator protein</b>                                                             | 1.4<br>52 | 1.108 | 1.903 | 0.138  | 0.0068<br>35094 | 0.03017015<br>5 |
| <b>Serine/threonine-protein kinase 24</b>                                                                    | 1.1<br>02 | 1.027 | 1.183 | 0.036  | 0.0068<br>47198 | 0.03019680<br>9 |
| <b>Collagen alpha-1(X) chain</b>                                                                             | 1.2<br>11 | 1.054 | 1.391 | 0.0709 | 0.0069<br>25991 | 0.03051726<br>3 |
| <b>ETS-related transcription factor Elf-5</b>                                                                | 1.4<br>3  | 1.103 | 1.854 | 0.133  | 0.0069<br>33606 | 0.03052380<br>6 |
| <b>Solute carrier family 41 member 2</b>                                                                     | 0.6<br>86 | 0.521 | 0.902 | 0.14   | 0.0069<br>46386 | 0.03055305<br>3 |
| <b>Semaphorin-6C</b>                                                                                         | 0.6<br>46 | 0.47  | 0.887 | 0.162  | 0.0069<br>716   | 0.03063689      |
| <b>Protachykinin-1</b>                                                                                       | 1.3<br>39 | 1.083 | 1.655 | 0.108  | 0.0069<br>86972 | 0.03067736<br>8 |
| <b>Apolipoprotein C-I</b>                                                                                    | 2.0<br>71 | 1.22  | 3.514 | 0.27   | 0.0069<br>94275 | 0.03068237<br>4 |
| <b>Succinate-semialdehyde dehydrogenase, mitochondrial</b>                                                   | 0.7<br>98 | 0.677 | 0.94  | 0.0839 | 0.0070<br>27512 | 0.03080103<br>9 |
| <b>Ornithine decarboxylase antizyme 1</b>                                                                    | 1.2<br>42 | 1.061 | 1.454 | 0.0805 | 0.0070<br>47185 | 0.03086009<br>9 |
| <b>Serine protease inhibitor Kazal-type 2</b>                                                                | 1.2<br>55 | 1.064 | 1.481 | 0.0844 | 0.0070<br>55933 | 0.03087125<br>8 |
| <b>Ornithine carbamoyltransferase, mitochondrial</b>                                                         | 0.8<br>64 | 0.777 | 0.961 | 0.0541 | 0.0070<br>78471 | 0.03094267<br>7 |
| <b>Nucleoside diphosphate kinase B</b>                                                                       | 1.1<br>14 | 1.03  | 1.205 | 0.0401 | 0.0070<br>91072 | 0.03097056<br>8 |
| <b>Kelch-like protein 12</b>                                                                                 | 1.3<br>05 | 1.075 | 1.584 | 0.0988 | 0.0071<br>17936 | 0.03106065<br>3 |
| <b>C-C motif chemokine 4-like</b>                                                                            | 1.2<br>21 | 1.056 | 1.412 | 0.0741 | 0.0071<br>28659 | 0.03108020<br>3 |
| <b>Stromal cell-derived factor 1</b>                                                                         | 1.3<br>78 | 1.091 | 1.741 | 0.119  | 0.0071<br>59677 | 0.03118812<br>8 |
| <b>Coiled-coil domain-containing protein 167</b>                                                             | 0.6<br>4  | 0.462 | 0.886 | 0.166  | 0.0072<br>40127 | 0.03151100<br>9 |
| <b>Kynureninase</b>                                                                                          | 0.6<br>47 | 0.471 | 0.889 | 0.162  | 0.0072<br>92708 | 0.03168446<br>1 |
| <b>GDP-fucose protein O-fucosyltransferase 1</b>                                                             | 1.3<br>15 | 1.077 | 1.606 | 0.102  | 0.0072<br>88407 | 0.03168446<br>1 |
| <b>Macrophage receptor MARCO</b>                                                                             | 0.6       | 0.413 | 0.872 | 0.191  | 0.0073<br>37669 | 0.03185200<br>8 |
| <b>Prenylcysteine oxidase 1</b>                                                                              | 0.6<br>78 | 0.511 | 0.901 | 0.145  | 0.0073<br>54335 | 0.03186878<br>5 |
| <b>Insulin</b>                                                                                               | 1.1<br>51 | 1.039 | 1.276 | 0.0526 | 0.0073<br>49955 | 0.03186878<br>5 |
| <b>Beta-1,4-galactosyltransferase 2</b>                                                                      | 0.5<br>07 | 0.308 | 0.833 | 0.254  | 0.0073<br>6517  | 0.03188798<br>6 |
| <b>Serine palmitoyltransferase 2</b>                                                                         | 0.6<br>67 | 0.496 | 0.897 | 0.151  | 0.0073<br>92255 | 0.03197744<br>4 |
| <b>Myelin protein zero-like protein 1</b>                                                                    | 1.3<br>72 | 1.088 | 1.73  | 0.118  | 0.0074<br>34728 | 0.03213325<br>6 |
| <b>BPI fold-containing family B member 1</b>                                                                 | 1.2<br>5  | 1.062 | 1.472 | 0.0833 | 0.0074<br>44069 | 0.03214572<br>3 |

|                                                                |           |       |       |        |                 |                 |
|----------------------------------------------------------------|-----------|-------|-------|--------|-----------------|-----------------|
| <b>Peptidyl-prolyl cis-trans isomerase FKBP3</b>               | 1.1<br>38 | 1.035 | 1.251 | 0.0483 | 0.0074<br>73423 | 0.03224451<br>9 |
| <b>Fc receptor-like protein 1</b>                              | 1.2<br>78 | 1.068 | 1.531 | 0.0919 | 0.0075<br>61679 | 0.03259705<br>7 |
| <b>Pancreatic triacylglycerol lipase</b>                       | 0.8<br>45 | 0.747 | 0.956 | 0.0629 | 0.0075<br>74886 | 0.03262574<br>2 |
| <b>Down syndrome cell adhesion molecule-like protein 1</b>     | 1.3<br>92 | 1.092 | 1.775 | 0.124  | 0.0076<br>22942 | 0.03280434<br>8 |
| <b>Peroxisome assembly protein 26</b>                          | 0.6<br>38 | 0.459 | 0.888 | 0.168  | 0.0076<br>96998 | 0.03309443<br>3 |
| <b>Interleukin-12 subunit beta</b>                             | 1.2<br>95 | 1.071 | 1.567 | 0.0971 | 0.0077<br>19338 | 0.03316185<br>1 |
| <b>14-3-3 protein zeta/delta</b>                               | 1.1<br>29 | 1.032 | 1.234 | 0.0455 | 0.0077<br>62833 | 0.03331995<br>5 |
| <b>Chordin-like protein 2</b>                                  | 1.3<br>68 | 1.086 | 1.724 | 0.118  | 0.0077<br>99119 | 0.03344686<br>6 |
| <b>Vacuolar protein sorting-associated protein 4B</b>          | 0.6<br>89 | 0.523 | 0.907 | 0.14   | 0.0078<br>48732 | 0.03363066<br>8 |
| <b>Docking protein 2</b>                                       | 1.0<br>93 | 1.024 | 1.167 | 0.0335 | 0.0078<br>6696  | 0.03367979      |
| <b>SHC-transforming protein 1</b>                              | 1.1<br>67 | 1.041 | 1.308 | 0.0582 | 0.0078<br>95373 | 0.03377239      |
| <b>Metalloproteinase inhibitor 4</b>                           | 1.3<br>42 | 1.08  | 1.667 | 0.111  | 0.0079<br>40624 | 0.03393679<br>4 |
| <b>DnaJ homolog subfamily B member 11</b>                      | 1.2<br>67 | 1.064 | 1.51  | 0.0893 | 0.0079<br>59355 | 0.03398767<br>3 |
| <b>Protein kinase C-binding protein NELL1</b>                  | 0.7<br>75 | 0.642 | 0.936 | 0.096  | 0.0080<br>29163 | 0.03425638<br>7 |
| <b>Eukaryotic translation initiation factor 5A-2</b>           | 1.1<br>6  | 1.039 | 1.296 | 0.0562 | 0.0080<br>66554 | 0.03438645      |
| <b>RNA-binding protein 3</b>                                   | 1.2<br>19 | 1.053 | 1.411 | 0.0748 | 0.0080<br>9908  | 0.03446608<br>5 |
| <b>Ubiquitin-conjugating enzyme E2 K</b>                       | 1.1<br>78 | 1.044 | 1.33  | 0.0619 | 0.0080<br>93815 | 0.03446608<br>5 |
| <b>Ephrin type-B receptor 1</b>                                | 1.2<br>46 | 1.059 | 1.467 | 0.0832 | 0.0081<br>4008  | 0.03458144<br>8 |
| <b>Deoxynucleoside triphosphate triphosphohydrolase SAMHD1</b> | 0.5<br>63 | 0.368 | 0.862 | 0.217  | 0.0081<br>35331 | 0.03458144<br>8 |
| <b>Protein canopy homolog 3</b>                                | 1.1<br>88 | 1.046 | 1.35  | 0.0652 | 0.0081<br>53574 | 0.03460924<br>3 |
| <b>Dynammin-2</b>                                              | 1.1<br>16 | 1.029 | 1.21  | 0.0414 | 0.0081<br>87887 | 0.03472528<br>8 |
| <b>Interferon alpha-16</b>                                     | 0.6<br>76 | 0.505 | 0.904 | 0.148  | 0.0083<br>78261 | 0.03550243<br>4 |
| <b>Anthrax toxin receptor 1</b>                                | 0.6<br>54 | 0.477 | 0.897 | 0.161  | 0.0084<br>04763 | 0.03558445<br>2 |
| <b>T-complex protein 1 subunit theta</b>                       | 1.1<br>28 | 1.031 | 1.234 | 0.0458 | 0.0084<br>8226  | 0.03588205<br>1 |
| <b>Peroxisomal carnitine O-octanoyltransferase</b>             | 1.1<br>66 | 1.04  | 1.307 | 0.0583 | 0.0085<br>54752 | 0.03615798<br>7 |
| <b>Interleukin-17F</b>                                         | 0.6<br>55 | 0.477 | 0.898 | 0.161  | 0.0085<br>82957 | 0.03624643<br>2 |
| <b>Growth hormone variant</b>                                  | 1.1<br>86 | 1.044 | 1.347 | 0.065  | 0.0087<br>63069 | 0.03697569<br>5 |
| <b>D-glucuronyl C5-epimerase</b>                               | 0.6<br>71 | 0.498 | 0.904 | 0.152  | 0.0088<br>13531 | 0.03715713<br>1 |
| <b>Carboxypeptidase B2</b>                                     | 0.4<br>9  | 0.288 | 0.836 | 0.272  | 0.0088<br>63445 | 0.03733594<br>9 |
| <b>Cytoplasmic protein NCK2</b>                                | 1.0<br>9  | 1.022 | 1.163 | 0.033  | 0.0088<br>74107 | 0.03734926<br>5 |
| <b>Kremen protein 1</b>                                        | 1.8<br>7  | 1.17  | 2.991 | 0.24   | 0.0089<br>50907 | 0.03764068<br>2 |
| <b>Tyrosine-protein kinase BTK</b>                             | 1.0<br>89 | 1.021 | 1.16  | 0.0325 | 0.0089<br>61603 | 0.03765385<br>7 |
| <b>Suppressor of cytokine signaling 3</b>                      | 0.6<br>39 | 0.457 | 0.894 | 0.171  | 0.0089<br>72039 | 0.03766592      |
| <b>3-keto-steroid reductase</b>                                | 1.1<br>37 | 1.032 | 1.251 | 0.049  | 0.0089<br>94587 | 0.03772877<br>1 |

|                                                                        |           |       |       |        |                 |                 |
|------------------------------------------------------------------------|-----------|-------|-------|--------|-----------------|-----------------|
| Neurexin-2-beta                                                        | 0.5<br>83 | 0.389 | 0.874 | 0.207  | 0.0090<br>55627 | 0.03795283<br>5 |
| Tubulin-specific chaperone E                                           | 1.0<br>97 | 1.023 | 1.176 | 0.0355 | 0.0090<br>71796 | 0.03798862<br>3 |
| RNA binding protein fox-1 homolog 2                                    | 1.3<br>96 | 1.087 | 1.794 | 0.128  | 0.0090<br>81908 | 0.03799900<br>6 |
| Glutathione reductase, mitochondrial                                   | 0.7<br>38 | 0.587 | 0.928 | 0.117  | 0.0092<br>53999 | 0.03868653<br>2 |
| Leucine-rich repeat transmembrane neuronal protein 4                   | 0.5<br>26 | 0.324 | 0.853 | 0.247  | 0.0092<br>67554 | 0.03871069<br>6 |
| Small glutamine-rich tetratricopeptide repeat-containing protein alpha | 1.1<br>2  | 1.028 | 1.219 | 0.0435 | 0.0092<br>83242 | 0.03874372<br>5 |
| Nectin-2                                                               | 1.6<br>34 | 1.129 | 2.365 | 0.189  | 0.0093<br>09549 | 0.03882097<br>4 |
| Growth/differentiation factor 7                                        | 1.2<br>98 | 1.066 | 1.579 | 0.1    | 0.0093<br>23782 | 0.03884779<br>1 |
| VPS10 domain-containing receptor SorCS1                                | 1.5<br>32 | 1.11  | 2.112 | 0.164  | 0.0093<br>60538 | 0.03896832<br>5 |
| Angiotensinogen                                                        | 0.6<br>99 | 0.534 | 0.916 | 0.138  | 0.0093<br>84167 | 0.03903405<br>7 |
| cGMP-specific 3',5'-cyclic phosphodiesterase                           | 1.1       | 1.024 | 1.182 | 0.0367 | 0.0094<br>12242 | 0.03911815<br>9 |
| BRISC complex subunit Abro1                                            | 1.2<br>39 | 1.054 | 1.456 | 0.0825 | 0.0094<br>43309 | 0.03921454<br>2 |
| Vacuolar protein sorting-associated protein 4A                         | 1.1<br>55 | 1.036 | 1.288 | 0.0555 | 0.0094<br>6437  | 0.03926924<br>7 |
| Arsenite methyltransferase                                             | 0.6<br>62 | 0.485 | 0.904 | 0.159  | 0.0094<br>7254  | 0.03927042      |
| Myeloid zinc finger 1                                                  | 0.6<br>68 | 0.492 | 0.906 | 0.156  | 0.0095<br>44851 | 0.03953728<br>3 |
| Proenkephalin-A                                                        | 1.2<br>82 | 1.062 | 1.548 | 0.0961 | 0.0096<br>17029 | 0.03980315      |
| Bromodomain testis-specific protein                                    | 0.6<br>05 | 0.413 | 0.885 | 0.194  | 0.0096<br>26941 | 0.03981107<br>9 |
| Pro-neuregulin-2, membrane-bound isoform                               | 1.2<br>99 | 1.065 | 1.583 | 0.101  | 0.0096<br>43965 | 0.03984838<br>4 |
| Glutaredoxin-3                                                         | 1.1<br>44 | 1.033 | 1.267 | 0.0521 | 0.0096<br>69587 | 0.03991496<br>4 |
| Phosphatidylinositol transfer protein alpha isoform                    | 0.5<br>2  | 0.316 | 0.853 | 0.253  | 0.0096<br>76112 | 0.03991496<br>4 |
| G antigen 2A                                                           | 1.2<br>43 | 1.054 | 1.465 | 0.0841 | 0.0097<br>48269 | 0.04017933      |
| Inter-alpha-trypsin inhibitor heavy chain H5                           | 1.4<br>11 | 1.087 | 1.831 | 0.133  | 0.0097<br>72735 | 0.04024685<br>5 |
| Receptor-type tyrosine-protein phosphatase H                           | 0.6<br>63 | 0.486 | 0.906 | 0.159  | 0.0097<br>85211 | 0.04026493<br>2 |
| Platelet glycoprotein 4                                                | 0.8<br>04 | 0.681 | 0.949 | 0.0846 | 0.0098<br>1546  | 0.04035605      |
| TATA-binding protein-associated factor 2N                              | 1.2<br>1  | 1.047 | 1.398 | 0.0737 | 0.0098<br>42638 | 0.04040106<br>8 |
| EKC/KEOPS complex subunit TPRKB                                        | 0.6<br>27 | 0.44  | 0.894 | 0.181  | 0.0098<br>34639 | 0.04040106<br>8 |
| ADP-ribosylation factor GTPase-activating protein 1                    | 0.5<br>78 | 0.381 | 0.877 | 0.212  | 0.0098<br>74699 | 0.04049928      |
| Steroid receptor RNA activator 1                                       | 1.3<br>09 | 1.067 | 1.606 | 0.104  | 0.0098<br>87837 | 0.04051978<br>7 |
| Osteopontin                                                            | 1.2<br>67 | 1.058 | 1.516 | 0.0917 | 0.0099<br>42058 | 0.04070847<br>5 |
| Pirin                                                                  | 1.3<br>99 | 1.084 | 1.806 | 0.13   | 0.0100<br>02187 | 0.04092102<br>7 |
| Ubiquitin-conjugating enzyme E2 A                                      | 0.5<br>55 | 0.354 | 0.869 | 0.229  | 0.0100<br>2954  | 0.04099924<br>3 |
| ATP synthase subunit O, mitochondrial                                  | 1.0<br>93 | 1.021 | 1.17  | 0.0347 | 0.0101<br>15333 | 0.04124835<br>6 |
| Chymase                                                                | 0.6<br>98 | 0.531 | 0.918 | 0.14   | 0.0101<br>10361 | 0.04124835<br>6 |
| NAD-dependent protein deacetylase sirtuin-2                            | 0.7<br>86 | 0.654 | 0.944 | 0.0936 | 0.0101<br>06569 | 0.04124835<br>6 |

|                                                                     |           |       |       |        |                 |                 |
|---------------------------------------------------------------------|-----------|-------|-------|--------|-----------------|-----------------|
| <b>Protein CEI</b>                                                  | 0.7<br>5  | 0.602 | 0.934 | 0.112  | 0.0101<br>51874 | 0.04136348<br>9 |
| <b>Interleukin-27 receptor subunit alpha</b>                        | 1.3<br>43 | 1.073 | 1.683 | 0.115  | 0.0101<br>89948 | 0.04148467      |
| <b>Tyrosine-protein kinase Fer</b>                                  | 1.0<br>8  | 1.018 | 1.146 | 0.0301 | 0.0102<br>34613 | 0.04161666<br>4 |
| <b>Forkhead box protein L2</b>                                      | 1.2<br>43 | 1.053 | 1.468 | 0.0847 | 0.0102<br>39087 | 0.04161666<br>4 |
| <b>Mitotic spindle assembly checkpoint protein MAD1</b>             | 0.6<br>22 | 0.433 | 0.894 | 0.185  | 0.0102<br>76749 | 0.04173567<br>3 |
| <b>Stabilin-1</b>                                                   | 0.5<br>42 | 0.339 | 0.865 | 0.239  | 0.0103<br>3585  | 0.04194148<br>2 |
| <b>Nuclear receptor-binding protein</b>                             | 0.6<br>74 | 0.499 | 0.911 | 0.154  | 0.0103<br>55111 | 0.04198542<br>2 |
| <b>TIR domain-containing adapter molecule 2</b>                     | 1.2<br>4  | 1.052 | 1.462 | 0.084  | 0.0104<br>29369 | 0.04225209<br>8 |
| <b>Dual specificity tyrosine-phosphorylation-regulated kinase 3</b> | 0.5<br>64 | 0.364 | 0.874 | 0.224  | 0.0104<br>682   | 0.04237493<br>4 |
| <b>Epithelial discoidin domain-containing receptor 1</b>            | 1.2<br>98 | 1.063 | 1.584 | 0.102  | 0.0104<br>90758 | 0.04243174<br>8 |
| <b>E3 ubiquitin-protein ligase RNF13</b>                            | 0.5<br>61 | 0.36  | 0.874 | 0.226  | 0.0105<br>33381 | 0.04256956<br>5 |
| <b>High mobility group protein B3</b>                               | 0.7<br>19 | 0.558 | 0.926 | 0.129  | 0.0106<br>10772 | 0.04284755<br>2 |
| <b>Protein S100-A4</b>                                              | 0.7<br>23 | 0.564 | 0.927 | 0.127  | 0.0106<br>42484 | 0.04294078<br>3 |
| <b>PEST proteolytic signal-containing nuclear protein</b>           | 1.1<br>37 | 1.03  | 1.254 | 0.0502 | 0.0106<br>56814 | 0.04296378<br>7 |
| <b>cGMP-specific 3',5'-cyclic phosphodiesterase</b>                 | 1.0<br>87 | 1.02  | 1.16  | 0.0328 | 0.0106<br>67326 | 0.04297137<br>2 |
| <b>Synaptotagmin-like protein 4</b>                                 | 1.0<br>78 | 1.018 | 1.142 | 0.0295 | 0.0106<br>9561  | 0.04305047<br>7 |
| <b>AP-1 complex subunit gamma-like 2</b>                            | 1.1<br>11 | 1.025 | 1.204 | 0.0411 | 0.0107<br>43287 | 0.04320745<br>2 |
| <b>Hematological and neurological expressed 1 protein</b>           | 0.8<br>42 | 0.738 | 0.961 | 0.0674 | 0.0107<br>96085 | 0.04336220<br>9 |
| <b>Copper chaperone for superoxide dismutase</b>                    | 0.7<br>69 | 0.628 | 0.941 | 0.103  | 0.0107<br>99185 | 0.04336220<br>9 |
| <b>Mimecan</b>                                                      | 1.2<br>95 | 1.061 | 1.58  | 0.102  | 0.0108<br>53015 | 0.04354324      |
| <b>Angiotensin-related protein 3</b>                                | 1.4<br>3  | 1.086 | 1.885 | 0.141  | 0.0109<br>55862 | 0.04392048<br>2 |
| <b>Interleukin-13</b>                                               | 0.5<br>74 | 0.374 | 0.881 | 0.219  | 0.0110<br>41551 | 0.04422838<br>5 |
| <b>Membrane cofactor protein</b>                                    | 1.7<br>6  | 1.138 | 2.723 | 0.223  | 0.0110<br>68614 | 0.04427068<br>3 |
| <b>TGF-beta receptor type-2</b>                                     | 0.7<br>37 | 0.583 | 0.933 | 0.12   | 0.0110<br>69894 | 0.04427068<br>3 |
| <b>Leucine-rich repeat-containing protein 59</b>                    | 1.0<br>71 | 1.016 | 1.129 | 0.0269 | 0.0110<br>96287 | 0.04434062      |
| <b>Ras-related protein Rab-5B</b>                                   | 1.1<br>4  | 1.03  | 1.262 | 0.0517 | 0.0111<br>15708 | 0.04435137<br>1 |
| <b>Hemoglobin subunit zeta</b>                                      | 0.6<br>61 | 0.481 | 0.91  | 0.163  | 0.0111<br>16793 | 0.04435137<br>1 |
| <b>Exosome complex component RRP43</b>                              | 1.2<br>07 | 1.044 | 1.395 | 0.0741 | 0.0112<br>11533 | 0.04469353<br>2 |
| <b>Cytochrome b5</b>                                                | 1.2<br>57 | 1.053 | 1.5   | 0.0903 | 0.0112<br>89348 | 0.04496773<br>1 |
| <b>Heterogeneous nuclear ribonucleoprotein A/B</b>                  | 1.3<br>01 | 1.061 | 1.594 | 0.104  | 0.0112<br>99318 | 0.04497146<br>5 |
| <b>Tumor necrosis factor receptor superfamily member 12A</b>        | 1.1<br>87 | 1.04  | 1.356 | 0.0678 | 0.0113<br>34495 | 0.04503946<br>6 |
| <b>Beta-casein</b>                                                  | 0.8<br>04 | 0.679 | 0.952 | 0.0863 | 0.0113<br>29565 | 0.04503946<br>6 |
| <b>Pre-mRNA-processing factor 6</b>                                 | 0.6<br>53 | 0.47  | 0.908 | 0.168  | 0.0113<br>5293  | 0.04507674<br>5 |
| <b>Malate dehydrogenase, mitochondrial</b>                          | 1.1<br>1  | 1.024 | 1.204 | 0.0414 | 0.0114<br>86617 | 0.04557120<br>7 |

|                                                             |           |       |       |        |                 |                 |
|-------------------------------------------------------------|-----------|-------|-------|--------|-----------------|-----------------|
| <b>T-cell surface glycoprotein CD5</b>                      | 1.3<br>83 | 1.075 | 1.779 | 0.128  | 0.0115<br>16893 | 0.04565494<br>3 |
| <b>Lysine--tRNA ligase</b>                                  | 1.1<br>18 | 1.025 | 1.219 | 0.0441 | 0.0115<br>31382 | 0.04567601<br>6 |
| <b>Transmembrane and coiled-coil domains protein 3</b>      | 0.7<br>95 | 0.665 | 0.95  | 0.0908 | 0.0115<br>64643 | 0.04577134<br>8 |
| <b>Bis(5'-nucleosyl)-tetrphosphatase [asymmetrical]</b>     | 1.1<br>05 | 1.023 | 1.194 | 0.0395 | 0.0116<br>10411 | 0.04591599<br>3 |
| <b>Calcium-binding protein 7</b>                            | 0.7<br>69 | 0.627 | 0.943 | 0.104  | 0.0116<br>55214 | 0.04605659<br>7 |
| <b>NKG2-E type II integral membrane protein</b>             | 1.3<br>86 | 1.075 | 1.786 | 0.129  | 0.0117<br>29366 | 0.04627615<br>9 |
| <b>Glycine amidinotransferase, mitochondrial</b>            | 1.1<br>25 | 1.026 | 1.232 | 0.0467 | 0.0117<br>29314 | 0.04627615<br>9 |
| <b>2-phosphoxylose phosphatase 1</b>                        | 0.5<br>81 | 0.381 | 0.886 | 0.216  | 0.0117<br>70511 | 0.04640172<br>3 |
| <b>Cold-inducible RNA-binding protein</b>                   | 1.1<br>29 | 1.027 | 1.241 | 0.0483 | 0.0118<br>67439 | 0.04674682      |
| <b>Heat shock 70 kDa protein 1B</b>                         | 1.3<br>25 | 1.064 | 1.649 | 0.112  | 0.0119<br>13212 | 0.04689002<br>5 |
| <b>Cadherin-8</b>                                           | 0.7<br>86 | 0.652 | 0.948 | 0.0958 | 0.0119<br>88496 | 0.04714907      |
| <b>Neurotrimin</b>                                          | 0.6<br>5  | 0.464 | 0.911 | 0.172  | 0.0123<br>09833 | 0.04837463      |
| <b>Eukaryotic translation initiation factor 3 subunit G</b> | 1.1<br>36 | 1.028 | 1.256 | 0.0511 | 0.0123<br>55834 | 0.04840259<br>6 |
| <b>Toll-interacting protein</b>                             | 1.1       | 1.021 | 1.185 | 0.038  | 0.0123<br>48544 | 0.04840259<br>6 |
| <b>BTB/POZ domain-containing protein KCTD5</b>              | 0.5<br>69 | 0.366 | 0.885 | 0.225  | 0.0123<br>38795 | 0.04840259<br>6 |
| <b>Neuron-specific vesicular protein calcyon</b>            | 1.3<br>44 | 1.066 | 1.693 | 0.118  | 0.0123<br>47364 | 0.04840259<br>6 |
| <b>Chloride channel protein ClC-Kb</b>                      | 1.1<br>5  | 1.031 | 1.283 | 0.0558 | 0.0124<br>20767 | 0.04861871<br>2 |
| <b>Extracellular superoxide dismutase [Cu-Zn]</b>           | 1.2<br>68 | 1.052 | 1.527 | 0.095  | 0.0124<br>84808 | 0.04883099<br>6 |
| <b>Keratin, type II cytoskeletal 7</b>                      | 0.7<br>13 | 0.546 | 0.93  | 0.136  | 0.0124<br>98733 | 0.04884708<br>9 |
| <b>Ubiquitin thioesterase OTUB2</b>                         | 0.6<br>67 | 0.486 | 0.917 | 0.162  | 0.0126<br>52609 | 0.04940967<br>7 |
| <b>PIK3CA/PIK3R1</b>                                        | 1.2<br>11 | 1.042 | 1.407 | 0.0767 | 0.0127<br>18267 | 0.04962715<br>5 |
| <b>Acyl-CoA-binding protein</b>                             | 1.2<br>16 | 1.043 | 1.419 | 0.0787 | 0.0127<br>86465 | 0.04985419<br>6 |
| <b>Pregnancy-specific beta-1-glycoprotein 3</b>             | 1.2<br>85 | 1.055 | 1.566 | 0.101  | 0.0128<br>22956 | 0.04995735<br>3 |
| <b>NmrA-like family domain-containing protein 1</b>         | 1.1<br>73 | 1.034 | 1.33  | 0.0641 | 0.0128<br>41856 | 0.04999186<br>8 |

Supplemental Figure 1: Barchart of absolute weights from 140 proteins prioritized by LASSO model. Tetranectin and fibulin-1 model weights were significantly higher than other protein weights in developed LASSO on EXSCEL proteomics cohort. Barchart of absolute weights from 140 LASSO model proteins. Tetranectin and fibulin-1 (blue) had significantly higher absolute weight values compared to the other heavily ranked proteins that were predictive

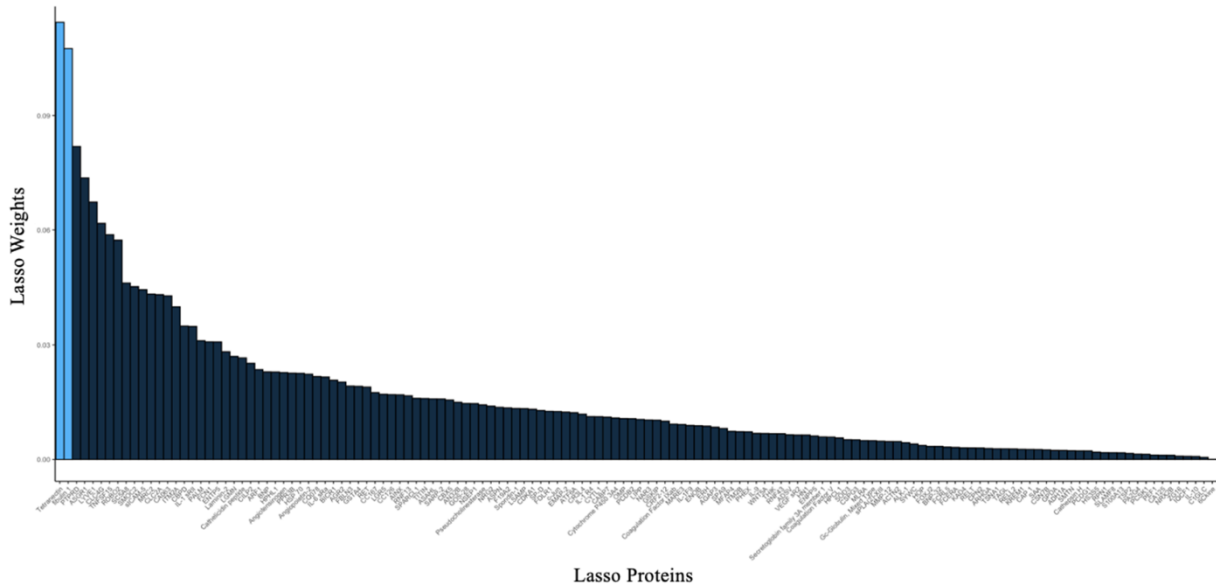

Supplement Table 5: LASSO model weights of 140 prioritized proteins in EXSCEL proteomics cohort. These weights were used to calculate the EXSCEL protein score. Bolded proteins are significantly modified by GLP-1 RA treatment at 12 months in linear mixed modeling (p-value <0.05). KEGG pathway annotation represents curated annotations based on established gene/protein function. Formal statistical pathway enrichment analysis was underpowered at this set size and did not achieve FDR-corrected significance.

| Protein                                                        | LASSO Coefficient | GLP-1 RA Modified | Coefficient Direction | KEGG Pathway Annotation                                                                    |
|----------------------------------------------------------------|-------------------|-------------------|-----------------------|--------------------------------------------------------------------------------------------|
| <b>Tetranectin</b>                                             | <b>-0.1144036</b> | <b>Yes</b>        | <b>Protective</b>     | <b>hsa04512: ECM-receptor interaction</b>                                                  |
| Receptor-type tyrosine-protein phosphatase delta               | -0.0819269        | No                | Protective            | hsa04014: Ras signaling pathway                                                            |
| <b>Lymphatic vessel endothelial hyaluronic acid receptor 1</b> | <b>-0.0673018</b> | <b>Yes</b>        | <b>Protective</b>     | <b>hsa04151: PI3K-Akt signaling pathway</b>                                                |
| Carboxypeptidase D                                             | -0.0349034        | No                | Protective            | hsa04614: Renin-angiotensin system                                                         |
| <b>Interleukin-1 receptor type 2</b>                           | <b>-0.0348093</b> | <b>Yes</b>        | <b>Protective</b>     | <b>hsa04060: Cytokine-cytokine receptor interaction; hsa04657: IL-17 signaling pathway</b> |

|                                                             |                   |            |                   |                                                                                                             |
|-------------------------------------------------------------|-------------------|------------|-------------------|-------------------------------------------------------------------------------------------------------------|
| <b>Ectonucleoside triphosphate diphosphohydrolase 5</b>     | <b>-0.0307437</b> | <b>Yes</b> | <b>Protective</b> | <b>hsa04141: Protein processing in endoplasmic reticulum; hsa00230: Purine metabolism</b>                   |
| Legumain                                                    | -0.0269726        | No         | Protective        | hsa04142: Lysosome                                                                                          |
| <b>Cathelicidin antimicrobial peptide</b>                   | <b>-0.0265670</b> | <b>Yes</b> | <b>Protective</b> | <b>hsa04620: Toll-like receptor signaling pathway; hsa04062: Chemokine signaling pathway</b>                |
| Cartilage intermediate layer protein 2                      | -0.0251522        | No         | Protective        | hsa04512: ECM-receptor interaction                                                                          |
| Hephaestin-like protein 1                                   | -0.0228667        | No         | Protective        | hsa04216: Ferroptosis                                                                                       |
| Angiotensinogen                                             | -0.0227303        | No         | Protective        | hsa04614: Renin-angiotensin system                                                                          |
| Protein phosphatase 1 regulatory subunit 3B                 | -0.0225943        | No         | Protective        | hsa04910: Insulin signaling pathway; hsa00500: Starch and sucrose metabolism                                |
| <b>Heat shock 70 kDa protein 1A</b>                         | <b>-0.0225457</b> | <b>Yes</b> | <b>Protective</b> | <b>hsa04141: Protein processing in endoplasmic reticulum; hsa04010: MAPK signaling pathway</b>              |
| Uncharacterized protein C17orf78                            | -0.0216699        | No         | Protective        | Not annotated in KEGG                                                                                       |
| Interleukin-6 receptor subunit alpha                        | -0.0215328        | No         | Protective        | hsa04060: Cytokine-cytokine receptor interaction; hsa04630: JAK-STAT signaling pathway                      |
| Anterior gradient protein 2 homolog                         | -0.0202313        | No         | Protective        | hsa04141: Protein processing in endoplasmic reticulum                                                       |
| <b>Proto-oncogene tyrosine-protein kinase receptor Ret</b>  | <b>-0.0189000</b> | <b>Yes</b> | <b>Protective</b> | <b>hsa04010: MAPK signaling pathway; hsa04151: PI3K-Akt signaling pathway; hsa05200: Pathways in cancer</b> |
| Coiled-coil domain-containing protein 167                   | -0.0174728        | No         | Protective        | Not annotated in KEGG                                                                                       |
| Leucine-rich repeat-containing G-protein coupled receptor 5 | -0.0170453        | No         | Protective        | hsa04310: Wnt signaling pathway                                                                             |
| Coiled-coil domain-containing protein 126                   | -0.0169396        | No         | Protective        | Not annotated in KEGG                                                                                       |
| E3 ubiquitin-protein ligase RNF13                           | -0.0166299        | No         | Protective        | hsa04120: Ubiquitin mediated proteolysis                                                                    |
| SPARC-like protein 1                                        | -0.0159788        | No         | Protective        | hsa04512: ECM-receptor interaction                                                                          |
| <b>N-acyl ethanolamine-hydrolyzing acid amidase</b>         | <b>-0.0158083</b> | <b>Yes</b> | <b>Protective</b> | <b>hsa00591: Linoleic acid metabolism; hsa04726: Serotonergic synapse</b>                                   |
| <b>Cholinesterase</b>                                       | <b>-0.0142508</b> | <b>Yes</b> | <b>Protective</b> | <b>hsa00564: Glycerophospholipid metabolism;</b>                                                            |

|                                                                    |                   |            |                   |                                                                                                                     |
|--------------------------------------------------------------------|-------------------|------------|-------------------|---------------------------------------------------------------------------------------------------------------------|
|                                                                    |                   |            |                   | <b>hsa04725: Cholinergic synapse</b>                                                                                |
| <b>Asporin</b>                                                     | <b>-0.0136156</b> | <b>Yes</b> | <b>Protective</b> | <b>hsa04512: ECM-receptor interaction;</b><br><b>hsa04350: TGF-beta signaling pathway</b>                           |
| Protein FAM19A2                                                    | -0.0134619        | No         | Protective        | Not annotated in KEGG                                                                                               |
| Endothelial monocyte-activating polypeptide 2                      | -0.0123383        | No         | Protective        | hsa04141: Protein processing in endoplasmic reticulum                                                               |
| <b>Cyclic AMP-dependent transcription factor ATF-6 alpha</b>       | <b>-0.0121858</b> | <b>Yes</b> | <b>Protective</b> | <b>hsa04141: Protein processing in endoplasmic reticulum;</b><br><b>hsa04932: Non-alcoholic fatty liver disease</b> |
| Calcium-binding protein 7                                          | -0.0110565        | No         | Protective        | hsa04020: Calcium signaling pathway                                                                                 |
| Cytochrome P450 3A4                                                | -0.0108413        | No         | Protective        | hsa00140: Steroid hormone biosynthesis;<br>hsa00590: Arachidonic acid metabolism                                    |
| Olfactory marker protein                                           | -0.0106942        | No         | Protective        | Not annotated in KEGG                                                                                               |
| Protocadherin beta-2                                               | -0.0106625        | No         | Protective        | hsa04514: Cell adhesion molecules                                                                                   |
| <b>Pancreatic triacylglycerol lipase</b>                           | <b>-0.0104663</b> | <b>Yes</b> | <b>Protective</b> | <b>hsa00561: Glycerolipid metabolism;</b><br><b>hsa04972: Pancreatic secretion</b>                                  |
| <b>Ecto-ADP-ribosyltransferase 3</b>                               | <b>-0.0102957</b> | <b>Yes</b> | <b>Protective</b> | <b>Not annotated in KEGG</b>                                                                                        |
| Coagulation factor IXab                                            | -0.0092280        | No         | Protective        | hsa04610: Complement and coagulation cascades                                                                       |
| <b>Beta-enolase</b>                                                | <b>-0.0088046</b> | <b>Yes</b> | <b>Protective</b> | <b>hsa00010: Glycolysis / Gluconeogenesis;</b><br><b>hsa01200: Carbon metabolism</b>                                |
| Arf-GAP with GTPase, ANK repeat and PH domain-containing protein 3 | -0.0084468        | No         | Protective        | hsa04144: Endocytosis                                                                                               |
| 3-ketoacyl-CoA thiolase, peroxisomal                               | -0.0067187        | No         | Protective        | hsa00071: Fatty acid degradation; hsa00280: Valine, leucine and isoleucine degradation                              |
| E3 ubiquitin-protein ligase RNF43                                  | -0.0067051        | No         | Protective        | hsa04310: Wnt signaling pathway;<br>hsa04120: Ubiquitin mediated proteolysis                                        |
| Vascular endothelial growth factor receptor 2                      | -0.0063902        | No         | Protective        | hsa04370: VEGF signaling pathway;<br>hsa04066: HIF-1 signaling pathway                                              |
| <b>Hematological and neurological expressed 1 protein</b>          | <b>-0.0063893</b> | <b>Yes</b> | <b>Protective</b> | <b>Not annotated in KEGG</b>                                                                                        |
| Ectonucleotide pyrophosphatase/phospho                             | -0.0061387        | No         | Protective        | hsa00230: Purine metabolism                                                                                         |

|                                                           |                   |            |                   |                                                                                                          |
|-----------------------------------------------------------|-------------------|------------|-------------------|----------------------------------------------------------------------------------------------------------|
| diesterase family member 5                                |                   |            |                   |                                                                                                          |
| Coagulation Factor V                                      | -0.0058480        | No         | Protective        | hsa04610: Complement and coagulation cascades                                                            |
| Hippocalcin-like protein 1                                | -0.0056220        | No         | Protective        | hsa04020: Calcium signaling pathway                                                                      |
| Neurocan core protein                                     | -0.0051238        | No         | Protective        | hsa04514: Cell adhesion molecules; hsa05205: Proteoglycans in cancer                                     |
| Myosin regulatory light chain 2, atrial isoform           | -0.0049108        | No         | Protective        | hsa04260: Cardiac muscle contraction; hsa05410: Hypertrophic cardiomyopathy                              |
| <b>Vitamin D-binding protein</b>                          | <b>-0.0048845</b> | <b>Yes</b> | <b>Protective</b> | <b>hsa04978: Mineral absorption; hsa04961: Endocrine and other factor-regulated calcium reabsorption</b> |
| <b>Group XIIB secretory phospholipase A2-like protein</b> | <b>-0.0047474</b> | <b>Yes</b> | <b>Protective</b> | <b>hsa00564: Glycerophospholipid metabolism; hsa04726: Serotonergic synapse</b>                          |
| Homeodomain-only protein                                  | -0.0036615        | No         | Protective        | Not annotated in KEGG                                                                                    |
| Tumor necrosis factor receptor superfamily member 19L     | -0.0030058        | No         | Protective        | hsa04060: Cytokine-cytokine receptor interaction                                                         |
| Carboxypeptidase N subunit 2                              | -0.0029891        | No         | Protective        | hsa04610: Complement and coagulation cascades                                                            |
| <b>Rho guanine nucleotide exchange factor 10</b>          | <b>-0.0028605</b> | <b>Yes</b> | <b>Protective</b> | <b>hsa04014: Ras signaling pathway; hsa04810: Regulation of actin cytoskeleton</b>                       |
| t-SNARE domain-containing protein 1                       | -0.0027782        | No         | Protective        | hsa04130: SNARE interactions in vesicular transport                                                      |
| RELT-like protein 2                                       | -0.0027351        | No         | Protective        | hsa04060: Cytokine-cytokine receptor interaction                                                         |
| COP9 signalosome complex subunit 7b                       | -0.0024822        | No         | Protective        | hsa04120: Ubiquitin mediated proteolysis                                                                 |
| Glycerol-3-phosphate dehydrogenase [NAD(+)], cytoplasmic  | -0.0023579        | No         | Protective        | hsa00561: Glycerolipid metabolism; hsa00010: Glycolysis / Gluconeogenesis                                |
| <b>Alcohol dehydrogenase 1A</b>                           | <b>-0.0023449</b> | <b>Yes</b> | <b>Protective</b> | <b>hsa00830: Retinol metabolism; hsa00010: Glycolysis / Gluconeogenesis</b>                              |
| Heparan sulfate glucosamine 3-O-sulfotransferase 5        | -0.0019362        | No         | Protective        | hsa00534: Glycosaminoglycan biosynthesis — heparan sulfate / heparin                                     |
| Neurexin-2-beta                                           | -0.0010892        | No         | Protective        | hsa04514: Cell adhesion molecules; hsa04723: Retrograde                                                  |

|                                                                          |                   |            |                        |                                                                                                                       |
|--------------------------------------------------------------------------|-------------------|------------|------------------------|-----------------------------------------------------------------------------------------------------------------------|
|                                                                          |                   |            |                        | endocannabinoid signaling                                                                                             |
| <b>IQ domain-containing protein F1</b>                                   | <b>-0.0008098</b> | <b>Yes</b> | <b>Protective</b>      | <b>Not annotated in KEGG</b>                                                                                          |
| <b>C1GALT1-specific chaperone 1</b>                                      | <b>-0.0005396</b> | <b>Yes</b> | <b>Protective</b>      | <b>hsa00512: Mucin type O-glycan biosynthesis</b>                                                                     |
| C-C motif chemokine 21                                                   | -0.0000495        | No         | Protective             | hsa04060: Cytokine-cytokine receptor interaction; hsa04062: Chemokine signaling pathway                               |
| Interleukin-10                                                           | 0.0007721         | No         | Risk-associated        | hsa04060: Cytokine-cytokine receptor interaction; hsa04630: JAK-STAT signaling pathway                                |
| <b>Zymogen granule membrane protein 16</b>                               | <b>0.0008521</b>  | <b>Yes</b> | <b>Risk-associated</b> | <b>Not annotated in KEGG</b>                                                                                          |
| <b>Mucin-16</b>                                                          | <b>0.0010985</b>  | <b>Yes</b> | <b>Risk-associated</b> | <b>hsa05205: Proteoglycans in cancer</b>                                                                              |
| <b>Peflin</b>                                                            | <b>0.0011325</b>  | <b>Yes</b> | <b>Risk-associated</b> | <b>Not annotated in KEGG</b>                                                                                          |
| ProSAAS                                                                  | 0.0013540         | No         | Risk-associated        | hsa04024: cAMP signaling pathway                                                                                      |
| Proliferation-associated protein 2G4                                     | 0.0013894         | No         | Risk-associated        | hsa03008: Ribosome biogenesis in eukaryotes                                                                           |
| <b>Thrombospondin-2</b>                                                  | <b>0.0015784</b>  | <b>Yes</b> | <b>Risk-associated</b> | <b>hsa04512: ECM-receptor interaction; hsa04350: TGF-beta signaling pathway; hsa04151: PI3K-Akt signaling pathway</b> |
| <b>Protein S100-A13</b>                                                  | <b>0.0017507</b>  | <b>Yes</b> | <b>Risk-associated</b> | <b>hsa04020: Calcium signaling pathway; hsa04010: MAPK signaling pathway</b>                                          |
| SLAM family member 8                                                     | 0.0017739         | No         | Risk-associated        | hsa04650: Natural killer cell mediated cytotoxicity                                                                   |
| Dolichyl-diphosphooligosaccharide--protein glycosyltransferase subunit 1 | 0.0017899         | No         | Risk-associated        | hsa00510: N-Glycan biosynthesis; hsa04141: Protein processing in endoplasmic reticulum                                |
| <b>Protocadherin gamma-A1</b>                                            | <b>0.0022281</b>  | <b>Yes</b> | <b>Risk-associated</b> | <b>hsa04514: Cell adhesion molecules</b>                                                                              |
| Cathepsin H                                                              | 0.0022339         | No         | Risk-associated        | hsa04142: Lysosome                                                                                                    |
| Smoothelin                                                               | 0.0022696         | No         | Risk-associated        | hsa04270: Vascular smooth muscle contraction                                                                          |
| Serum amyloid A-1 protein                                                | 0.0025752         | No         | Risk-associated        | hsa04610: Complement and coagulation cascades; hsa04060: Cytokine-cytokine receptor interaction                       |
| Adenylyl cyclase-associated protein 1                                    | 0.0026071         | No         | Risk-associated        | hsa04810: Regulation of actin cytoskeleton                                                                            |

|                                                             |                  |            |                        |                                                                                                                        |
|-------------------------------------------------------------|------------------|------------|------------------------|------------------------------------------------------------------------------------------------------------------------|
| <b>Kremen protein 1</b>                                     | <b>0.0026340</b> | <b>Yes</b> | <b>Risk-associated</b> | <b>hsa04310: Wnt signaling pathway</b>                                                                                 |
| Transgelin                                                  | 0.0027647        | No         | Risk-associated        | hsa04270: Vascular smooth muscle contraction                                                                           |
| Adenylate kinase 4, mitochondrial                           | 0.0030256        | No         | Risk-associated        | hsa00230: Purine metabolism                                                                                            |
| High affinity immunoglobulin epsilon receptor subunit alpha | 0.0031375        | No         | Risk-associated        | hsa04664: Fc epsilon RI signaling pathway                                                                              |
| Fc receptor-like protein 5                                  | 0.0032252        | No         | Risk-associated        | hsa04662: B cell receptor signaling pathway                                                                            |
| Brain natriuretic peptide 32                                | 0.0034024        | No         | Risk-associated        | hsa04022: cGMP-PKG signaling pathway; hsa04924: Renin secretion                                                        |
| <b>Forkhead box protein J2</b>                              | <b>0.0034035</b> | <b>Yes</b> | <b>Risk-associated</b> | <b>Not annotated in KEGG</b>                                                                                           |
| Tryptophan--tRNA ligase, cytoplasmic                        | 0.0040519        | No         | Risk-associated        | hsa00970: Aminoacyl-tRNA biosynthesis                                                                                  |
| Serine/threonine-protein kinase receptor R3 (ALK1/ACVRL1)   | 0.0043671        | No         | Risk-associated        | hsa04350: TGF-beta signaling pathway; hsa04390: Hippo signaling pathway                                                |
| <b>Alpha-actinin-2</b>                                      | <b>0.0046523</b> | <b>Yes</b> | <b>Risk-associated</b> | <b>hsa04260: Cardiac muscle contraction; hsa04512: ECM-receptor interaction; hsa05410: Hypertrophic cardiomyopathy</b> |
| Macrophage metalloelastase (MMP-12)                         | 0.0046596        | No         | Risk-associated        | hsa04657: IL-17 signaling pathway; hsa04668: TNF signaling pathway; hsa05205: Proteoglycans in cancer                  |
| <b>Extracellular superoxide dismutase [Cu-Zn]</b>           | <b>0.0051657</b> | <b>Yes</b> | <b>Risk-associated</b> | <b>hsa04146: Peroxisome; hsa04066: HIF-1 signaling pathway</b>                                                         |
| <b>Secretoglobulin family 3A member 1</b>                   | <b>0.0058897</b> | <b>Yes</b> | <b>Risk-associated</b> | <b>Not annotated in KEGG</b>                                                                                           |
| Adseverin                                                   | 0.0064489        | No         | Risk-associated        | hsa04810: Regulation of actin cytoskeleton                                                                             |
| <b>Protein Wnt-5a</b>                                       | <b>0.0067667</b> | <b>Yes</b> | <b>Risk-associated</b> | <b>hsa04310: Wnt signaling pathway; hsa04550: Signaling pathways regulating pluripotency of stem cells</b>             |
| Interleukin-9                                               | 0.0067941        | No         | Risk-associated        | hsa04060: Cytokine-cytokine receptor interaction; hsa04630: JAK-STAT signaling pathway                                 |
| Phosphate-regulating neutral endopeptidase                  | 0.0072363        | No         | Risk-associated        | hsa04978: Mineral absorption                                                                                           |

|                                                                |                  |            |                        |                                                                                                                                               |
|----------------------------------------------------------------|------------------|------------|------------------------|-----------------------------------------------------------------------------------------------------------------------------------------------|
| Integral membrane protein 2B                                   | 0.0072751        | No         | Risk-associated        | Not annotated in KEGG                                                                                                                         |
| <b>Microfibril-associated glycoprotein 4</b>                   | <b>0.0073704</b> | <b>Yes</b> | <b>Risk-associated</b> | <b>hsa04610: Complement and coagulation cascades; hsa04512: ECM-receptor interaction</b>                                                      |
| Serpin A9                                                      | 0.0080908        | No         | Risk-associated        | hsa04610: Complement and coagulation cascades                                                                                                 |
| Enhancer of rudimentary homolog                                | 0.0087087        | No         | Risk-associated        | Not annotated in KEGG                                                                                                                         |
| Interleukin-36 gamma                                           | 0.0088890        | No         | Risk-associated        | hsa04060: Cytokine-cytokine receptor interaction; hsa04621: NOD-like receptor signaling pathway                                               |
| Microtubule-associated protein RP/EB family member 3           | 0.0091291        | No         | Risk-associated        | hsa04810: Regulation of actin cytoskeleton                                                                                                    |
| <b>Interferon lambda receptor 1</b>                            | <b>0.0099568</b> | <b>Yes</b> | <b>Risk-associated</b> | <b>hsa04060: Cytokine-cytokine receptor interaction; hsa04630: JAK-STAT signaling pathway; hsa04620: Toll-like receptor signaling pathway</b> |
| GSK3-beta interaction protein                                  | 0.0102466        | No         | Risk-associated        | hsa04310: Wnt signaling pathway                                                                                                               |
| Cytokine-like protein 1                                        | 0.0111680        | No         | Risk-associated        | Not annotated in KEGG                                                                                                                         |
| <b>Interleukin-1 receptor-like 1 (ST2)</b>                     | <b>0.0111952</b> | <b>Yes</b> | <b>Risk-associated</b> | <b>hsa04060: Cytokine-cytokine receptor interaction; hsa04657: IL-17 signaling pathway; hsa04010: MAPK signaling pathway</b>                  |
| Cyclic AMP-responsive element-binding protein 3-like protein 4 | 0.0118293        | No         | Risk-associated        | hsa04141: Protein processing in endoplasmic reticulum; hsa04010: MAPK signaling pathway                                                       |
| Transcription factor AP-1                                      | 0.0125082        | No         | Risk-associated        | hsa04010: MAPK signaling pathway; hsa04668: TNF signaling pathway; hsa04620: Toll-like receptor signaling pathway                             |
| Folate receptor alpha                                          | 0.0125792        | No         | Risk-associated        | hsa00790: Folate biosynthesis; hsa04977: Vitamin digestion and absorption                                                                     |
| <b>Pulmonary surfactant-associated protein D</b>               | <b>0.0128089</b> | <b>Yes</b> | <b>Risk-associated</b> | <b>hsa04610: Complement and coagulation cascades; hsa04620: Toll-like receptor signaling pathway</b>                                          |

|                                                                      |                  |            |                        |                                                                                                                 |
|----------------------------------------------------------------------|------------------|------------|------------------------|-----------------------------------------------------------------------------------------------------------------|
| Cyclin-dependent kinase 2-associated protein 1                       | 0.0131103        | No         | Risk-associated        | hsa04110: Cell cycle                                                                                            |
| Limbic system-associated membrane protein                            | 0.0132564        | No         | Risk-associated        | hsa04514: Cell adhesion molecules                                                                               |
| Spondin-1                                                            | 0.0133010        | No         | Risk-associated        | hsa04512: ECM-receptor interaction                                                                              |
| Pro-neuregulin-2, membrane-bound isoform                             | 0.0139333        | No         | Risk-associated        | hsa04012: ErbB signaling pathway; hsa04010: MAPK signaling pathway                                              |
| Nuclease-sensitive element-binding protein 1                         | 0.0145572        | No         | Risk-associated        | hsa03013: RNA transport                                                                                         |
| Golgi SNAP receptor complex member 1                                 | 0.0145995        | No         | Risk-associated        | hsa04130: SNARE interactions in vesicular transport                                                             |
| <b>Acidic leucine-rich nuclear phosphoprotein 32 family member B</b> | <b>0.0149600</b> | <b>Yes</b> | <b>Risk-associated</b> | <b>hsa04210: Apoptosis</b>                                                                                      |
| Chromobox protein homolog 5                                          | 0.0155012        | No         | Risk-associated        | Not annotated in KEGG                                                                                           |
| Secreted frizzled-related protein 1                                  | 0.0157873        | No         | Risk-associated        | hsa04310: Wnt signaling pathway                                                                                 |
| Titin                                                                | 0.0159108        | No         | Risk-associated        | hsa04260: Cardiac muscle contraction; hsa04512: ECM-receptor interaction; hsa05410: Hypertrophic cardiomyopathy |
| Alpha-internexin                                                     | 0.0168776        | No         | Risk-associated        | Not annotated in KEGG                                                                                           |
| Glutathione S-transferase A4                                         | 0.0190983        | No         | Risk-associated        | hsa00480: Glutathione metabolism; hsa04146: Peroxisome                                                          |
| <b>EGF-containing fibulin-like extracellular matrix protein 1</b>    | <b>0.0191681</b> | <b>Yes</b> | <b>Risk-associated</b> | <b>hsa04512: ECM-receptor interaction; hsa04151: PI3K-Akt signaling pathway</b>                                 |
| Bicaudal D-related protein 1                                         | 0.0207053        | No         | Risk-associated        | Not annotated in KEGG                                                                                           |
| <b>Angiopoietin-2</b>                                                | <b>0.0223188</b> | <b>Yes</b> | <b>Risk-associated</b> | <b>hsa04151: PI3K-Akt signaling pathway; hsa04014: Ras signaling pathway; hsa04066: HIF-1 signaling pathway</b> |
| Natriuretic peptides B                                               | 0.0228994        | No         | Risk-associated        | hsa04022: cGMP-PKG signaling pathway; hsa04924: Renin secretion                                                 |
| <b>ADP-ribosylation factor 1</b>                                     | <b>0.0235128</b> | <b>Yes</b> | <b>Risk-associated</b> | <b>hsa04144: Endocytosis; hsa04130: SNARE interactions in vesicular transport</b>                               |
| <b>Laminin-2</b>                                                     | <b>0.0281958</b> | <b>Yes</b> | <b>Risk-associated</b> | <b>hsa04512: ECM-receptor interaction; hsa04151: PI3K-Akt signaling pathway; hsa04510: Focal adhesion</b>       |

|                                                    |                  |            |                        |                                                                                   |
|----------------------------------------------------|------------------|------------|------------------------|-----------------------------------------------------------------------------------|
| <b>Ficolin-1</b>                                   | <b>0.0307750</b> | <b>Yes</b> | <b>Risk-associated</b> | <b>hsa04610: Complement and coagulation cascades</b>                              |
| Paralemmin-1                                       | 0.0311002        | No         | Risk-associated        | Not annotated in KEGG                                                             |
| <b>Integral membrane protein 2A</b>                | <b>0.0399496</b> | <b>Yes</b> | <b>Risk-associated</b> | <b>Not annotated in KEGG</b>                                                      |
| Arginine/serine-rich protein 1                     | 0.0428071        | No         | Risk-associated        | Not annotated in KEGG                                                             |
| C-type lectin domain family 2 member A             | 0.0431430        | No         | Risk-associated        | hsa04650: Natural killer cell mediated cytotoxicity                               |
| <b>C-type mannose receptor 2</b>                   | <b>0.0432888</b> | <b>Yes</b> | <b>Risk-associated</b> | <b>hsa04145: Phagosome; hsa05152: Tuberculosis</b>                                |
| <b>Intercellular adhesion molecule 5</b>           | <b>0.0444052</b> | <b>Yes</b> | <b>Risk-associated</b> | <b>hsa04514: Cell adhesion molecules; hsa04510: Focal adhesion</b>                |
| SPARC-related modular calcium-binding protein 2    | 0.0452497        | No         | Risk-associated        | hsa04512: ECM-receptor interaction                                                |
| Sodium-coupled monocarboxylate transporter 1       | 0.0461607        | No         | Risk-associated        | hsa04978: Mineral absorption                                                      |
| <b>Roundabout homolog 2</b>                        | <b>0.0573680</b> | <b>Yes</b> | <b>Risk-associated</b> | <b>hsa04360: Axon guidance</b>                                                    |
| Tumor necrosis factor ligand superfamily member 15 | 0.0587732        | No         | Risk-associated        | hsa04060: Cytokine-cytokine receptor interaction; hsa04668: TNF signaling pathway |
| C-type lectin domain family 4 member G             | 0.0617585        | No         | Risk-associated        | hsa04650: Natural killer cell mediated cytotoxicity                               |
| Asialoglycoprotein receptor 1                      | 0.0736696        | No         | Risk-associated        | hsa04144: Endocytosis                                                             |
| Fibulin-1                                          | 0.1074668        | No         | Risk-associated        | hsa04512: ECM-receptor interaction; hsa04151: PI3K-Akt signaling pathway          |

Supplemental Table 6: *Pairwise bootstrap comparisons of  $\Delta$ AUPRC among proteomic machine-learning models in the EXSCEL held-out test set.* Pairwise differences in area under the precision-recall curve ( $\Delta$ AUPRC) are shown for LASSO, elastic net, gradient boosted trees, and random forest models. Values are reported as  $\Delta$ AUPRC with 95% confidence intervals and paired bootstrap p-values derived from stratified nonparametric bootstrap resampling of the held-out test set.

| <b>Model comparison</b>                 | <b><math>\Delta</math>AUPRC (95% CI)</b> | <b>p-value</b> |
|-----------------------------------------|------------------------------------------|----------------|
| LASSO vs Elastic Net                    | 0.020 (-0.002, 0.043)                    | 0.074          |
| LASSO vs Gradient Boosted Trees         | 0.040 (-0.002, 0.081)                    | 0.063          |
| LASSO vs Random Forest                  | 0.089 (0.043, 0.140)                     | <0.001         |
| Elastic Net vs Gradient Boosted Trees   | 0.020 (-0.015, 0.052)                    | 0.233          |
| Elastic Net vs Random Forest            | 0.069 (0.028, 0.113)                     | <0.001         |
| Gradient Boosted Trees vs Random Forest | 0.048 (0.011, 0.092)                     | 0.010          |

Supplemental Table 7: *Pairwise bootstrap comparisons of  $\Delta$ AUPRC among clinical and proteomic prediction models in the EXSCEL held-out test set.* Pairwise differences in area under the precision-recall curve ( $\Delta$ AUPRC) are shown for the clinical-only, protein-only, protein + clinical, and clinical + tetranectin + fibulin-1 models. Values are reported as  $\Delta$ AUPRC with 95% confidence intervals and paired bootstrap p-values derived from stratified nonparametric bootstrap resampling of the held-out test set.

| <b>Model comparison</b>                                  | <b><math>\Delta</math>AUPRC (95% CI)</b> | <b>p-value</b> |
|----------------------------------------------------------|------------------------------------------|----------------|
| Protein only vs Clinical only                            | 0.158 (0.103, 0.214)                     | <0.001         |
| Protein + Clinical vs Clinical only                      | 0.206 (0.144, 0.265)                     | <0.001         |
| Clinical + tetranectin + fibulin-1 vs Clinical only      | 0.044 (0.007, 0.082)                     | 0.017          |
| Protein + Clinical vs Protein only                       | 0.048 (0.022, 0.073)                     | <0.001         |
| Clinical + tetranectin + fibulin-1 vs Protein only       | -0.113 (-0.170, -0.061)                  | <0.001         |
| Protein + Clinical vs Clinical + tetranectin + fibulin-1 | 0.162 (0.105, 0.218)                     | <0.001         |

| <b>Model comparison</b>                                  | <b><math>\Delta</math>AUPRC (95% CI)</b> | <b>p-value</b> |
|----------------------------------------------------------|------------------------------------------|----------------|
| Protein only vs Clinical only                            | 0.158 (0.103, 0.214)                     | <0.001         |
| Protein + Clinical vs Clinical only                      | 0.206 (0.144, 0.265)                     | <0.001         |
| Clinical + Tetranectin + Fibulin-1 vs Clinical only      | 0.044 (0.007, 0.082)                     | 0.017          |
| Protein + Clinical vs Protein only                       | 0.048 (0.022, 0.073)                     | <0.001         |
| Clinical + Tetranectin + Fibulin-1 vs Protein only       | -0.113 (-0.170, -0.061)                  | <0.001         |
| Protein + Clinical vs Clinical + Tetranectin + Fibulin-1 | 0.162 (0.105, 0.218)                     | <0.001         |

Supplement Figure 2: *Boxplot of tetranectin levels stratified by MACE and history of ASCVD in EXSCEL proteomics cohort.* ANOVA testing of mean tetranectin levels in MACE+ individuals +/- history of ASCVD had significantly lower levels of circulating baseline tetranectin compared to MACE- individuals,  $p = 0.038$ . ASCVD+/MACE+ individuals had the lowest mean levels of

circulating tetranectin compared to all other groups. \*Significant p-value <0.05

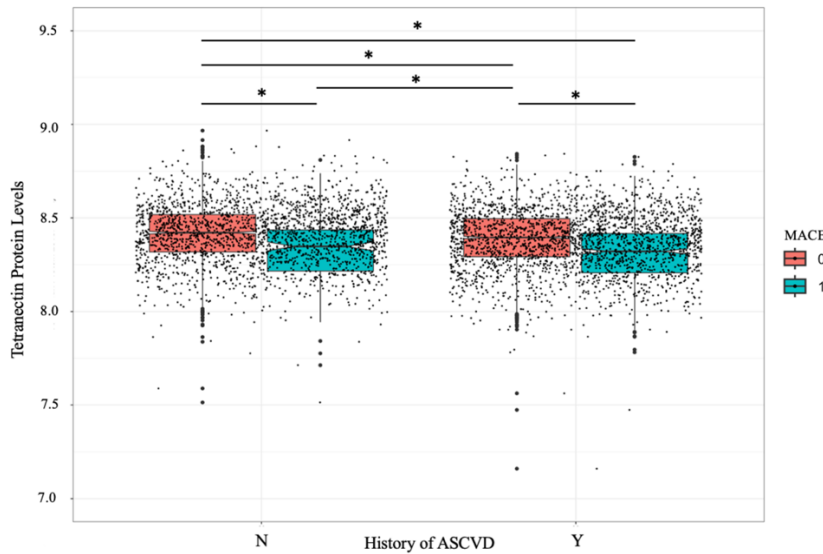

Supplement Table 8: Post-hoc Tukey honestly significant difference results of baseline tetranectin levels (relative quantification) in cohorts with and without MACE and history of ASCVD in EXSCEL proteomics cohort. Post-hoc testing demonstrated significantly lower levels of baseline tetranectin levels in those with MACE and a history of ASCVD. \*Significant p-value <0.05

| Group 1      | Group 2      | Estimate | 95% CI Lower Bound | 95% CI Upper Bound | FDR adjusted p-value |
|--------------|--------------|----------|--------------------|--------------------|----------------------|
| ASCVD+/MACE+ | ASCVD-/MACE+ | 0.019    | -0.015             | 0.053              | 0.49                 |
| ASCVD+/MACE+ | ASCVD+/MACE- | 0.073    | 0.052              | 0.093              | 4.6e <sup>-9</sup> * |
| ASCVD+/MACE+ | ASCVD-/MACE- | 0.10     | 0.081              | 0.12               | 4.6e <sup>-9</sup> * |
| ASCVD-/MACE+ | ASCVD+/MACE- | 0.054    | 0.024              | 0.084              | 2.7e <sup>-5</sup> * |
| ASCVD-/MACE+ | ASCVD-/MACE- | 0.083    | 0.053              | 0.11               | 4.4e <sup>-9</sup> * |
| ASCVD+/MACE- | ASCVD-/MACE- | 0.029    | 0.016              | 0.042              | 5.2e <sup>-8</sup> * |

Supplement Figure 3: *Boxplot of fibulin-1 levels stratified by MACE and history of ASCVD in EXSCEL proteomics cohort.* MACE+ cohorts +/- history of ASCVD have significantly higher levels of circulating baseline fibulin-1 compared to MACE- individuals,  $p = 0.029$ . ASCVD+/MACE+ individuals have the highest mean levels of circulating fibulin-1 compared to all other groups. \*Significant p-value  $<0.05$

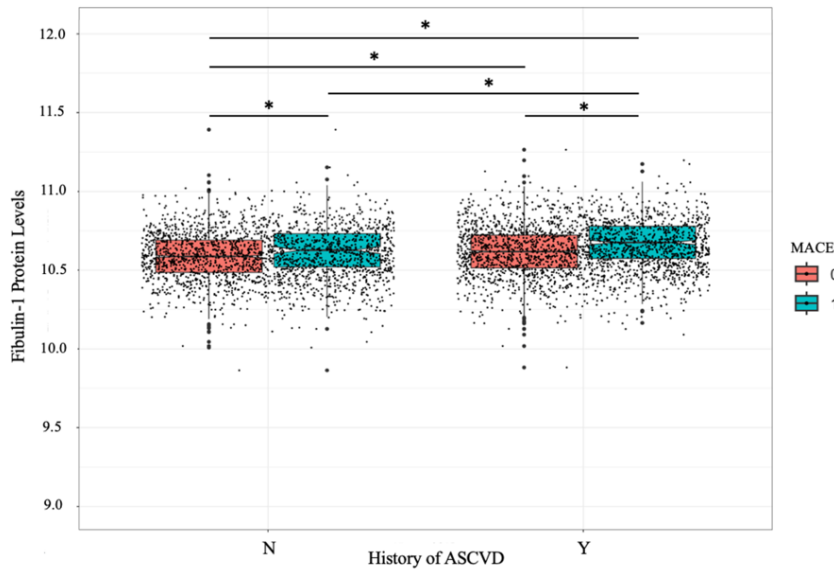

Supplement Table 9: *Post-hoc Tukey honestly significant difference results of baseline fibulin-1 levels (relative quantification) in history of ASCVD and MACE subsets in EXSCEL proteomics cohort.* Post-hoc testing demonstrated significantly higher levels of baseline fibulin-1 levels in people with MACE and history of ASCVD. \*Significant p-value  $<0.05$

| Group 1      | Group 2      | Estimate | 95% CI Lower Bound | 95% CI Upper Bound | FDR adjusted p-value |
|--------------|--------------|----------|--------------------|--------------------|----------------------|
| ASCVD+/MACE+ | ASCVD-/MACE+ | -0.047   | -0.080             | -0.014             | 0.0015*              |
| ASCVD+/MACE+ | ASCVD+/MACE- | -0.060   | -0.080             | -0.040             | $4.6e^{-9}$ *        |
| ASCVD+/MACE+ | ASCVD-/MACE- | -0.090   | -0.11              | -0.070             | $4.6e^{-9}$ *        |
| ASCVD-/MACE+ | ASCVD+/MACE- | -0.013   | -0.042             | 0.017              | 0.68                 |
| ASCVD-/MACE+ | ASCVD-/MACE- | -0.043   | -0.072             | -0.013             | 0.0012 *             |
| ASCVD+/MACE- | ASCVD-/MACE- | -0.030   | -0.042             | -0.017             | $1.2e^{-8}$ *        |

Supplement Figure 4: *Boxplots of tetranectin and fibulin-1 levels at baseline and 12-months stratified by treatment arm in the EXSCEL proteomics cohort.* Visual differences in raw protein levels over time were modest. However, linear mixed-effect modeling demonstrated a significant treatment-associated change over time for tetranectin ( $p < 0.05$ ), whereas fibulin-1 did not show significant modification by GLP-1 RA treatment.

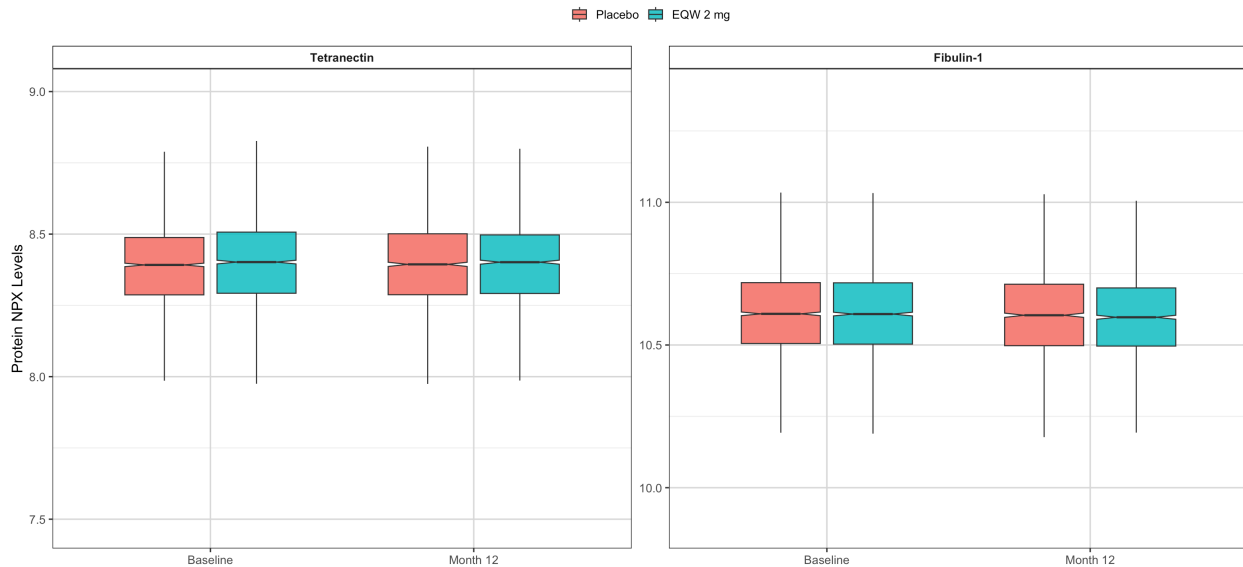

Supplemental Table 10: *Mean change in log-transformed protein NPX values from baseline to Month 12 by treatment arm in the EXSCEL proteomics cohort.* Values are shown as mean change (Month 12 – baseline) with standard deviation. Negative values reflect decreasing protein levels over time and positive values reflect increasing levels. Tetranectin demonstrated a modest directional difference between treatment arms, with a mean decrease in the GLP-1 RA group and a mean increase in the placebo group, whereas fibulin-1 showed similarly small mean decreases in both groups.

|             | Placebo (Mean Change, SD) | GLP-1 RA (Mean Change, SD) |
|-------------|---------------------------|----------------------------|
| Tetranectin | +0.00676 (0.129)          | -0.00628 (0.134)           |
| Fibulin-1   | -0.0132 (0.144)           | -0.0114 (0.145)            |

| Supplement Table 11: <i>Causal mediation analysis of weight loss for GLP-1 RA–modified proteins.</i><br>Displayed are the average causal mediation effect (ACME), average direct effect (ADE), total effect (TE), proportion mediated for each protein, with 95% confidence intervals and corresponding p-values. Significant ACME values indicate proteins for which part of the treatment-associated change is mediated by weight loss from baseline to 12 | ACME estimate (95% CI) | ACME p-value | ADE estimate (95% CI) | ADE p-value | TE estimate (95% CI) | TE p-value | Proportion mediated (95% CI) | Proportion mediated p-value |
|--------------------------------------------------------------------------------------------------------------------------------------------------------------------------------------------------------------------------------------------------------------------------------------------------------------------------------------------------------------------------------------------------------------------------------------------------------------|------------------------|--------------|-----------------------|-------------|----------------------|------------|------------------------------|-----------------------------|
|                                                                                                                                                                                                                                                                                                                                                                                                                                                              |                        |              |                       |             |                      |            |                              |                             |

|                                                                                                                              |                                                       |                   |                                                       |                   |                                                       |                   |                                        |            |
|------------------------------------------------------------------------------------------------------------------------------|-------------------------------------------------------|-------------------|-------------------------------------------------------|-------------------|-------------------------------------------------------|-------------------|----------------------------------------|------------|
| months. The proportion mediated represents the estimated fraction of the total treatment effect attributable to weight loss. |                                                       |                   |                                                       |                   |                                                       |                   |                                        |            |
| Protein                                                                                                                      |                                                       |                   |                                                       |                   |                                                       |                   |                                        |            |
| Kremen protein 1                                                                                                             | -<br>0.0<br>11<br>(-<br>0.0<br>19,<br>-<br>0.0<br>05) | <<br>0.<br>0<br>1 | -<br>0.1<br>65<br>(-<br>0.2<br>13,<br>-<br>0.1<br>19) | <<br>0.<br>0<br>1 | -<br>0.1<br>76<br>(-<br>0.2<br>25,<br>-<br>0.1<br>31) | <<br>0.<br>0<br>1 | 0.06<br>4<br>(0.0<br>26,<br>0.11<br>5) | <0.0<br>01 |
| Roundabout homolog 2                                                                                                         | -<br>0.0<br>10<br>(-<br>0.0<br>16,<br>-<br>0.0<br>05) | <<br>0.<br>0<br>1 | -<br>0.1<br>13<br>(-<br>0.1<br>55,<br>-<br>0.0<br>72) | <<br>0.<br>0<br>1 | -<br>0.1<br>23<br>(-<br>0.1<br>65,<br>-<br>0.0<br>84) | <<br>0.<br>0<br>1 | 0.08<br>4<br>(0.0<br>40,<br>0.15<br>3) | <0.0<br>01 |
| C-type mannose receptor 2                                                                                                    | -<br>0.0<br>18<br>(-<br>0.0<br>27,<br>-<br>0.0<br>11) | <<br>0.<br>0<br>1 | -<br>0.1<br>88<br>(-<br>0.2<br>36,<br>-<br>0.1<br>43) | <<br>0.<br>0<br>1 | -<br>0.2<br>06<br>(-<br>0.2<br>53,<br>-<br>0.1<br>59) | <<br>0.<br>0<br>1 | 0.08<br>5<br>(0.0<br>50,<br>0.13<br>1) | <0.0<br>01 |
| Pulmonary surfactant-associated protein D                                                                                    | -<br>0.0<br>07<br>(-<br>0.0<br>11,<br>-<br>0.0<br>02) | <<br>0.<br>0<br>1 | -<br>0.0<br>58<br>(-<br>0.0<br>91,<br>-<br>0.0<br>25) | <<br>0.<br>0<br>1 | -<br>0.0<br>65<br>(-<br>0.0<br>97,<br>-<br>0.0<br>32) | <<br>0.<br>0<br>1 | 0.10<br>3<br>(0.0<br>36,<br>0.23<br>0) | <0.0<br>01 |
| Extracellular superoxide dismutase [Cu-Zn]                                                                                   | 0.0<br>11<br>(0.0<br>06,<br>0.0<br>17)                | <<br>0.<br>0<br>1 | 0.0<br>83<br>(0.<br>04<br>0,<br>0.1<br>22)            | <<br>0.<br>0<br>1 | 0.0<br>94<br>(0.<br>05<br>0,<br>0.1<br>34)            | <<br>0.<br>0<br>1 | 0.11<br>2<br>(0.0<br>56,<br>0.23<br>4) | <0.0<br>01 |
| N-acylethanolamine-hydrolyzing acid amidase                                                                                  | 0.0<br>09<br>(0.0<br>04,<br>0.0<br>14)                | <<br>0.<br>0<br>1 | 0.0<br>69<br>(0.<br>02<br>8,<br>0.1<br>07)            | <<br>0.<br>0<br>1 | 0.0<br>77<br>(0.<br>03<br>8,<br>0.1<br>14)            | <<br>0.<br>0<br>1 | 0.11<br>3<br>(0.0<br>44,<br>0.25<br>2) | <0.0<br>01 |
| Laminin-2                                                                                                                    | -<br>0.0                                              | <<br>0.           | -<br>0.1                                              | <<br>0.           | -<br>0.1                                              | <<br>0.           | 0.11<br>7                              | <0.0<br>01 |

|                                       |                                                       |                   |                                                       |                   |                                                       |                       |                                        |            |
|---------------------------------------|-------------------------------------------------------|-------------------|-------------------------------------------------------|-------------------|-------------------------------------------------------|-----------------------|----------------------------------------|------------|
|                                       | 14<br>(-<br>0.0<br>21,<br>-<br>0.0<br>08)             | 0<br>0<br>1       | 07<br>(-<br>0.1<br>45,<br>-<br>0.0<br>69)             | 0<br>0<br>1       | 22<br>(-<br>0.1<br>60,<br>-<br>0.0<br>84)             | .0<br>0<br>1          | (0.0<br>63,<br>0.19<br>7)              |            |
| Peflin                                | 0.0<br>12<br>(0.0<br>06,<br>0.0<br>19)                | <<br>0.<br>0<br>1 | 0.0<br>89<br>(0.<br>04<br>6,<br>0.1<br>36)            | <<br>0.<br>0<br>1 | 0.1<br>01<br>(0.<br>05<br>8,<br>0.1<br>46)            | <<br>0<br>.<br>0<br>1 | 0.11<br>9<br>(0.0<br>52,<br>0.24<br>1) | <0.0<br>01 |
| Thrombospondin-2                      | -<br>0.0<br>14<br>(-<br>0.0<br>21,<br>-<br>0.0<br>08) | <<br>0.<br>0<br>1 | -<br>0.0<br>96<br>(-<br>0.1<br>38,<br>-<br>0.0<br>53) | <<br>0.<br>0<br>1 | -<br>0.1<br>10<br>(-<br>0.1<br>53,<br>-<br>0.0<br>68) | <<br>0<br>.<br>0<br>1 | 0.12<br>6<br>(0.0<br>65,<br>0.24<br>4) | <0.0<br>01 |
| Microfibril-associated glycoprotein 4 | -<br>0.0<br>16<br>(-<br>0.0<br>24,<br>-<br>0.0<br>10) | <<br>0.<br>0<br>1 | -<br>0.1<br>09<br>(-<br>0.1<br>53,<br>-<br>0.0<br>65) | <<br>0.<br>0<br>1 | -<br>0.1<br>25<br>(-<br>0.1<br>69,<br>-<br>0.0<br>82) | <<br>0<br>.<br>0<br>1 | 0.13<br>0<br>(0.0<br>74,<br>0.22<br>4) | <0.0<br>01 |
| Interleukin-1 receptor type 2         | -<br>0.0<br>18<br>(-<br>0.0<br>25,<br>-<br>0.0<br>12) | <<br>0.<br>0<br>1 | -<br>0.1<br>16<br>(-<br>0.1<br>53,<br>-<br>0.0<br>83) | <<br>0.<br>0<br>1 | -<br>0.1<br>34<br>(-<br>0.1<br>71,<br>-<br>0.1<br>02) | <<br>0<br>.<br>0<br>1 | 0.13<br>5<br>(0.0<br>87,<br>0.21<br>0) | <0.0<br>01 |
| Heat shock 70 kDa protein 1A          | -<br>0.0<br>15<br>(-<br>0.0<br>24,<br>-<br>0.0<br>08) | <<br>0.<br>0<br>1 | -<br>0.0<br>74<br>(-<br>0.1<br>27,<br>-<br>0.0<br>21) | 0.<br>0<br>1      | -<br>0.0<br>90<br>(-<br>0.1<br>42,<br>-<br>0.0<br>36) | <<br>0<br>.<br>0<br>1 | 0.16<br>8<br>(0.0<br>78,<br>0.45<br>1) | <0.0<br>01 |
| Heat shock 70 kDa protein 1A          | -<br>0.0<br>18<br>(-<br>0.0<br>26,                    | <<br>0.<br>0<br>1 | -<br>0.0<br>83<br>(-<br>0.1<br>36,                    | 0.<br>0<br>4      | -<br>0.1<br>01<br>(-<br>0.1<br>54,                    | <<br>0<br>.<br>0<br>1 | 0.17<br>5<br>(0.0<br>87,<br>0.38<br>6) | <0.0<br>01 |

|                                                       |                                                       |                   |                                                       |                   |                                                       |                         |                                        |            |
|-------------------------------------------------------|-------------------------------------------------------|-------------------|-------------------------------------------------------|-------------------|-------------------------------------------------------|-------------------------|----------------------------------------|------------|
|                                                       | -<br>0.0<br>10)                                       |                   | -<br>0.0<br>29)                                       |                   | -<br>0.0<br>47)                                       |                         |                                        |            |
| Heat shock 70 kDa protein 1A                          | -<br>0.0<br>16<br>(-<br>0.0<br>25,<br>-<br>0.0<br>08) | <<br>0.<br>0<br>1 | -<br>0.0<br>69<br>(-<br>0.1<br>23,<br>-<br>0.0<br>14) | 0.<br>0<br>6      | -<br>0.0<br>85<br>(-<br>0.1<br>39,<br>-<br>0.0<br>32) | 0<br>. 0<br>0<br>2      | 0.18<br>9<br>(0.0<br>83,<br>0.53<br>5) | 0.00<br>2  |
| Secretoglobin family 3A member 1                      | 0.0<br>17<br>(0.0<br>12,<br>0.0<br>23)                | <<br>0.<br>0<br>1 | 0.0<br>67<br>(0.<br>03<br>9,<br>0.0<br>94)            | <<br>0.<br>0<br>1 | 0.0<br>84<br>(0.<br>05<br>7,<br>0.1<br>11)            | <<br>0<br>. 0<br>0<br>1 | 0.20<br>4<br>(0.1<br>34,<br>0.31<br>9) | <0.0<br>01 |
| Heat shock 70 kDa protein 1A                          | -<br>0.0<br>19<br>(-<br>0.0<br>27,<br>-<br>0.0<br>11) | <<br>0.<br>0<br>1 | -<br>0.0<br>69<br>(-<br>0.1<br>24,<br>-<br>0.0<br>13) | 0.<br>0<br>6      | -<br>0.0<br>88<br>(-<br>0.1<br>43,<br>-<br>0.0<br>32) | 0<br>. 0<br>0<br>2      | 0.20<br>9<br>(0.1<br>05,<br>0.60<br>2) | 0.00<br>2  |
| Cyclic AMP-dependent transcription factor ATF-6 alpha | -<br>0.0<br>27<br>(-<br>0.0<br>36,<br>-<br>0.0<br>20) | <<br>0.<br>0<br>1 | -<br>0.0<br>83<br>(-<br>0.1<br>17,<br>-<br>0.0<br>46) | <<br>0.<br>0<br>1 | -<br>0.1<br>10<br>(-<br>0.1<br>46,<br>-<br>0.0<br>73) | <<br>0<br>. 0<br>0<br>1 | 0.24<br>4<br>(0.1<br>63,<br>0.38<br>8) | <0.0<br>01 |
| Tetranectin                                           | -<br>0.0<br>13<br>(-<br>0.0<br>20,<br>-<br>0.0<br>07) | <<br>0.<br>0<br>1 | -<br>0.0<br>39<br>(-<br>0.0<br>87,<br>0.0<br>05)      | 0.<br>0<br>6      | -<br>0.0<br>52<br>(-<br>0.1<br>00,<br>-<br>0.0<br>09) | 0<br>. 0<br>0<br>4      | 0.24<br>7<br>(0.0<br>86,<br>1.23<br>6) | 0.02<br>4  |
| Cholinesterase                                        | -<br>0.0<br>22<br>(-<br>0.0<br>30,<br>-<br>0.0<br>15) | <<br>0.<br>0<br>1 | -<br>0.0<br>40<br>(-<br>0.0<br>79,<br>-<br>0.0<br>01) | 0.<br>0<br>4<br>4 | -<br>0.0<br>61<br>(-<br>0.1<br>00,<br>-<br>0.0<br>24) | <<br>0<br>. 0<br>0<br>1 | 0.35<br>3<br>(0.1<br>95,<br>0.96<br>8) | <0.0<br>01 |

|                                                            |                                                       |                   |                                                       |                   |                                                       |                    |                                                 |           |
|------------------------------------------------------------|-------------------------------------------------------|-------------------|-------------------------------------------------------|-------------------|-------------------------------------------------------|--------------------|-------------------------------------------------|-----------|
| Beta-enolase                                               | -<br>0.0<br>36<br>(-<br>0.0<br>47,<br>-<br>0.0<br>25) | <<br>0.<br>0<br>1 | -<br>0.0<br>29<br>(-<br>0.0<br>76,<br>0.0<br>25)      | 0.<br>0.<br>5     | -<br>0.0<br>64<br>(-<br>0.1<br>11,<br>-<br>0.0<br>11) | 0<br>. 0<br>1<br>8 | 0.53<br>5<br>(0.2<br>84,<br>2.39<br>6)          | 0.01<br>8 |
| EGF-containing fibulin-like extracellular matrix protein 1 | -<br>0.0<br>07<br>(-<br>0.0<br>13,<br>-<br>0.0<br>03) | 0.<br>0.<br>4     | -<br>0.1<br>41<br>(-<br>0.1<br>79,<br>-<br>0.1<br>06) | <<br>0.<br>0<br>1 | -<br>0.1<br>48<br>(-<br>0.1<br>86,<br>-<br>0.1<br>13) | <<br>0<br>0<br>1   | 0.05<br>0<br>(0.0<br>17,<br>0.09<br>1)          | 0.00<br>4 |
| Lymphatic vessel endothelial hyaluronic acid receptor 1    | -<br>0.0<br>07<br>(-<br>0.0<br>12,<br>-<br>0.0<br>01) | 0.<br>0.<br>4     | -<br>0.1<br>10<br>(-<br>0.1<br>49,<br>-<br>0.0<br>71) | <<br>0.<br>0<br>1 | -<br>0.1<br>17<br>(-<br>0.1<br>55,<br>-<br>0.0<br>76) | <<br>0<br>0<br>1   | 0.05<br>6<br>(0.0<br>13,<br>0.12<br>3)          | 0.00<br>4 |
| Protocadherin gamma-A1                                     | 0.0<br>04<br>(0.0<br>01,<br>0.0<br>08)                | 0.<br>0.<br>6     | -<br>0.0<br>48<br>(-<br>0.0<br>72,<br>-<br>0.0<br>23) | <<br>0.<br>0<br>1 | -<br>0.0<br>43<br>(-<br>0.0<br>68,<br>-<br>0.0<br>19) | <<br>0<br>0<br>1   | -<br>0.09<br>7 (-<br>0.25<br>5, -<br>0.02<br>4) | 0.00<br>6 |
| Heat shock 70 kDa protein 1A                               | -<br>0.0<br>08<br>(-<br>0.0<br>16,<br>-<br>0.0<br>01) | 0.<br>0.<br>6     | -<br>0.0<br>92<br>(-<br>0.1<br>50,<br>-<br>0.0<br>38) | 0.<br>0.<br>2     | -<br>0.1<br>00<br>(-<br>0.1<br>57,<br>-<br>0.0<br>47) | 0<br>. 0<br>0<br>2 | 0.08<br>2<br>(0.0<br>08,<br>0.22<br>8)          | 0.02<br>8 |
| Interferon lambda receptor 1                               | -<br>0.0<br>06<br>(-<br>0.0<br>13,<br>-<br>0.0<br>00) | 0.<br>0.<br>6     | -<br>0.0<br>67<br>(-<br>0.1<br>18,<br>-<br>0.0<br>19) | 0.<br>0.<br>2     | -<br>0.0<br>73<br>(-<br>0.1<br>22,<br>-<br>0.0<br>26) | <<br>0<br>0<br>1   | 0.08<br>4<br>(0.0<br>05,<br>0.28<br>8)          | 0.03<br>6 |

|                                     |                                                       |                             |                                                       |                        |                                                       |                         |                                                 |           |
|-------------------------------------|-------------------------------------------------------|-----------------------------|-------------------------------------------------------|------------------------|-------------------------------------------------------|-------------------------|-------------------------------------------------|-----------|
| IQ domain-containing protein F1     | -<br>0.0<br>08<br>(-<br>0.0<br>16,<br>-<br>0.0<br>00) | 0.<br>0<br>5<br>0<br>1<br>5 | 0.1<br>34<br>(0.<br>07<br>5,<br>0.1<br>98)            | <<br>0.<br>0<br>0<br>1 | 0.1<br>26<br>(0.<br>06<br>8,<br>0.1<br>89)            | <<br>0<br>. 0<br>0<br>1 | -<br>0.06<br>2 (-<br>0.16<br>2, -<br>0.00<br>0) | 0.05      |
| Heat shock 70 kDa protein 1A        | -<br>0.0<br>07<br>(-<br>0.0<br>14,<br>0.0<br>00)      | 0.<br>0<br>4<br>0<br>0<br>4 | -<br>0.0<br>85<br>(-<br>0.1<br>44,<br>-<br>0.0<br>27) | 0.<br>0<br>0<br>0<br>2 | -<br>0.0<br>92<br>(-<br>0.1<br>52,<br>-<br>0.0<br>32) | <<br>0<br>. 0<br>0<br>1 | 0.07<br>6 (-<br>0.00<br>1,<br>0.25<br>8)        | 0.05<br>4 |
| Pancreatic triacylglycerol lipase   | 0.0<br>05<br>(-<br>0.0<br>01,<br>0.0<br>12)           | 0.<br>0<br>1<br>0<br>2      | 0.4<br>51<br>(0.<br>40<br>3,<br>0.4<br>97)            | <<br>0.<br>0<br>0<br>1 | 0.4<br>56<br>(0.<br>41<br>0,<br>0.5<br>02)            | <<br>0<br>. 0<br>0<br>1 | 0.01<br>1 (-<br>0.00<br>2,<br>0.02<br>6)        | 0.10<br>2 |
| Angiopoietin-2                      | -<br>0.0<br>05<br>(-<br>0.0<br>12,<br>0.0<br>01)      | 0.<br>0<br>1<br>0<br>2      | 0.1<br>50<br>(-<br>0.1<br>93,<br>-<br>0.1<br>02)      | <<br>0.<br>0<br>0<br>1 | 0.1<br>55<br>(-<br>0.1<br>98,<br>-<br>0.1<br>07)      | <<br>0<br>. 0<br>0<br>1 | 0.03<br>1 (-<br>0.00<br>8,<br>0.07<br>7)        | 0.12<br>2 |
| Asporin                             | -<br>0.0<br>05<br>(-<br>0.0<br>12,<br>0.0<br>01)      | 0.<br>0<br>1<br>0<br>2<br>4 | -<br>0.0<br>88<br>(-<br>0.1<br>41,<br>-<br>0.0<br>35) | 0.<br>0<br>0<br>0<br>2 | -<br>0.0<br>93<br>(-<br>0.1<br>46,<br>-<br>0.0<br>42) | <<br>0<br>. 0<br>0<br>2 | 0.05<br>4 (-<br>0.01<br>4,<br>0.18<br>4)        | 0.12<br>6 |
| Zymogen granule membrane protein 16 | -<br>0.0<br>05<br>(-<br>0.0<br>12,<br>0.0<br>02)      | 0.<br>0<br>1<br>3<br>4      | -<br>0.0<br>81<br>(-<br>0.1<br>36,<br>-<br>0.0<br>28) | 0.<br>0<br>0<br>0<br>1 | -<br>0.0<br>86<br>(-<br>0.1<br>41,<br>-<br>0.0<br>33) | <<br>0<br>. 0<br>0<br>4 | 0.06<br>0 (-<br>0.02<br>8,<br>0.21<br>0)        | 0.13<br>8 |
| Mucin-16                            | -<br>0.0<br>02<br>(-<br>0.0<br>02)                    | 0.<br>4<br>3<br>2           | -<br>0.0<br>82<br>(-<br>0.0<br>02)                    | <<br>0.<br>0<br>0      | -<br>0.0<br>84<br>(-<br>0.0<br>02)                    | <<br>0<br>. 0<br>0<br>1 | 0.02<br>8 (-<br>0.04<br>1,<br>0.43<br>2)        | 0.43<br>2 |

|                           |                                             |         |                                            |              |                                            |                  |                                          |           |
|---------------------------|---------------------------------------------|---------|--------------------------------------------|--------------|--------------------------------------------|------------------|------------------------------------------|-----------|
|                           | 0.0<br>08,<br>0.0<br>03)                    |         | 0.1<br>28,<br>-<br>0.0<br>37)              | 0<br>1       | 0.1<br>28,<br>-<br>0.0<br>39)              | 0<br>1           | 0.13<br>0)                               |           |
| ADP-ribosylation factor 1 | 0.0<br>03<br>(-<br>0.0<br>04,<br>0.0<br>09) | 0.<br>4 | 0.0<br>68<br>(0.<br>01<br>4,<br>0.1<br>21) | 0.<br>0<br>8 | 0.0<br>71<br>(0.<br>01<br>8,<br>0.1<br>23) | 0<br>0<br>0<br>6 | 0.03<br>8 (-<br>0.06<br>6,<br>0.25<br>6) | 0.43<br>4 |

Supplement Table 12: *Results from multivariable logistic regression analyses between tetranectin, fibulin-1, MACE and history of CAD subset by T2DM and non-T2DM in the PROMISE cohort.* Multivariable logistic regression analyses demonstrated significantly lower levels of circulating tetranectin in cohorts with T2DM as well as non-T2DM. T2DM only cohort results and Fibulin-1 results did not meet significance. Covariates included age, sex, race, BMI, HTN, smoking status, statin, history of cardiovascular disease, history of heart failure, history of hyperlipidemia, glomerular filtration rate. \*Significant p-value <0.05

| Promise Cohort        | Analysis                        | OR (95% CI)       | p-value  |
|-----------------------|---------------------------------|-------------------|----------|
| Full Cohort (N=860)   | CAD ~ tetranectin + covariates  | 0.80 (0.68, 0.93) | 0.0041*  |
| Full Cohort (N=860)   | CAD ~ fibulin-1 + covariates    | 1.13 (0.88, 1.19) | 0.38     |
| Full Cohort (N=860)   | MACE ~ tetranectin + covariates | 0.88 (0.80, 0.98) | 0.013 *  |
| Full Cohort (N=860)   | MACE ~ fibulin-1 + covariates   | 0.98 (0.90, 1.07) | 0.33     |
| T2DM Only (N=178)     | CAD ~ tetranectin + covariates  | 0.78 (0.52, 1.15) | 0.20     |
| T2DM Only (N=178)     | CAD ~ fibulin-1 + covariates    | 1.10 (0.75,1.24)  | 0.36     |
| T2DM Only (N=178)     | MACE ~ tetranectin + covariates | 0.99 (0.79, 1.24) | 0.94     |
| T2DM Only (N=178)     | MACE ~ fibulin-1 + covariates   | 0.99 (0.85, 1.14) | 0.88     |
| Non-T2DM Only (N=681) | CAD ~ tetranectin + covariates  | 0.79 (0.67, 94)   | 0.0082 * |
| Non-T2DM Only (N=681) | CAD ~ fibulin-1 + covariates    | 1.12 (0.78 ,1.23) | 0.32     |

|                          |                                    |                  |         |
|--------------------------|------------------------------------|------------------|---------|
| Non-T2DM Only<br>(N=681) | MACE ~ tetranectin +<br>covariates | 0.85 (0.76,0.94) | 0.002 * |
| Non-T2DM Only<br>(N=681) | MACE ~ fibulin-1 +<br>covariates   | 0.99 (0.88, 1.3) | 0.21    |

Supplement Figure 5: *Boxplot of tetranectin levels stratified by T2DM and MACE in the PROMISE cohort.* ANOVA testing of mean circulating tetranectin levels in cohorts +/- T2DM and +/- MACE in Promise cohort demonstrated significant lower levels of tetranectin in T2DM+ compared to T2DM- and significant lower levels of tetranectin in MACE+ compared to MACE-,  $p = 0.049$ . \*Significant  $p$ -value  $<0.05$

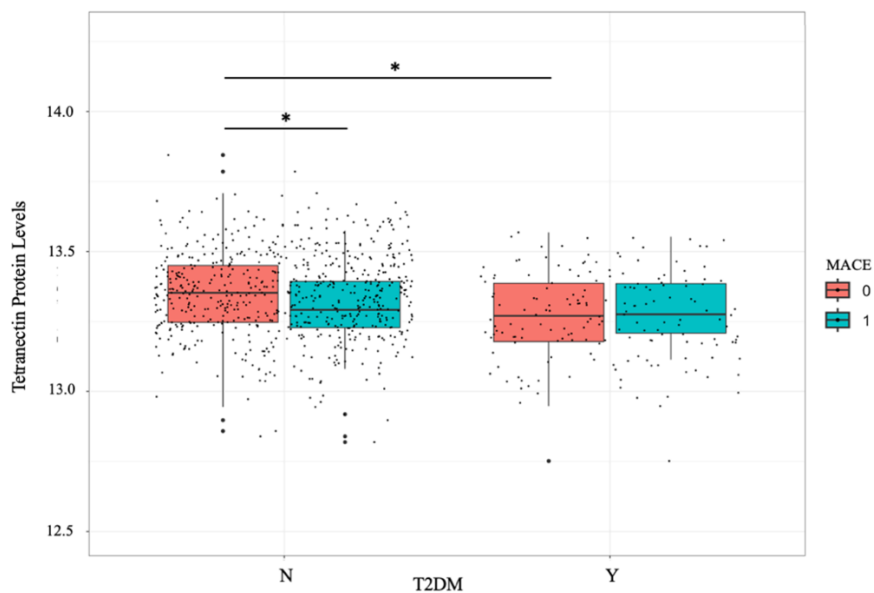

Supplement Table 13: *Post-hoc Tukey honestly significant difference results of tetranectin levels (relative quantification) in MACE and T2DM subsets of the PROMISE cohort.* Post-hoc testing demonstrated significantly lower levels of tetranectin in people with T2DM and MACE compared to non-T2DM. \*Significant  $p$ -value  $<0.05$

| Group 1     | Group 2     | Estimate | 95% CI<br>Lower<br>Bound | 95% CI<br>Upper<br>Bound | FDR<br>adjusted $p$ -<br>value |
|-------------|-------------|----------|--------------------------|--------------------------|--------------------------------|
| T2DM+/MACE+ | T2DM-/MACE+ | -0.035   | -0.19                    | 0.11                     | 0.94                           |
| T2DM+/MACE+ | T2DM+/MACE- | -0.035   | -0.18                    | 0.11                     | 0.92                           |

|             |             |         |        |       |                      |
|-------------|-------------|---------|--------|-------|----------------------|
| T2DM+/MACE+ | T2DM-/MACE- | 0.046   | -0.092 | 0.18  | 0.83                 |
| T2DM-/MACE+ | T2DM+/MACE- | 0.00063 | -0.076 | 0.078 | 1                    |
| T2DM-/MACE+ | T2DM-/MACE- | 0.081   | 0.0088 | 0.15  | 0.021 *              |
| T2DM+/MACE- | T2DM-/MACE- | 0.081   | 0.047  | 0.12  | 4.9e <sup>-9</sup> * |
